# Supplementary material
Source: publisher figshare collection journal article supplement (https://acs.figshare.com/ndownloader/files/3958975)
Supplement: Supplementary file 1 [file 3958975]

**N-Halosuccinimide/AgNO<sub>3</sub>–Efficient Reagent Systems for One Step Synthesis of 2-Haloglycals from Glycals: Application in the Synthesis of 2C-Branched Sugars via Heck Coupling Reactions**

**Suresh Dharuman and Yashwant D. Vankar\***

*Department of Chemistry, Indian Institute of Technology, Kanpur 208 016, India*

Fax: 0091-512-259 0007; E mail: [vankar@iitk.ac.in](mailto:vankar@iitk.ac.in)

**Contents List of the Supporting Information:**

| <b>Contents</b>                                                             | <b>Page Number</b> |
|-----------------------------------------------------------------------------|--------------------|
| General Experimental Methods                                                | 02                 |
| Experimental procedures of <b>2b-33</b>                                     | 02–33              |
| Scanned copy of <sup>1</sup> H and <sup>13</sup> C NMR Spectra <b>2b-33</b> | 34–70              |

**General Experimental Methods.** IR spectra were recorded with FT-IR as a thin film or using KBr pellets and are expressed in  $\text{cm}^{-1}$ .  $^1\text{H}$  (500 MHz or 400 MHz) and  $^{13}\text{C}$  (125 MHz or 100 MHz) NMR spectra were recorded using  $\text{CDCl}_3$  as a solvent. Chemical shifts are reported in ppm downfield to tetramethylsilane. Coupling constants are reported and expressed in Hz; splitting patterns are designated as br (broad), s (singlet), d (doublet), dd (double doublet), m (multiplet), td (triplet of doublet), dt (doublet of triplet). Optical rotations were measured using a polarimeter (AUTOPOL II) at 28 °C. All reactions were carried out using freshly distilled and dry solvents. The visualization of spots on TLC plates was effected by exposure to iodine or spraying with 10%  $\text{H}_2\text{SO}_4$  and charring. Column chromatography was performed over silica gel (100–200 Mesh) using hexane and ethyl acetate as eluents. Mass spectra were obtained from high resolution ESI mass spectrometer using Q–TOF analyser.

**(2*R*,3*R*,4*S*)-3,4-bis(benzyloxy)-2-(benzyloxymethyl)-5-bromo-3,4-dihydro-2*H*-pyran (2*b*)**

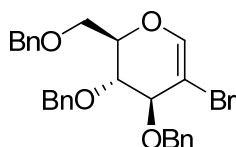

To a stirred solution of **1** (100 mg, 0.24 mmol) in dry  $\text{CH}_3\text{CN}$  (2 mL) at 80 °C under  $\text{N}_2$  atmosphere were added NBS (51 mg, 0.28 mmol) and  $\text{AgNO}_3$  (8.1 mg, 0.048 mmol) successively and stirred for 2 h. On consumption of starting material (TLC monitoring), the reaction mixture was filtered through sintered funnel and the filtrate was evaporated to give a crude product which was purified by silica gel column chromatography (5–10% of EtOAc/hexane) to obtain **2b** (74 mg, 63%) as a colorless oil.  $R_f$  0.10 (hexane:ethyl acetate, 4:1);  $[\alpha]_D^{28} = +8.3$  ( $c$  0.60,  $\text{CH}_2\text{Cl}_2$ ); IR (neat)  $\nu_{\text{max}}$  2968, 2880, 1690, 1615, 1381, 1194, 1069  $\text{cm}^{-1}$ ;  $^1\text{H}$  NMR (500 MHz,  $\text{CDCl}_3$ )  $\delta$  7.35–7.25 (m, 15H), 6.70 (s, 1H), 4.70 (d,  $J = 11.5$  Hz, 1H), 4.67 (d,

$J = 11.5$  Hz, 1H), 4.61 (d,  $J = 8.5$  Hz, 1H), 4.59 (d,  $J = 8.5$  Hz, 1H), 4.52 (s, 2H), 4.30 (dd,  $J = 5.7, 10.0$  Hz, 1H), 4.12 (d,  $J = 4.3$  Hz, 1H), 3.97 (dd,  $J = 4.6, 6.0$  Hz, 1H), 3.79 (dd,  $J = 6.0, 10.6$  Hz, 1H), 3.70 (dd,  $J = 4.0, 10.6$  Hz, 1H);  $^{13}\text{C}$  NMR (125 MHz,  $\text{CDCl}_3$ )  $\delta$  144.2, 137.8–127.8 (ArC), 98.7, 76.4, 74.0, 73.5, 72.9, 72.4, 67.8; HRMS calcd for  $\text{C}_{27}\text{H}_{31}\text{BrNO}_4$   $[\text{M} + \text{NH}_4]^+$  512.1436, found 512.1439.

**(2*R*,3*S*,4*S*)-3,4-bis(benzyloxy)-2-(benzyloxymethyl)-5-bromo-3,4-dihydro-2*H*-pyran (4b)**

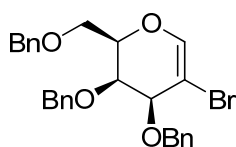

To a stirred solution of **4** (100 mg, 0.24 mmol) in dry  $\text{CH}_3\text{CN}$  (2 mL) at  $80^\circ\text{C}$  under  $\text{N}_2$  atmosphere were added NBS (51 mg, 0.28 mmol) and  $\text{AgNO}_3$  (8.1 mg, 0.048 mmol) successively and stirred for 1 h. On consumption of starting material (TLC monitoring), the reaction mixture was filtered through sintered funnel and the filtrate was evaporated to give a crude product which was purified by silica gel column chromatography (5–10% of EtOAc/hexane) to obtain **4b** (77 mg, 65%) as a colorless oil.  $R_f$  0.10 (hexane:ethyl acetate, 4:1);  $[\alpha]_D^{28} = -2.0$  ( $c$  0.50,  $\text{CH}_2\text{Cl}_2$ ); IR (neat)  $\nu_{\text{max}}$  3063, 2921, 2867, 1637, 1453, 1363, 1181, 1095,  $1027\text{ cm}^{-1}$ ;  $^1\text{H}$  NMR (500 MHz,  $\text{CDCl}_3$ )  $\delta$  7.37–7.25 (m, 15H), 6.57 (s, 1H), 4.81–4.79 (m, 2H), 4.76 (d,  $J = 11.9$  Hz, 1H), 4.59 (d,  $J = 11.6$  Hz, 1H), 4.52 (d,  $J = 11.6$  Hz, 1H), 4.41 (d,  $J = 11.9$  Hz, 1H), 4.35–4.32 (m, 1H), 4.12 (d,  $J = 4.0$  Hz, 1H), 4.01 (t,  $J = 3.9$  Hz, 1H), 3.85 (dd,  $J = 7.9, 10.7$  Hz, 1H), 3.73 (dd,  $J = 3.6, 10.6$  Hz, 1H);  $^{13}\text{C}$  NMR (125 MHz,  $\text{CDCl}_3$ )  $\delta$  143.4, 138.2–127.8 (ArC), 98.5, 75.8, 74.5, 74.1, 73.5, 73.0, 67.8; HRMS calcd for  $\text{C}_{27}\text{H}_{27}\text{BrNaO}_4$   $[\text{M} + \text{Na}]^+$  517.0990, found 517.0990.

**(2*R*,3*R*,4*S*)-2-(acetoxymethyl)-5-iodo-3,4-dihydro-2*H*-pyran-3,4-diyl diacetate (**5a**)**

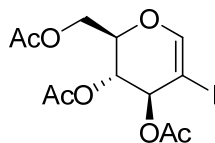

To a stirred solution of **5** (1 g, 3.67 mmol) in dry CH<sub>3</sub>CN (10 mL) at 80 °C under N<sub>2</sub> atmosphere were added NIS (991 mg, 4.4 mmol) and AgNO<sub>3</sub> (124 mg, 0.73 mmol) successively and stirred for 4 h. On consumption of starting material (TLC monitoring), the reaction mixture was filtered through sintered funnel and the filtrate was evaporated to give a crude product which was purified by silica gel column chromatography (20–30% of EtOAc/hexane) to obtain **5a** (1.28 g, 88%) as a colorless oil. *R<sub>f</sub>* 0.40 (hexane:ethyl acetate, 2:1);  $[\alpha]_D^{28} = +30.0$  (*c* 1.00, CH<sub>2</sub>Cl<sub>2</sub>); IR (neat)  $\nu_{\max}$  2924, 2853, 1746, 1626, 1370, 1223, 1167, 1053, 1029 cm<sup>-1</sup>; <sup>1</sup>H NMR (500 MHz, CDCl<sub>3</sub>)  $\delta$  6.78 (s, 1H), 5.49 (d, *J* = 5.1 Hz, 1H), 5.22 (dd, *J* = 5.1, 7.0 Hz, 1H), 4.41–4.36 (m, 2H), 4.18 (dd, *J* = 5.5, 14.3 Hz, 1H), 2.10 (s, 3H), 2.07 (s, 3H), 2.06 (s, 3H); <sup>13</sup>C NMR (125 MHz, CDCl<sub>3</sub>)  $\delta$  170.5, 170.3, 169.4, 149.4, 74.0, 70.6, 67.6, 66.3, 61.0, 20.9, 20.8, 20.7; HRMS calcd for C<sub>12</sub>H<sub>15</sub>INaO<sub>7</sub> [*M* + Na]<sup>+</sup> 420.9760, found 420.9763.

**(2*R*,3*S*,4*S*)-2-(acetoxymethyl)-5-iodo-3,4-dihydro-2*H*-pyran-3,4-diyl diacetate (**6a**)**

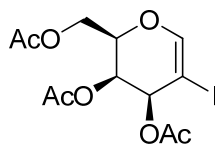

To a stirred solution of **6** (1 g, 3.67 mmol) in dry CH<sub>3</sub>CN (2 mL) at 80 °C under N<sub>2</sub> atmosphere were added NIS (991 mg, 4.4 mmol) and AgNO<sub>3</sub> (124 mg, 0.73 mmol) successively and stirred for 3 h. On consumption of starting material (TLC monitoring), the reaction mixture was filtered

through sintered funnel and the filtrate was evaporated to give a crude product which was purified by silica gel column chromatography (20–30% of EtOAc/hexane) to obtain **6a** (1.2 g, 82%) as a white powder. mp 106–108 °C;  $R_f$  0.40 (hexane:ethyl acetate, 2:1);  $[\alpha]_D^{28} = +36.2$  ( $c$  1.60, CH<sub>2</sub>Cl<sub>2</sub>); IR (neat)  $\nu_{\max}$  2965, 2928, 1744, 1660, 1627, 1433, 1409, 1267, 1226, 1134 cm<sup>-1</sup>; <sup>1</sup>H NMR (500 MHz, CDCl<sub>3</sub>)  $\delta$  6.76 (s, 1H), 5.57 (d,  $J$  = 4.6 Hz, 1H), 5.48 (dd,  $J$  = 2.1, 4.6 Hz, 1H), 4.41 (t,  $J$  = 5.8 Hz, 1H), 4.24 (dd,  $J$  = 7.6, 11.6 Hz, 1H), 4.17 (dd,  $J$  = 5.5, 11.6 Hz, 1H), 2.10 (s, 3H), 2.07 (s, 3H), 2.06 (s, 3H); <sup>13</sup>C NMR (125 MHz, CDCl<sub>3</sub>)  $\delta$  170.9, 169.9, 149.3, 73.2, 67.2, 67.0, 64.5, 61.5, 20.8, 20.7, 20.6; HRMS calcd for C<sub>12</sub>H<sub>15</sub>INaO<sub>7</sub> [M + Na]<sup>+</sup> 420.9760, found 420.9760.

**(2*R*,3*R*,4*S*)-2-((tert-butyldiphenylsilyloxy)methyl)-5-iodo-3,4-dihydro-2*H*-pyran-3,4-diyl diacetate (**7a**)**

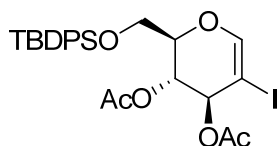

To a stirred solution of **7** (100 mg, 0.21 mmol) in dry CH<sub>3</sub>CN (2 mL) at 80 °C under N<sub>2</sub> atmosphere were added NIS (57.6 mg, 0.25 mmol) and AgNO<sub>3</sub> (7.2 mg, 0.042 mmol) successively and stirred for 2 h. On consumption of starting material (TLC monitoring), the reaction mixture was filtered through sintered funnel and the filtrate was evaporated to give a crude product which was purified by silica gel column chromatography (15–20% of EtOAc/hexane) to obtain **7a** (96 mg, 76%) as a colorless oil.  $R_f$  0.40 (hexane:ethyl acetate, 2:1);  $[\alpha]_D^{28} = +50.0$  ( $c$  0.40, CH<sub>2</sub>Cl<sub>2</sub>); IR (neat)  $\nu_{\max}$  2930, 2857, 1758, 1626, 1427, 1370, 1232, 1170, 1113, 1053, 1029 cm<sup>-1</sup>; <sup>1</sup>H NMR (500 MHz, CDCl<sub>3</sub>)  $\delta$  7.65–7.62 (m, 4H), 7.43–7.36 (m, 6H),

6.72 (s, 1H), 5.52–5.40 (m, 2H), 4.25 (t,  $J = 5.7$  Hz, 1H), 3.84 (dd,  $J = 4.6, 11.4$  Hz, 1H), 3.79 (dd,  $J = 5.1, 11.4$  Hz, 1H), 2.04 (s, 3H), 2.02 (s, 3H), 1.04 (s, 9H);  $^{13}\text{C}$  NMR (125 MHz,  $\text{CDCl}_3$ )  $\delta$  170.1, 169.2, 149.9, 135.6, 133.0, 129.9, 127.8, 127.8, 76.4, 70.9, 67.9, 65.5, 61.2, 26.7, 20.9, 20.8, 19.2; HRMS calcd for  $\text{C}_{26}\text{H}_{35}\text{INO}_6\text{Si}$   $[\text{M} + \text{NH}_4]^+$  612.1278, found 612.1279.

**(2*R*,3*R*,4*S*)-5-bromo-2-((*tert*-butyldiphenylsilyloxy)methyl)-3,4-dihydro-2*H*-pyran-3,4-diyl diacetate (**7b**)**

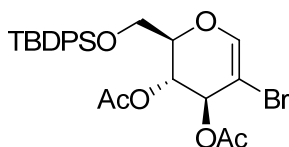

To a stirred solution of **7** (100 mg, 0.21 mmol) in dry  $\text{CH}_3\text{CN}$  (2 mL) at 80 °C under  $\text{N}_2$  atmosphere were added NBS (45.5 mg, 0.25 mmol) and  $\text{AgNO}_3$  (7.2 mg, 0.042 mmol) successively and stirred for 5 h. On consumption of starting material (TLC monitoring), the reaction mixture was filtered through sintered funnel and the filtrate was evaporated to give a crude product which was purified by silica gel column chromatography (15–20% of EtOAc/hexane) to obtain **7b** (79 mg, 68%) as a colorless oil.  $R_f$  0.40 (hexane:ethyl acetate, 2:1);  $[\alpha]_D^{28} = +30.6$  ( $c$  0.75,  $\text{CH}_2\text{Cl}_2$ ); IR (neat)  $\nu_{\text{max}}$  2930, 2857, 1760, 1747, 1642, 1427, 1369, 1232, 1176, 1113, 1053, 1033  $\text{cm}^{-1}$ ;  $^1\text{H}$  NMR (500 MHz,  $\text{CDCl}_3$ )  $\delta$  7.65–7.62 (m, 4H), 7.43–7.36 (m, 6H), 6.67 (s, 1H), 5.45 (d,  $J = 4.2$  Hz, 1H), 5.41 (dd,  $J = 4.2, 5.5$  Hz, 1H), 4.26–4.23 (m, 1H), 3.86–3.78 (m, 2H), 2.04 (s, 3H), 2.02 (s, 3H), 1.05 (s, 9H);  $^{13}\text{C}$  NMR (125 MHz,  $\text{CDCl}_3$ )  $\delta$  170.1, 169.3, 145.6, 135.7, 135.6, 133.0, 132.9, 130.0, 129.9, 127.8, 95.0, 76.3, 69.2, 68.0, 61.0, 26.7, 20.9, 20.8, 19.2; HRMS calcd for  $\text{C}_{26}\text{H}_{35}\text{BrNO}_6\text{Si}$   $[\text{M} + \text{NH}_4]^+$  564.1417, found 564.1412.

**(2*R*,3*R*,4*S*)-5-iodo-3,4-dimethoxy-2-(methoxymethyl)-3,4-dihydro-2*H*-pyran (**8a**)**

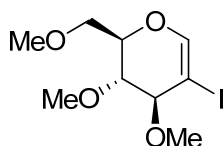

To a stirred solution of **8** (100 mg, 0.53 mmol) in dry CH<sub>3</sub>CN (2 mL) at 80 °C under N<sub>2</sub> atmosphere were added NIS (143.0 mg, 0.63 mmol) and AgNO<sub>3</sub> (18.0 mg, 0.10 mmol) successively and stirred for 15 min. On consumption of starting material (TLC monitoring), the reaction mixture was filtered through sintered funnel and the filtrate was evaporated to give a crude product which was purified by silica gel column chromatography (10–20% of EtOAc/hexane) to obtain **8a** (105 mg, 63%) as a colorless oil. *R<sub>f</sub>* 0.30 (hexane:ethyl acetate, 2:1);  $[\alpha]_D^{28} = +74.5$  (*c* 0.55, CH<sub>2</sub>Cl<sub>2</sub>); IR (neat)  $\nu_{\max}$  2928, 2828, 1626, 1455, 1164, 1104, 1054 cm<sup>-1</sup>; <sup>1</sup>H NMR (500 MHz, CDCl<sub>3</sub>)  $\delta$  6.67 (s, 1H), 4.18–4.15 (m, 1H), 3.77 (d, *J* = 4.9 Hz, 1H), 3.66 (dd, *J* = 6.1, 11.0 Hz, 1H), 3.63–3.62 (m, 1H), 3.57 (dd, *J* = 2.9, 10.3 Hz, 1H), 3.56 (s, 3H), 3.49 (s, 3H), 3.38 (s, 3H); <sup>13</sup>C NMR (125 MHz, CDCl<sub>3</sub>)  $\delta$  148.3, 80.6, 76.2, 75.5, 70.5, 70.2, 59.2, 58.9, 57.4; HRMS calcd for C<sub>9</sub>H<sub>19</sub>INO<sub>4</sub> [M + NH<sub>4</sub>]<sup>+</sup> 332.0359, found 332.0357.

**(2*R*,3*R*,4*S*)-5-bromo-3,4-dimethoxy-2-(methoxymethyl)-3,4-dihydro-2*H*-pyran (**8b**)**

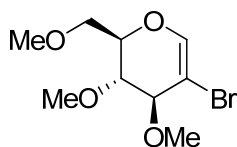

To a stirred solution of **8** (100 mg, 0.53 mmol) in dry CH<sub>3</sub>CN (2 mL) at 80 °C under N<sub>2</sub> atmosphere were added NBS (113.0 mg, 0.63 mmol) and AgNO<sub>3</sub> (18.0 mg, 0.10 mmol) successively and stirred for 0.5 h. On consumption of starting material (TLC monitoring), the reaction mixture was filtered through sintered funnel and the filtrate was evaporated to give a crude product which was purified by silica gel column chromatography (10–20% of

EtOAc/hexane) to obtain **8b** (82 mg, 58%) as a colorless oil.  $R_f$  0.30 (hexane:ethyl acetate, 2:1);  $[\alpha]_D^{28} = +71.1$  ( $c$  0.45,  $\text{CH}_2\text{Cl}_2$ ); IR (neat)  $\nu_{\text{max}}$  2928, 2831, 1651, 1455, 1173, 1381, 1173, 1110, 1054  $\text{cm}^{-1}$ ;  $^1\text{H}$  NMR (500 MHz,  $\text{CDCl}_3$ )  $\delta$  6.64 (s, 1H), 4.20–4.16 (m, 1H), 3.83 (d,  $J = 4.9$  Hz, 1H), 3.67–3.62 (m, 2H), 3.58–3.53 (m, 1H), 3.51 (s, 6H), 3.38 (s, 3H);  $^{13}\text{C}$  NMR (125 MHz,  $\text{CDCl}_3$ )  $\delta$  144.1, 98.6, 78.9, 76.8, 76.0, 70.1, 59.2, 58.7, 57.5; HRMS calcd for  $\text{C}_9\text{H}_{16}\text{BrO}_4$   $[\text{M}+\text{H}]^+$  267.0232, found 267.0232.

**(3*R*,4*R*)-5-iodo-3,4-dihydro-2*H*-pyran-3,4-diyl diacetate (9a)**

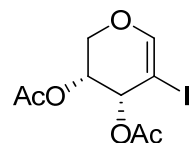

To a stirred solution of **9** (100 mg, 0.49 mmol) in dry  $\text{CH}_3\text{CN}$  (2 mL) at 80 °C under  $\text{N}_2$  atmosphere were added NIS (134.8 mg, 0.59 mmol) and  $\text{AgNO}_3$  (16.8 mg, 0.10 mmol) successively and stirred for 1 h. On consumption of starting material (TLC monitoring), the reaction mixture was filtered through sintered funnel and the filtrate was evaporated to give a crude product which was purified by silica gel column chromatography (10–15% of EtOAc/hexane) to obtain **9a** (139 mg, 86%) as a colorless oil.  $R_f$  0.40 (hexane:ethyl acetate, 3:1);  $[\alpha]_D^{28} = +169.2$  ( $c$  0.65,  $\text{CH}_2\text{Cl}_2$ ); IR (neat)  $\nu_{\text{max}}$  2992, 2889, 1742, 1624, 1458, 1429, 1371, 1245, 1219, 1085, 1052, 1027  $\text{cm}^{-1}$ ;  $^1\text{H}$  NMR (500 MHz,  $\text{CDCl}_3$ )  $\delta$  6.78 (d,  $J = 2.3$  Hz, 1H), 5.61 (s, 1H), 5.30 (dd,  $J = 4.0, 9.7$  Hz, 1H), 4.08 (d,  $J = 10.8$  Hz, 1H), 3.98 (td,  $J = 2.9, 10.3$  Hz, 1H), 2.13 (s, 3H), 2.03 (s, 3H);  $^{13}\text{C}$  NMR (125 MHz,  $\text{CDCl}_3$ )  $\delta$  170.2, 169.5, 151.0, 68.6, 66.0, 63.3, 62.6, 20.8, 20.6; HRMS calcd for  $\text{C}_9\text{H}_{15}\text{INO}_5$   $[\text{M} + \text{NH}_4]^+$  343.9995, found 343.9997.

**(3*R*,4*S*)-5-iodo-3,4-dihydro-2*H*-pyran-3,4-diyl diacetate (10a)**



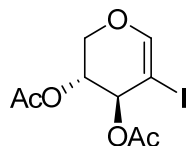

To a stirred solution of **10** (100 mg, 0.49 mmol) in dry CH<sub>3</sub>CN (2 mL) at 80 °C under N<sub>2</sub> atmosphere were added NIS (134.8 mg, 0.59 mmol) and AgNO<sub>3</sub> (16.8 mg, 0.10 mmol) successively and stirred for 1 h. On consumption of starting material (TLC monitoring), the reaction mixture was filtered through sintered funnel and the filtrate was evaporated to give a crude product which was purified by silica gel column chromatography (10–15% of EtOAc/hexane) to obtain **10a** (136 mg, 84%) as a colorless oil. *R<sub>f</sub>* 0.40 (hexane:ethyl acetate, 3:1);  $[\alpha]_D^{28} = -150.0$  (*c* 0.55, CH<sub>2</sub>Cl<sub>2</sub>); IR (neat)  $\nu_{\max}$  2923, 2852, 1742, 1623, 1458, 1449, 1367, 1215, 1176, 1081, 1023 cm<sup>-1</sup>; <sup>1</sup>H NMR (500 MHz, CDCl<sub>3</sub>)  $\delta$  6.91 (s, 1H), 5.24 (s, 1H), 4.95 (d, *J* = 1.7 Hz, 1H), 4.28 (dt, *J* = 2.9, 11.4 Hz, 1H), 3.95 (d, *J* = 12.0 Hz, 1H), 2.12 (s, 3H), 2.10 (s, 3H); <sup>13</sup>C NMR (125 MHz, CDCl<sub>3</sub>)  $\delta$  169.7, 169.5, 151.4, 69.1, 68.2, 63.7, 63.0 20.9; HRMS calcd for C<sub>9</sub>H<sub>15</sub>INO<sub>5</sub> [M + NH<sub>4</sub>]<sup>+</sup> 343.9995, found 343.9998.

**(3R,4S)-5-bromo-3,4-dihydro-2H-pyran-3,4-diyl diacetate (10b)**

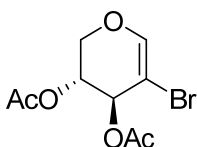

To a stirred solution of **10** (100 mg, 0.49 mmol) in dry CH<sub>3</sub>CN (2 mL) at 80 °C under N<sub>2</sub> atmosphere were added NBS (106.6 mg, 0.59 mmol) and AgNO<sub>3</sub> (16.8 mg, 0.10 mmol) successively and stirred for 3 h. On consumption of starting material (TLC monitoring), the reaction mixture was filtered through sintered funnel and the filtrate was evaporated to give a crude product which was purified by silica gel column chromatography (10–15% of

EtOAc/hexane) to obtain **10b** (102 mg, 73%) as a colorless oil.  $R_f$  0.40 (hexane:ethyl acetate, 3:1);  $[\alpha]_D^{28} = -196.0$  ( $c$  0.35,  $\text{CH}_2\text{Cl}_2$ ); IR (neat)  $\nu_{\text{max}}$  2924, 1741, 1638, 1368, 1215, 1180, 1081, 1023  $\text{cm}^{-1}$ ;  $^1\text{H}$  NMR (500 MHz,  $\text{CDCl}_3$ )  $\delta$  6.81 (s, 1H), 5.24 (s, 1H), 4.90 (br s, 1H), 4.20 (d,  $J = 12.0$  Hz, 1H), 3.84 (d,  $J = 10.5$  Hz, 1H), 2.07 (s, 3H), 2.05 (s, 3H);  $^{13}\text{C}$  NMR (125 MHz,  $\text{CDCl}_3$ )  $\delta$  169.7, 169.4, 147.3, 94.6, 68.1, 67.5, 63.3, 20.9; HRMS calcd for  $\text{C}_9\text{H}_{11}\text{BrNaO}_5$   $[\text{M} + \text{Na}]^+$  300.9688, found 300.9689.

**(S)-4-((2R,3S)-3-(benzyloxy)-4-iodo-2,3-dihydrofuran-2-yl)-2,2-dimethyl-1,3-dioxolane (11a)**

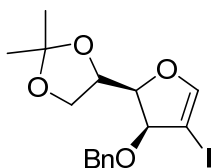

To a stirred solution of **11** (50 mg, 0.18 mmol) in dry  $\text{CH}_3\text{CN}$  (2 mL) at 80  $^\circ\text{C}$  under  $\text{N}_2$  atmosphere were added NIS (48.8 mg, 0.21 mmol) and  $\text{AgNO}_3$  (6.1 mg, 0.036 mmol) successively and stirred for 10 min. On consumption of starting material (TLC monitoring), the reaction mixture was filtered through sintered funnel and the filtrate was evaporated to give a crude product which was purified by silica gel column chromatography (1–5% of EtOAc/hexane) to obtain **11a** (41 mg, 57%) as a colorless oil.  $R_f$  0.50 (hexane:ethyl acetate, 4:1);  $[\alpha]_D^{28} = -26.6$  ( $c$  0.30,  $\text{CH}_2\text{Cl}_2$ ); IR (neat)  $\nu_{\text{max}}$  2925, 2854, 1638, 1604, 1455, 1370, 1118, 1065  $\text{cm}^{-1}$ ;  $^1\text{H}$  NMR (500 MHz,  $\text{CDCl}_3$ )  $\delta$  7.39–7.29 (m, 5H), 6.57 (s, 1H), 4.76 (d,  $J = 11.0$  Hz, 1H), 4.73 (d,  $J = 11.0$  Hz, 1H), 4.56 (d,  $J = 7.3$  Hz, 1H), 4.48–4.40 (m, 2H), 4.08 (dd,  $J = 6.7, 8.5$  Hz, 1H), 3.96 (dd,  $J = 5.5, 8.5$  Hz, 1H), 1.44 (s, 3H), 1.37 (s, 3H);  $^{13}\text{C}$  NMR (125 MHz,  $\text{CDCl}_3$ )  $\delta$

153.2, 137.8, 128.4, 128.3, 128.0, 109.2, 84.6, 83.9, 74.1, 72.5, 66.2, 61.7, 26.7, 25.3; HRMS calcd for  $C_{16}H_{23}INO_4$   $[M + NH_4]^+$  420.0672, found 420.0674.

**(S)-4-((2R,3S)-3-(benzyloxy)-4-bromo-2,3-dihydrofuran-2-yl)-2,2-dimethyl-1,3-dioxolane (11b)**

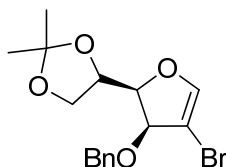

To a stirred solution of **11** (50 mg, 0.18 mmol) in dry  $CH_3CN$  (2 mL) at 80 °C under  $N_2$  atmosphere were added NBS (38.6 mg, 0.21 mmol) and  $AgNO_3$  (6.1 mg, 0.036 mmol) successively and stirred for 30 min. On consumption of starting material (TLC monitoring), the reaction mixture was filtered through sintered funnel and the filtrate was evaporated to give a crude product which was purified by silica gel column chromatography (1–5% of EtOAc/hexane) to obtain **11b** (23 mg, 35%) as a colorless oil.  $R_f$  0.20 (hexane:ethyl acetate, 4:1); IR (neat)  $\nu_{max}$  2924, 2853, 1619, 1454, 1370, 1253, 1213, 1066  $cm^{-1}$ ;  $^1H$  NMR (500 MHz,  $CDCl_3$ )  $\delta$  7.38–7.25 (m, 5H), 6.60 (s, 1H), 4.77 (d,  $J$  = 11.6 Hz, 1H), 4.73 (d,  $J$  = 11.6 Hz, 1H), 4.58 (d,  $J$  = 6.7 Hz, 1H), 4.49–4.43 (m, 2H), 4.09 (dd,  $J$  = 6.1, 9.1 Hz, 1H), 3.97 (dd,  $J$  = 5.5, 9.1 Hz, 1H), 1.44 (s, 3H), 1.37 (s, 3H);  $^{13}C$  NMR (100 MHz,  $CDCl_3$ )  $\delta$  136.8, 128.6, 128.2, 128.0, 127.8, 100.2, 108.1, 84.6, 82.4, 73.1, 72.7, 47.0, 26.7, 25.4 (the product was not very stable).

**(E)-methyl 3-((2R,3S,4R)-3,4-bis(benzyloxy)-2-(benzyloxymethyl)-3,4-dihydro-2H-pyran-5-yl)acrylate (12)**

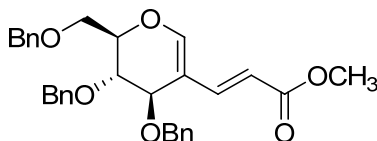

To a stirred solution of **2a** (50 mg, 0.092 mmol) in DMF (1.0 mL), were added Pd(OAc)<sub>2</sub> (2.0 mg, 0.009 mmol), PPh<sub>3</sub> (4.8 mg, 0.018 mmol), methyl acrylate (0.016 mL, 0.184 mmol) followed by K<sub>2</sub>CO<sub>3</sub> (25.4 mg, 0.184 mmol) under N<sub>2</sub> atmosphere. The reaction mixture was stirred for 3 h at 90 °C. After confirmation of the completion of the reaction by TLC, the mixture diluted with water and extracted from diethyl ether (3 × 10 mL), and the combined organic extracts were washed with water (1 × 10 mL), brine (1 × 10 mL), and then dried over Na<sub>2</sub>SO<sub>4</sub>. Concentration in *vacuo* gave a crude residue which was purified by silica gel column chromatography (10–15% of EtOAc/hexane) to obtain **12** (39 mg, 85%) as a colorless oil. *R*<sub>f</sub> 0.40 (hexane:ethyl acetate, 3:1); [ $\alpha$ ]<sub>D</sub><sup>28</sup> = +37.7 (*c* 0.45, CH<sub>2</sub>Cl<sub>2</sub>); IR (neat)  $\nu_{\text{max}}$  3031, 2925, 2855, 1714, 1622, 1496, 1435, 1311, 1284, 1164, 1027 cm<sup>-1</sup>; <sup>1</sup>H NMR (500 MHz, CDCl<sub>3</sub>)  $\delta$  7.37–7.18 (m, 16H), 6.92 (s, 1H), 5.66 (d, *J* = 15.9 Hz, 1H), 4.66 (d, *J* = 12.2 Hz, 1H), 4.61 (d, *J* = 12.2 Hz, 1H), 4.53 (br s, 1H), 4.49 (d, *J* = 12.2 Hz, 1H), 4.44–4.41 (m, 3H), 4.15 (s, 1H), 3.99 (t, *J* = 3.0 Hz, 1H), 3.76 (dd, *J* = 6.7, 10.4 Hz, 1H), 3.71 (s, 3H), 3.63 (dd, *J* = 4.9, 10.4 Hz, 1H); <sup>13</sup>C NMR (125 MHz, CDCl<sub>3</sub>)  $\delta$  167.9, 152.2, 143.2, 137.8–127.7 (ArC), 112.7, 111.1, 76.5, 73.4, 71.9, 70.7, 70.1, 70.0, 68.0, 51.4; HRMS calcd for C<sub>31</sub>H<sub>33</sub>O<sub>6</sub> [M + H]<sup>+</sup> 501.2277, found 501.2279.

**(E)-4-((2R,3S,4R)-3,4-bis(benzyloxy)-2-(benzyloxymethyl)-3,4-dihydro-2H-pyran-5-yl)but-3-en-2-one (13)**

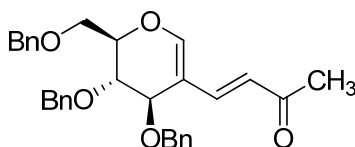

To a stirred solution of **2a** (50 mg, 0.092 mmol) in DMF (1.0 mL), were added Pd(OAc)<sub>2</sub> (2.0 mg, 0.009 mmol), PPh<sub>3</sub> (4.8 mg, 0.018 mmol), methyl vinyl ketone (0.015 mL, 0.184 mmol) followed by K<sub>2</sub>CO<sub>3</sub> (25.4 mg, 0.184 mmol) under N<sub>2</sub> atmosphere. The reaction mixture was stirred for 3 h at 90 °C. After confirmation of the completion of the reaction by TLC, the mixture diluted with water and extracted from diethyl ether (3 × 10 mL), and the combined organic extracts were washed with water (1 × 10 mL), brine (1 × 10 mL), and then dried over Na<sub>2</sub>SO<sub>4</sub>. Concentration in *vacuo* gave a crude residue which was purified by silica gel column chromatography (20–25% of EtOAc/hexane) to obtain **13** (34 mg, 76%) as a colorless oil. *R*<sub>f</sub> 0.30 (hexane:ethyl acetate, 3:1); [ $\alpha$ ]<sub>D</sub><sup>28</sup> = +43.4 (*c* 0.35, CH<sub>2</sub>Cl<sub>2</sub>); IR (neat)  $\nu_{\text{max}}$  2924, 2854, 1714, 1662, 1588, 1454, 1360, 1255, 1173, 1069, 1027 cm<sup>-1</sup>; <sup>1</sup>H NMR (400 MHz, CDCl<sub>3</sub>)  $\delta$  7.38–7.17 (m, 15H), 7.08 (d, *J* = 16.0 Hz, 1H), 6.96 (s, 1H), 5.90 (d, *J* = 16.0 Hz, 1H), 4.67 (d, *J* = 12.3 Hz, 1H), 4.61 (d, *J* = 12.3 Hz, 1H), 4.58–4.56 (m, 1H), 4.49–4.39 (m, 4H), 4.13 (br s, 1H), 4.00 (t, *J* = 2.7 Hz, 1H), 3.76 (dd, *J* = 7.0, 10.5 Hz, 1H), 3.63 (dd, *J* = 5.2, 10.5 Hz, 1H), 2.17 (s, 3H); <sup>13</sup>C NMR (100 MHz, CDCl<sub>3</sub>)  $\delta$  198.0, 152.9, 142.1, 137.7–127.8 (ArC), 122.6, 111.1, 76.6, 73.5, 71.9, 70.9, 69.8, 69.5, 68.0, 27.5; HRMS calcd for C<sub>31</sub>H<sub>33</sub>O<sub>5</sub> [M + H]<sup>+</sup> 485.2328, found 485.2322.

**3-((2*R*,3*S*,4*R*)-3,4-bis(benzyloxy)-2-(benzyloxymethyl)-3,4-dihydro-2*H*-pyran-5-yl)acrylonitrile (**14**)**

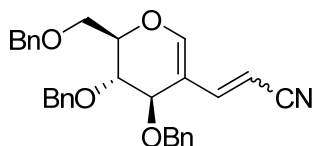

To a stirred solution of **2a** (50 mg, 0.092 mmol) in DMF (1.0 mL), were added Pd(OAc)<sub>2</sub> (2.0 mg, 0.009 mmol), PPh<sub>3</sub> (4.8 mg, 0.018 mmol), acrylonitrile (0.012 mL, 0.184 mmol) followed by K<sub>2</sub>CO<sub>3</sub> (25.4 mg, 0.184 mmol) under N<sub>2</sub> atmosphere. The reaction mixture was stirred for 3 h at 90 °C. After confirmation of the completion of the reaction by TLC, the mixture diluted with water and extracted from diethyl ether (3 × 10 mL), and the combined organic extracts were washed with water (1 × 10 mL), brine (1 × 10 mL), and then dried over Na<sub>2</sub>SO<sub>4</sub>. Concentration in *vacuo* gave a crude residue which was purified by silica gel column chromatography (20–25% of EtOAc/hexane) to obtain **14** (30 mg, 71%) as a colorless oil. *R*<sub>f</sub> 0.40 (hexane:ethyl acetate, 3:1); IR (neat)  $\nu_{\text{max}}$  2923, 2853, 2210, 1621, 1496, 1454, 1376, 1293, 1180, 1069, 1027 cm<sup>-1</sup>; <sup>1</sup>H NMR (400 MHz, CDCl<sub>3</sub>, E:Z; 4:1 mixture of diastereomer)  $\delta$  7.39–7.14 (m, 15H, both isomers), 6.98 (s, 1H, minor isomer), 6.87 (s, 1H, major isomer), 6.84 (d, *J* = 16.4 Hz, 1H, major isomer), 6.45 (d, *J* = 12.3 Hz, 1H, minor isomer), 4.99 (d, *J* = 12.3 Hz, 1H, minor isomer), 4.84 (br s, 1H, minor isomer), 4.79 (m, *J* = 16.4 Hz, 1H, major isomer), 4.73 (t, *J* = 2.2 Hz, 1H, minor isomer), 4.70–4.67 (m, 2H, major isomer), 4.62 (br s, 1H, major isomer), 4.59 (br s, 1H, minor isomer), 4.57–4.52 (m, 1H, both isomers), 4.49 (br s, 1H, major isomer), 4.46–4.41 (m, 5H, 2H major isomer, 3H minor isomer), 4.38 (br s, 1H, minor isomer), 4.07–4.03 (m, 1H, both isomers), 3.77–3.72 (m 1H, both isomers), 3.65 (dd, *J* = 5.5, 10.5 Hz, 1H, major isomer), 3.56 (dd, *J* = 5.0, 10.5 Hz, 1H, minor isomer); <sup>13</sup>C NMR (100 MHz, CDCl<sub>3</sub>, 4:1 mixture of diastereomer)  $\delta$  152.6, 152.0, 147.6, 145.5, 137.8–127.6 (ArC), 119.2, 112.7, 112.6, 90.6, 89.0, 77.3, 76.8, 73.7, 73.6, 72.9, 72.8, 72.4, 68.6, 68.2, 67.9; HRMS calcd for C<sub>30</sub>H<sub>33</sub>N<sub>2</sub>O<sub>4</sub> [M + NH<sub>4</sub>]<sup>+</sup> 485.2440, found 485.2440.

**(*E*)-methyl 3-((2*R*,3*R*,4*R*)-3,4-bis(benzyloxy)-2-(benzyloxymethyl)-3,4-dihydro-2*H*-pyran-5-yl)acrylate (15)**

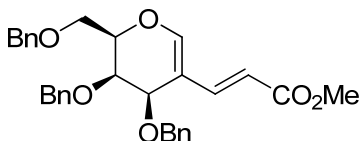

To a stirred solution of **4a** (50 mg, 0.092 mmol) in DMF (1.0 mL), were added Pd(OAc)<sub>2</sub> (2.0 mg, 0.009 mmol), PPh<sub>3</sub> (4.8 mg, 0.018 mmol), methyl acrylate (0.016 mL, 0.184 mmol) followed by K<sub>2</sub>CO<sub>3</sub> (25.4 mg, 0.184 mmol) under N<sub>2</sub> atmosphere. The reaction mixture was stirred for 2 h at 90 °C. After confirmation of the completion of the reaction by TLC, the mixture diluted with water and extracted from diethyl ether (3 × 10 mL), and the combined organic extracts were washed with water (1 × 10 mL), brine (1 × 10 mL), and then dried over Na<sub>2</sub>SO<sub>4</sub>. Concentration in *vacuo* gave a crude residue which was purified by silica gel column chromatography (10–15% of EtOAc/hexane) to obtain **15** (42 mg, 90%) as a colorless oil. *R<sub>f</sub>* 0.30 (hexane:ethyl acetate, 3:1); [ $\alpha$ ]<sub>D</sub><sup>28</sup> = +25.4 (*c* 0.55, CH<sub>2</sub>Cl<sub>2</sub>); IR (neat)  $\nu_{\text{max}}$  2920, 1724, 1638, 1453, 1272, 1206, 1107, 1027 cm<sup>-1</sup>; <sup>1</sup>H NMR (400 MHz, CDCl<sub>3</sub>)  $\delta$  7.36–7.27 (m, 15H), 7.25 (d, *J* = 16.0 Hz, 1H), 7.17 (s, 1H), 5.68 (d, *J* = 16.0 Hz, 1H), 4.92 (d, *J* = 11.0 Hz, 1H), 4.72 (d, *J* = 11.0 Hz, 1H), 4.66 (d, *J* = 10.5 Hz, 1H), 4.64 (d, *J* = 10.5 Hz, 1H), 4.57–4.54 (m, 1H), 4.56 (d, *J* = 12.0 Hz, 1H), 4.42 (d, *J* = 12.0 Hz, 1H), 4.32–4.31 (m, 1H), 4.01–3.93 (m, 2H), 3.89–3.86 (m, 1H), 3.70 (s, 3H); <sup>13</sup>C NMR (125 MHz, CDCl<sub>3</sub>)  $\delta$  170.0, 154.4, 145.5, 140.8, 140.3, 131.4–130.5 (ArC), 115.4, 115.3, 79.4, 77.1, 77.0, 76.0, 75.3, 71.6, 70.9, 54.2; HRMS calcd for C<sub>31</sub>H<sub>33</sub>O<sub>6</sub> [*M* + H]<sup>+</sup> 501.2277, found 501.2274.

**(*E*)-4-((2*R*,3*R*,4*R*)-3,4-bis(benzyloxy)-2-(benzyloxymethyl)-3,4-dihydro-2H-pyran-5-yl)but-3-en-2-one (16)**

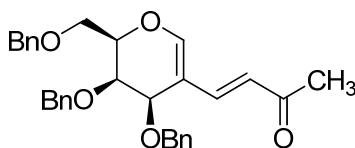

To a stirred solution of **4a** (50 mg, 0.092 mmol) in DMF (1.0 mL), were added Pd(OAc)<sub>2</sub> (2.0 mg, 0.009 mmol), PPh<sub>3</sub> (4.8 mg, 0.018 mmol), methyl vinyl ketone (0.015 mL, 0.184 mmol) followed by K<sub>2</sub>CO<sub>3</sub> (25.4 mg, 0.184 mmol) under N<sub>2</sub> atmosphere. The reaction mixture was stirred for 3 h at 90 °C. After confirmation of the completion of the reaction by TLC, the mixture diluted with water and extracted from diethyl ether (3 × 10 mL), and the combined organic extracts were washed with water (1 × 10 mL), brine (1 × 10 mL), and then dried over Na<sub>2</sub>SO<sub>4</sub>. Concentration in *vacuo* gave a crude residue which was purified by silica gel column chromatography (20–25% of EtOAc/hexane) to obtain **16** (37 mg, 83%) as a colorless oil. *R<sub>f</sub>* 0.20 (hexane:ethyl acetate, 2:1); [ $\alpha$ ]<sub>D</sub><sup>28</sup> = +79.2 (*c* 0.55, CH<sub>2</sub>Cl<sub>2</sub>); IR (neat)  $\nu_{\text{max}}$  2923, 2857, 1722, 1676, 1587, 1453, 1360, 1255, 1171, 1102, 1027 cm<sup>-1</sup>; <sup>1</sup>H NMR (500 MHz, CDCl<sub>3</sub>)  $\delta$  7.37–7.23 (m, 15H), 7.04 (d, *J* = 16.0 Hz, 1H), 6.81 (s, 1H), 5.97 (d, *J* = 16.0 Hz, 1H), 4.94 (d, *J* = 10.9 Hz, 1H), 4.75 (d, *J* = 12.0 Hz, 1H), 4.70–4.65 (m, 2H), 4.66 (d, *J* = 10.9 Hz, 1H), 4.57 (d, *J* = 12.0 Hz, 1H), 4.44 (d, *J* = 12.0, 1H), 4.34 (d, *J* = 2.2 Hz, 1H), 4.03–3.99 (m, 3H), 2.18 (s, 3H); <sup>13</sup>C NMR (125 MHz, CDCl<sub>3</sub>)  $\delta$  197.9, 152.2, 142.4, 138.0–122.7 (ArC), 122.6, 112.7, 74.4, 74.2, 73.5, 72.6, 68.8, 68.1, 27.5; HRMS calcd for C<sub>31</sub>H<sub>33</sub>O<sub>5</sub> [M + H]<sup>+</sup> 485.2328, found 485.2322.

**3-((2*R*,3*R*,4*R*)-3,4-bis(benzyloxy)-2-(benzyloxymethyl)-3,4-dihydro-2*H*-pyran-5-yl)acrylonitrile (**17**)**

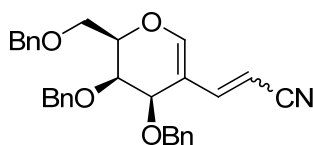



To a stirred solution of **4a** (50 mg, 0.092 mmol) in DMF (1.0 mL), were added Pd(OAc)<sub>2</sub> (2.0 mg, 0.009 mmol), PPh<sub>3</sub> (4.8 mg, 0.018 mmol), acrylonitrile (0.012 mL, 0.184 mmol) followed by K<sub>2</sub>CO<sub>3</sub> (25.4 mg, 0.184 mmol) under N<sub>2</sub> atmosphere. The reaction mixture was stirred for 1.5 h at 90 °C. After confirmation of the completion of the reaction by TLC, the mixture diluted with water and extracted from diethyl ether (3 × 10 mL), and the combined organic extracts were washed with water (1 × 10 mL), brine (1 × 10 mL), and then dried over Na<sub>2</sub>SO<sub>4</sub>. Concentration in *vacuo* gave a crude residue which was purified by silica gel column chromatography (25–20% of EtOAc/hexane) to obtain **17** (34 mg, 79%) as a colorless oil. *R*<sub>f</sub> 0.30 (hexane:ethyl acetate, 3:1); IR (neat)  $\nu_{\text{max}}$  2922, 2856, 2209, 1618, 1453, 1370, 1263, 1175, 1096, 1027 cm<sup>-1</sup>; <sup>1</sup>H NMR (500 MHz, CDCl<sub>3</sub>, E:Z; 4:1 mixture of diastereomer)  $\delta$  7.30–7.20 (m, 15H, both isomers), 6.84 (s, 1H, minor isomer), 6.73 (d, *J* = 16.4 Hz, 1H, major isomer), 6.66 (s, 1H, major isomer), 6.41 (d, *J* = 12.3 Hz, 1H, minor isomer), 4.95 (d, *J* = 12.3 Hz, 1H, minor isomer), 4.90 (br s, 1H, minor isomer), 4.86–4.82 (m, 3H, 2H major isomer, 1H minor isomer), 4.76 (d, *J* = 12.0 Hz, 1H, minor isomer), 4.69 (d, *J* = 12.0 Hz, 1H, major isomer), 4.64–4.61 (m, 1H, both isomers), 4.53 (d, *J* = 12.0 Hz, 1H, major isomer), 4.52–4.47 (m, 5H, 2H major isomer, 3H minor isomer), 4.41–4.38 (m, 1H, both isomers), 4.21 (t, *J* = 3.3 Hz, 1H, major isomer), 4.02 (t, *J* = 3.4 Hz, 1H, minor isomer), 3.97 (t, *J* = 4.0 Hz, 1H, major isomer), 3.89–3.84 (m, 3H, 1H major isomer, 2H minor isomer), 3.81 (dd, *J* = 2.9, 10.9 Hz, 1H, major isomer); <sup>13</sup>C NMR (125 MHz, CDCl<sub>3</sub>, 4:1 mixture of diastereomer)  $\delta$  152.6, 152.0, 147.6, 145.5, 137.8–127.6 (ArC), 112.7, 112.6, 90.6, 89.0, 76.9, 76.8, 73.6, 72.8, 68.6, 68.2, 67.9; HRMS calcd for C<sub>30</sub>H<sub>33</sub>N<sub>2</sub>O<sub>4</sub> [M + NH<sub>4</sub>]<sup>+</sup> 485.2440, found 485.2443.

**3-((2*R*,3*S*,4*R*)-3,4-bis(benzyloxy)-2-(benzyloxymethyl)-3,4-dihydro-2*H*-pyran-5-yl)propanal**  
**(18)**

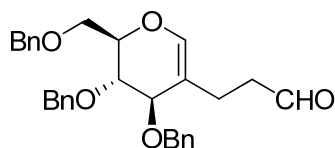

To a stirred solution of **2a** (50 mg, 0.092 mmol) in DMF (2.0 mL), were added Pd(OAc)<sub>2</sub> (2.0 mg, 0.009 mmol), PPh<sub>3</sub> (4.8 mg, 0.018 mmol), allyl alcohol (0.018 mL, 0.276 mmol) followed by K<sub>2</sub>CO<sub>3</sub> (25.4 mg, 0.184 mmol) under N<sub>2</sub> atmosphere. The reaction mixture was stirred for 8 h at 100 °C. After confirmation of the completion of the reaction by TLC, the mixture diluted with water and extracted from diethyl ether (3 × 10 mL), and the combined organic extracts were washed with water (1 × 10 mL), brine (1 × 10 mL), and then dried over Na<sub>2</sub>SO<sub>4</sub>. Concentration *in vacuo* gave a crude residue which was purified by silica gel column chromatography (10–15% of EtOAc/hexane) to obtain **18** (27 mg, 61%) as a colorless oil. *R<sub>f</sub>* 0.40 (hexane:ethyl acetate, 3:1);  $[\alpha]_D^{28} = +28.8$  (*c* 0.45, CH<sub>2</sub>Cl<sub>2</sub>); IR (neat)  $\nu_{\text{max}}$  2861, 1722, 1666, 1496, 1454, 1363, 1157, 1069, 1027 cm<sup>-1</sup>; <sup>1</sup>H NMR (500 MHz, CDCl<sub>3</sub>)  $\delta$  9.64 (s, 1H), 7.32–7.23 (m, 15H), 6.27 (s, 1H), 4.69 (d, *J* = 11.6 Hz, 1H), 4.65 (d, *J* = 11.6 Hz, 1H), 4.59 (d, *J* = 11.0 Hz, 1H), 4.53 (br s, 2H), 4.43 (d, *J* = 11.6 Hz, 1H), 4.15 (dd, *J* = 5.5, 9.8 Hz, 1H), 3.95–3.91 (m, 2H), 3.77 (dd, *J* = 6.1, 10.3 Hz, 1H), 3.69–3.66 (m, 1H), 2.40–2.08 (m, 4H); <sup>13</sup>C NMR (125 MHz, CDCl<sub>3</sub>)  $\delta$  202.2, 141.1, 138.1–127.7 (ArC), 110.3, 75.9, 75.2, 73.6, 72.9, 71.5, 68.1, 42.7, 21.8; HRMS calcd for C<sub>30</sub>H<sub>36</sub>NO<sub>5</sub> [M + NH<sub>4</sub>]<sup>+</sup> 490.2593, found 490.2594.

**3-((2R,3R,4R)-3,4-bis(benzyloxy)-2-(benzyloxymethyl)-3,4-dihydro-2H-pyran-5-yl)propanal**  
(**19**)

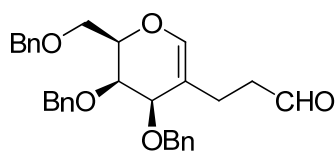

To a stirred solution of **4a** (50 mg, 0.092 mmol) in DMF (2.0 mL), were added Pd(OAc)<sub>2</sub> (2.0 mg, 0.009 mmol), PPh<sub>3</sub> (4.8 mg, 0.018 mmol), allyl alcohol (0.018 mL, 0.276 mmol) followed by K<sub>2</sub>CO<sub>3</sub> (25.4 mg, 0.184 mmol) under N<sub>2</sub> atmosphere. The reaction mixture was stirred for 5 h at 100 °C. After confirmation of the completion of the reaction by TLC, the mixture diluted with water and extracted from diethyl ether (3 × 10 mL), and the combined organic extracts were washed with water (1 × 10 mL), brine (1 × 10 mL), and then dried over Na<sub>2</sub>SO<sub>4</sub>. Concentration in *vacuo* gave a crude residue which was purified by silica gel column chromatography (10–15% of EtOAc/hexane) to obtain **19** (23 mg, 53%) as a colorless oil. *R*<sub>f</sub> 0.40 (hexane:ethyl acetate, 3:1); [ $\alpha$ ]<sub>D</sub><sup>28</sup> = +20.0 (*c* 0.50, CH<sub>2</sub>Cl<sub>2</sub>); IR (neat)  $\nu_{\text{max}}$  2921, 2855, 1721, 1663, 1496, 1453, 1347, 1206, 1142, 1094, 1027 cm<sup>-1</sup>; <sup>1</sup>H NMR (500 MHz, CDCl<sub>3</sub>)  $\delta$  9.62 (s, 1H), 7.34–7.25 (m, 15H), 6.16 (s, 1H), 4.80 (d, *J* = 11.6 Hz, 1H), 4.79 (d, *J* = 11.6 Hz, 1H), 4.64 (d, *J* = 11.6 Hz, 1H), 4.52 (d, *J* = 11.6 Hz, 1H), 4.48 (d, *J* = 11.6 Hz, 1H), 4.43 (d, *J* = 11.6 Hz, 1H), 4.19 (br s, 1H), 4.07 (br s, 1H), 4.01–4.00 (m, 1H), 3.76 (dd, *J* = 7.3, 10.3 Hz, 1H), 3.68 (dd, *J* = 4.8, 10.3 Hz, 1H), 2.39–2.23 (m, 4H); <sup>13</sup>C NMR (125 MHz, CDCl<sub>3</sub>)  $\delta$  202.4, 140.0, 138.2–127.8 (ArC), 110.7, 75.3, 73.5, 73.4, 72.9, 72.8, 68.2, 42.9, 21.9; HRMS calcd for C<sub>30</sub>H<sub>36</sub>NO<sub>5</sub> [M + NH<sub>4</sub>]<sup>+</sup> 490.2593, found 490.2594.

**(2*R*,3*R*,4*R*)-2-(acetoxymethyl)-5-((*E*)-3-methoxy-3-oxoprop-1-enyl)-3,4-dihydro-2*H*-pyran-3,4-diyl diacetate (**20**)**

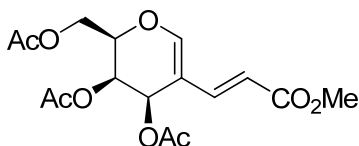

To a stirred solution of **6a** (100 mg, 0.251 mmol) in DMF (3.0 mL), were added Pd(OAc)<sub>2</sub> (5.6 mg, 0.025 mmol), PPh<sub>3</sub> (13.1 mg, 0.050 mmol), methyl acrylate (0.045 mL, 0.502 mmol) followed by Et<sub>3</sub>N (0.070 mL, 0.502 mmol) under N<sub>2</sub> atmosphere. The reaction mixture was stirred for 1 h at 90 °C. After confirmation of the completion of the reaction by TLC, the mixture diluted with water and extracted from diethyl ether (2 × 20 mL), and the combined organic extracts were washed with water (1 × 10 mL), brine (1 × 10 mL), and then dried over Na<sub>2</sub>SO<sub>4</sub>. Concentration in *vacuo* gave a crude residue which was purified by silica gel column chromatography (25–30% of EtOAc/hexane) to obtain **20** (84 mg, 94%) as a colorless oil. *R<sub>f</sub>* 0.30 (hexane:ethyl acetate, 2:1);  $[\alpha]_D^{28} = +43.9$  (*c* 0.30, CH<sub>2</sub>Cl<sub>2</sub>); IR (neat)  $\nu_{\max}$  2923, 2852, 1746, 1626, 1435, 1371, 1228, 1165, 1044, 1020 cm<sup>-1</sup>; <sup>1</sup>H NMR (400 MHz, CDCl<sub>3</sub>)  $\delta$  7.15 (d, *J* = 16.0 Hz, 1H), 6.90 (s, 1H), 5.85 (d, *J* = 4.1 Hz, 1H), 5.59 (d, *J* = 16.0 Hz, 1H), 5.43 (t, *J* = 4.1 Hz, 1H), 4.43–4.37 (m, 2H), 4.26 (d, *J* = 9.1 Hz, 1H), 3.70 (s, 3H), 2.08 (s, 6H), 2.06 (s, 3H); <sup>13</sup>C NMR (100 MHz, CDCl<sub>3</sub>)  $\delta$  170.6, 170.3, 169.6, 167.5, 152.1, 140.3, 114.2, 110.3, 73.7, 64.7, 61.7, 61.5, 51.6, 20.8, 20.6; HRMS calcd for C<sub>16</sub>H<sub>20</sub>NaO<sub>9</sub> [M + Na]<sup>+</sup> 379.1005, found 379.1000.

### **Preparation of 21 and 22**

To a stirred solution of **2a** (100 mg, 0.184 mmol) in DMF (3.0 mL), were added Pd(OAc)<sub>2</sub> (4.1 mg, 0.018 mmol), PPh<sub>3</sub> (9.6 mg, 0.036 mmol), 2-bromostyrene (37.0 mg, 0.202 mmol) followed by K<sub>2</sub>CO<sub>3</sub> (25.4 mg, 0.184 mmol) under N<sub>2</sub> atmosphere. The reaction mixture was stirred for 2 h at 100 °C. After confirmation of the completion of the reaction by TLC, the mixture diluted with water and extracted from diethyl ether (3 × 10 mL), and the combined organic extracts were washed with water (1 × 10 mL), brine (1 × 10 mL), and then dried over Na<sub>2</sub>SO<sub>4</sub>. Concentration

in *vacuo* gave a crude residue which was separated by silica gel column chromatography (5–10% of EtOAc/hexane) to afford **21** (61 mg, 56%) and **22** (21 mg, 19%) as a colorless oils.

**(2*R*,3*S*,4*R*)-3,4-bis(benzyloxy)-2-(benzyloxymethyl)-5-(2-bromostyryl)-3,4-dihydro-2*H*-pyran (21)**

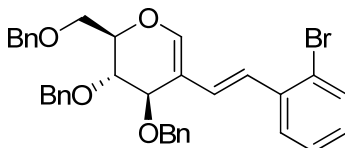

$R_f$  0.40 (hexane:ethyl acetate, 4:1);  $[\alpha]_D^{28} = +37.3$  ( $c$  0.75,  $\text{CH}_2\text{Cl}_2$ ); IR (neat)  $\nu_{\text{max}}$  2923, 2855, 1632, 1465, 1453, 1362, 1267, 1165, 1026  $\text{cm}^{-1}$ ;  $^1\text{H}$  NMR (500 MHz,  $\text{CDCl}_3$ )  $\delta$  7.53–7.51 (m, 2H, *ArH*), 7.36–7.01 (m, 17H, *ArH*), 6.83 (d,  $J = 16.0$  Hz, 1H), 6.80(s, 1H), 6.60 (d,  $J = 16.0$  Hz, 1H), 4.70 (d,  $J = 12.0$  Hz, 1H), 4.65 (br s, 1H), 4.64 (d,  $J = 10.8$  Hz, 1H), 4.54 (d,  $J = 10.8$  Hz, 1H), 4.53–4.52 (m, 1H), 4.51 (d,  $J = 12.0$  Hz, 1H), 4.43 (d,  $J = 12.0$  Hz, 1H), 4.53 (br s, 1H), 3.99 (t,  $J = 2.8$  Hz, 1H), 3.80 (dd,  $J = 6.9, 10.3$  Hz, 1H), 3.66 (dd,  $J = 5.1, 10.3$  Hz, 1H);  $^{13}\text{C}$  NMR (125 MHz,  $\text{CDCl}_3$ )  $\delta$  147.1, 137.9–122.5 (*ArC*), 76.0, 73.4, 71.9, 71.3, 71.1, 70.8, 68.2; HRMS calcd for  $\text{C}_{35}\text{H}_{37}\text{BrNO}_4$   $[\text{M} + \text{NH}_4]^+$  614.1906, found 614.1908.

**(2*R*,3*S*,4*R*)-3,4-bis(benzyloxy)-2-(benzyloxymethyl)-5-(1-(2-bromophenyl)vinyl)-3,4-dihydro-2*H*-pyran (22)**

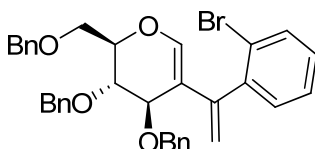

$R_f$  0.60 (hexane:ethyl acetate, 4:1);  $[\alpha]_D^{28} = +9.0$  ( $c$  0.55,  $\text{CH}_2\text{Cl}_2$ ); IR (neat)  $\nu_{\text{max}}$  2922, 2854, 1453, 1360, 1269, 1094, 1026  $\text{cm}^{-1}$ ;  $^1\text{H}$  NMR (400 MHz,  $\text{CDCl}_3$ )  $\delta$  7.56–7.12 (m, 19H, ArH), 6.20 (s, 1H), 5.35 (s, 1H), 4.85 (s, 1H), 4.70 (d,  $J = 11.9$  Hz, 1H), 4.66 (d,  $J = 11.9$  Hz, 1H), 4.55 (d,  $J = 11.9$  Hz, 1H), 4.52–4.43 (m, 4H), 4.32 (br s, 1H), 4.01 (t,  $J = 3.6$  Hz, 1H), 3.80 (dd,  $J = 6.4, 10.0$  Hz, 1H), 3.68 (dd,  $J = 5.0, 10.5$  Hz, 1H);  $^{13}\text{C}$  NMR (125 MHz,  $\text{CDCl}_3$ )  $\delta$  146.3, 145.5, 141.9, 138.0–123.4 (ArC), 112.9, 112.0, 75.8, 73.4, 71.9, 71.8, 71.2, 70.1, 68.3; HRMS calcd for  $\text{C}_{35}\text{H}_{33}\text{BrNaO}_4$   $[\text{M} + \text{Na}]^+$  619.1460, found 619.1460.

**(2R,3S,4R)-2-(acetoxymethyl)-5-((E)-3-methoxy-3-oxoprop-1-enyl)-3,4-dihydro-2H-pyran-3,4-diyl diacetate (23)**

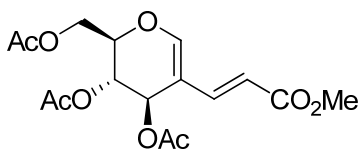

To a stirred solution of **5a** (100 mg, 0.251 mmol) in DMF (3.0 mL), were added  $\text{Pd}(\text{OAc})_2$  (5.6 mg, 0.025 mmol),  $\text{PPh}_3$  (13.1 mg, 0.050 mmol), methyl acrylate (0.045 mL, 0.502 mmol) followed by  $\text{Et}_3\text{N}$  (0.070 mL, 0.502 mmol) under  $\text{N}_2$  atmosphere. The reaction mixture was stirred for 1 h at 90  $^\circ\text{C}$ . After confirmation of the completion of the reaction by TLC, the mixture diluted with water and extracted from diethyl ether ( $2 \times 20$  mL), and the combined organic extracts were washed with water ( $1 \times 10$  mL), brine ( $1 \times 10$  mL), and then dried over  $\text{Na}_2\text{SO}_4$ . Concentration in *vacuo* gave a crude residue which was purified by silica gel column chromatography (25–30% of EtOAc/hexane) to obtain **23** (79 mg, 89%) as a colorless oil.  $R_f$  0.30 (hexane:ethyl acetate, 2:1);  $^1\text{H}$  NMR (400 MHz,  $\text{CDCl}_3$ )  $\delta$  7.19 (d,  $J = 16.0$  Hz, 1H), 6.96 (s, 1H), 5.60 (d,  $J = 16.0$  Hz, 1H), 5.57 (d,  $J = 2.3$  Hz, 1H), 5.13 (t,  $J = 3.6$  Hz, 1H), 4.49–4.40

(m, 2H), 4.16 (d,  $J = 3.6, 11.4$  Hz, 1H), 3.70 (s, 3H), 2.07 (s, 3H), 2.06 (s, 3H), 2.05 (s, 3H);  $^{13}\text{C}$  NMR (100 MHz,  $\text{CDCl}_3$ )  $\delta$  170.4, 169.9, 169.4, 167.5, 152.3, 141.1, 113.8, 109.4, 74.4, 66.4, 62.7, 61.1, 51.6, 20.8, 20.6.

**((2*R*,3*R*)-3-acetoxy-5-iodo-6-methoxy-3,6-dihydro-2*H*-pyran-2-yl)methyl acetate (**24**)**

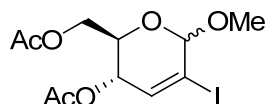

To a stirred solution of an acetylated 2-iodoglucal **5a** (100 mg, 0.251 mmol) and  $\text{CH}_3\text{OH}$  (0.013 mL, 0.301 mmol) in dry  $\text{CH}_2\text{Cl}_2$  (2 mL) at room temperature under  $\text{N}_2$  atmosphere was added  $\text{BF}_3\cdot\text{OEt}_2$  (0.053 mL, 0.502 mmol) and the reaction mixture was stirred for 2 h. After the consumption of starting material (TLC monitoring), the reaction mixture was quenched with  $\text{NaHCO}_3$  (5.0 mL) solution and extracted with  $\text{CH}_2\text{Cl}_2$  ( $2 \times 10$  mL) and the combined organic extracts were washed with water ( $1 \times 10$  mL), brine ( $1 \times 10$  mL), and then dried over  $\text{Na}_2\text{SO}_4$ . Evaporation of solvents under vacuum gave a crude residue which was purified by silica gel column chromatography (5–10% of EtOAc/hexane) to obtain **24** (85 mg, 92%) as a colorless oil.  $R_f$  0.50 (hexane:ethyl acetate, 3:1); IR (neat)  $\nu_{\text{max}}$  2917, 1742, 1637, 1438, 1369, 1228, 1108, 1050  $\text{cm}^{-1}$ ;  $^1\text{H}$  NMR (400 MHz,  $\text{CDCl}_3$ , 5:1 mixture of anomers)  $\delta$  6.60 (d,  $J = 4.0$  Hz, 1H, minor isomer), 6.46 (d,  $J = 2.3$  Hz, 1H, major isomer), 5.28 (d,  $J = 9.7$  Hz, 1H, major isomer), 5.10 (t,  $J = 4.0$  Hz, 1H, minor isomer), 4.96 (s, 1H, minor isomer), 4.89 (s, 1H, major isomer), 4.77–4.74 (m, 1H, minor isomer), 4.23–4.11 (m, 3H, major isomer), 4.01–3.98 (m, 1H, minor isomer), 3.60 (dd,  $J = 1.8, 8.0$  Hz, 1H, minor isomer), 3.47 (s, 3H, minor isomer), 3.45 (s, 3H, major isomer), 2.11 (s, 3H, minor isomer), 2.08 (s, 3H, minor isomer), 2.07 (s, 6H, major isomer);  $^{13}\text{C}$  NMR (100 MHz,  $\text{CDCl}_3$ , 5:1 mixture of anomers)  $\delta$  170.8, 170.1, 137.8, 136.2, 130.1, 100.6,

96.7, 73.2, 69.9, 67.2, 66.2, 63.6, 63.0, 56.7, 55.4, 20.9, 20.8; HRMS calcd for  $C_{11}H_{15}INaO_6$  [ $M + Na$ ] $^+$  392.9811, found 392.9816.

**((2*R*,3*S*)-3-acetoxy-6-(allyloxy)-5-iodo-3,6-dihydro-2*H*-pyran-2-yl)methyl acetate (**25**)**

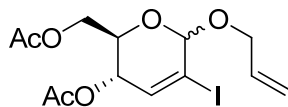

To a stirred solution of an acetylated 2-iodoglucal **5a** (100 mg, 0.251 mmol) and allyl alcohol (0.034 mL, 0.502 mmol) in dry  $CH_2Cl_2$  (2 mL) at room temperature under  $N_2$  atmosphere was added  $BF_3 \cdot OEt_2$  (0.053 mL, 0.502 mmol) and the reaction mixture was stirred for 2 h. After the consumption of starting material (TLC monitoring), the reaction mixture was quenched with  $NaHCO_3$  (5.0 mL) solution and extracted with  $CH_2Cl_2$  ( $2 \times 10$  mL) and the combined organic extracts were washed with water ( $1 \times 10$  mL), brine ( $1 \times 10$  mL), and then dried over  $Na_2SO_4$ . Evaporation of solvents under vacuum gave a crude residue which was purified by silica gel column chromatography (5–10% of EtOAc/hexane) to obtain **25** (86 mg, 87%) as a colorless oil.  $R_f$  0.60 (hexane:ethyl acetate, 3:1); IR (neat)  $\nu_{max}$  2923, 1744, 1637, 1427, 1370, 1224, 1105, 1042  $cm^{-1}$ ;  $^1H$  NMR (500 MHz,  $CDCl_3$ , 10:1 mixture of anomers)  $\delta$  6.60 (d,  $J = 4.0$  Hz, 1H, minor isomer), 6.46 (d,  $J = 2.3$  Hz, 1H, major isomer), 5.98–5.90 (m, 1H, both isomers), 5.37 (d,  $J = 1.7$  Hz, 1H, major isomer), 5.34 (d,  $J = 1.7$  Hz, 1H, major isomer), 5.29–5.23 (m, 1H, both isomers), 5.08–5.07 (m, 2H, minor isomer), 5.03 (s, 1H, both isomers), 4.26–4.23 (m, 1H, both isomers), 4.21–4.14 (m, 3H, both isomers), 4.12–4.08 (m, 1H, both isomers), 2.08 (s, 3H, both isomers), 2.07 (s, 3H, both isomers);  $^{13}C$  NMR (125 MHz,  $CDCl_3$ , 10:1 mixture of anomers)  $\delta$  170.7, 170.1, 137.8, 133.5, 118.2, 98.6, 97.0, 69.9, 67.3, 66.4, 62.7, 20.9, 20.8; HRMS calcd for  $C_{13}H_{17}INaO_6$  [ $M + Na$ ] $^+$  418.9968, found 418.9963.



**((2*R*,3*S*)-3-acetoxy-5-iodo-6-(((2*R*,3*R*,4*S*,5*R*,6*S*)-3,4,5-tris(benzyloxy)-6-methoxytetrahydro-2*H*-pyran-2-yl)methoxy)-3,6-dihydro-2*H*-pyran-2-yl)methyl acetate (**26**)**

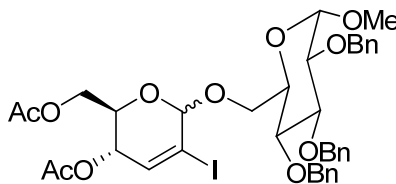

To a stirred solution of an acetylated 2-iodoglucal **5a** (50 mg, 0.125 mmol) and XOH (58.3 mg, 0.125 mmol) in dry CH<sub>2</sub>Cl<sub>2</sub> (3 mL) at room temperature under N<sub>2</sub> atmosphere was added BF<sub>3</sub>·OEt<sub>2</sub> (0.026 mL, 0.251 mmol) and the reaction mixture was stirred for 2 h. After the consumption of starting material (TLC monitoring), the reaction mixture was quenched with NaHCO<sub>3</sub> (5.0 mL) solution and extracted with CH<sub>2</sub>Cl<sub>2</sub> (2 × 10 mL) and the combined organic extracts were washed with water (1 × 10 mL), brine (1 × 10 mL), and then dried over Na<sub>2</sub>SO<sub>4</sub>. Evaporation of solvents under vacuum gave a crude residue which was purified by silica gel column chromatography (20–25% of EtOAc/hexane) to obtain **26** (66 mg, 66%) as a colorless oil. *R*<sub>f</sub> 0.30 (hexane:ethyl acetate, 3:1); IR (neat)  $\nu_{\text{max}}$  2927, 1745, 1637, 1453, 1369, 1229, 1029 cm<sup>-1</sup>; <sup>1</sup>H NMR (400 MHz, CDCl<sub>3</sub>, 10:2 mixture of anomers)  $\delta$  7.36–7.24 (m, 15H, both isomers), 6.56 (d, *J* = 2.0 Hz, 1H, minor isomer), 6.43 (d, *J* = 2.0 Hz, 1H, major isomer), 5.35–5.34 (m, 1H, minor isomer), 5.28–5.26 (m, 1H, major isomer), 5.16 (s, 1H, major isomer), 5.10 (t, *J* = 5.0 Hz, 1H, minor isomer), 5.04 (s, 1H, minor isomer), 4.97 (d, *J* = 10.9 Hz, 1H, major isomer), 4.92 (d, *J* = 10.9 Hz, 1H, major isomer), 4.83–4.77 (m, 2H, both isomer), 4.68 (d, *J* = 9.4 Hz, 1H, major isomer), 4.66–4.57 (m, 3H, minor isomer), 4.58 (d, *J* = 3.4 Hz, 1H, major isomer), 4.28–4.25 (m, 2H, minor isomers), 4.20–4.15 (m, 1H, both isomers), 4.13–4.09 (m, 2H, both isomers), 4.03–3.97 (m, 1H, both isomers), 3.86 (d, *J* = 3.2 Hz, 1H, minor isomer), 3.83 (d, *J* =

3.4 Hz, 1H, major isomer), 3.82–3.81 (m, 1H, both isomers), 3.78–3.69 (m, 2H, both isomer), 3.78–3.57 (m, 2H, major isomers), 3.39 (s, 3H, minor isomer), 3.37 (s, 3H, major isomer), 2.07 (s, 3H, both isomer), 2.03 (s, 3H, major isomer), 2.02 (s, 3H, minor isomer);  $^{13}\text{C}$  NMR (100 MHz,  $\text{CDCl}_3$ , 10:2 mixture of anomers)  $\delta$  170.7, 170.5, 170.0, 138.8–127.7 (ArC), 99.6, 98.3, 98.1, 96.9, 82.1, 82.0, 80.6, 79.6, 76.8, 75.8, 75.1, 73.4, 72.7, 71.0, 69.6, 67.3, 67.0, 66.8, 66.6, 63.2, 62.6, 55.4, 55.3, 20.9, 20.8; HRMS calcd for  $\text{C}_{38}\text{H}_{47}\text{INO}_{11}$   $[\text{M} + \text{NH}_4]^+$  820.2194, found 820.2191.

**((2*R*,3*R*,6*S*)-3-acetoxy-5-iodo-6-methoxy-3,6-dihydro-2*H*-pyran-2-yl)methyl acetate (**27**)**

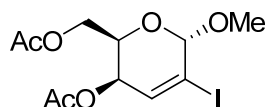

To a stirred solution of an acetylated 2-iodogalactal **6a** (100 mg, 0.251 mmol) and  $\text{CH}_3\text{OH}$  (0.013 mL, 0.301 mmol) in dry  $\text{CH}_2\text{Cl}_2$  (2 mL) at room temperature under  $\text{N}_2$  atmosphere was added  $\text{BF}_3\cdot\text{OEt}_2$  (0.053 mL, 0.502 mmol) and the reaction mixture was stirred for 2 h. After the consumption of starting material (TLC monitoring), the reaction mixture was quenched with  $\text{NaHCO}_3$  (5.0 mL) solution and extracted with  $\text{CH}_2\text{Cl}_2$  ( $2 \times 10$  mL) and the combined organic extracts were washed with water ( $1 \times 10$  mL), brine ( $1 \times 10$  mL), and then dried over  $\text{Na}_2\text{SO}_4$ . Evaporation of solvents under vacuum gave a crude residue which was purified by silica gel column chromatography (5–10% of EtOAc/hexane) to obtain **27** (79 mg, 85%) as a colorless oil.  $R_f$  0.60 (hexane:ethyl acetate, 3:1);  $[\alpha]_D^{28} = -128$  ( $c$  0.70,  $\text{CH}_2\text{Cl}_2$ ); IR (neat)  $\nu_{\text{max}}$  2928, 2832, 1745, 1635, 1370, 1228, 1191, 1055  $\text{cm}^{-1}$ ;  $^1\text{H}$  NMR (500 MHz,  $\text{CDCl}_3$ )  $\delta$  6.67 (d,  $J = 5.5$  Hz, 1H), 4.94 (s, 1H), 4.91 (d,  $J = 4.8$  Hz, 1H), 4.33 (br s, 1H), 4.20–4.19 (m, 2H), 3.46 (s, 3H), 2.08

(s, 3H), 2.06 (s, 3H);  $^{13}\text{C}$  NMR (100 MHz,  $\text{CDCl}_3$ )  $\delta$  170.6, 170.2, 134.4, 102.1, 100.5, 65.8, 65.3, 62.5, 56.3, 20.8; HRMS calcd for  $\text{C}_{11}\text{H}_{15}\text{INaO}_6$   $[\text{M} + \text{Na}]^+$  392.9811, found 392.9813.

**((2*R*,3*R*,6*S*)-3-acetoxy-6-(allyloxy)-5-iodo-3,6-dihydro-2*H*-pyran-2-yl)methyl acetate (**28**)**

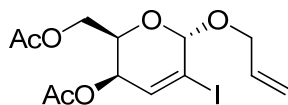

To a stirred solution of an acetylated 2-iodogalactal **6a** (100 mg, 0.251 mmol) and allyl alcohol (0.034 mL, 0.502 mmol) in dry  $\text{CH}_2\text{Cl}_2$  (2 mL) at room temperature under  $\text{N}_2$  atmosphere was added  $\text{BF}_3\cdot\text{OEt}_2$  (0.053 mL, 0.502 mmol) and the reaction mixture was stirred for 4 h. After the consumption of starting material (TLC monitoring), the reaction mixture was quenched with  $\text{NaHCO}_3$  (5.0 mL) solution and extracted with  $\text{CH}_2\text{Cl}_2$  ( $2 \times 10$  mL) and the combined organic extracts were washed with water ( $1 \times 10$  mL), brine ( $1 \times 10$  mL), and then dried over  $\text{Na}_2\text{SO}_4$ . Evaporation of solvents under vacuum gave a crude residue which was purified by silica gel column chromatography (5–10% of EtOAc/hexane) to obtain **28** (88 mg, 89%) as a colorless oil.  $R_f$  0.70 (hexane:ethyl acetate, 3:1);  $[\alpha]_D^{28} = -124.0$  ( $c$  0.48,  $\text{CH}_2\text{Cl}_2$ ); IR (neat)  $\nu_{\text{max}}$  2923, 2854, 1744, 1634, 1370, 1225, 1101, 1055, 1025  $\text{cm}^{-1}$ ;  $^1\text{H}$  NMR (400 MHz,  $\text{CDCl}_3$ )  $\delta$  6.68 (d,  $J = 5.4$  Hz, 1H), 5.98–5.89 (m, 1H), 5.34 (dd,  $J = 1.4, 17.4$  Hz, 1H), 5.23 (dd,  $J = 1.4, 10.5$  Hz, 1H), 5.08 (s, 1H), 4.37 (td,  $J = 2.2, 6.4$  Hz, 1H), 4.25–4.21 (m, 1H), 4.18–4.17 (m, 2H), 4.12–4.07 (m, 1H), 2.06 (s, 3H), 2.05 (s, 3H);  $^{13}\text{C}$  NMR (100 MHz,  $\text{CDCl}_3$ )  $\delta$  170.6, 170.2, 134.4, 133.5, 118.4, 102.1, 98.4, 69.5, 65.9, 65.4, 62.5, 20.8, 20.7; HRMS calcd for  $\text{C}_{13}\text{H}_{17}\text{INaO}_6$   $[\text{M} + \text{Na}]^+$  418.9968, found 418.9966.

**((2*R*,3*R*)-3-acetoxy-5-iodo-6-(((2*R*,3*R*,4*S*,5*R*,6*S*)-3,4,5-tris(benzyloxy)-6-methoxytetrahydro-2*H*-pyran-2-yl)methoxy)-3,6-dihydro-2*H*-pyran-2-yl)methyl acetate (**29**)**

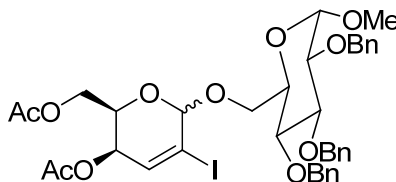

To a stirred solution of an acetylated 2-iodogalactal **6a** (50 mg, 0.125 mmol) and XOH (58.3 mg, 0.125 mmol) in dry CH<sub>2</sub>Cl<sub>2</sub> (3 mL) at room temperature under N<sub>2</sub> atmosphere was added BF<sub>3</sub>·OEt<sub>2</sub> (0.026 mL, 0.251 mmol) and the reaction mixture was stirred for 2 h. After the consumption of starting material (TLC monitoring), the reaction mixture was quenched with NaHCO<sub>3</sub> (5.0 mL) solution and extracted with CH<sub>2</sub>Cl<sub>2</sub> (2 × 10 mL) and the combined organic extracts were washed with water (1 × 10 mL), brine (1 × 10 mL), and then dried over Na<sub>2</sub>SO<sub>4</sub>. Evaporation of solvents under vacuum gave a crude residue which was purified by silica gel column chromatography (20–25% of EtOAc/hexane) to obtain **29** (53 mg, 53%) as a colorless oil. *R*<sub>f</sub> 0.30 (hexane:ethyl acetate, 3:1); IR (neat)  $\nu_{\text{max}}$  2923, 1744, 1637, 1454, 1370, 1227, 1104, 1027 cm<sup>-1</sup>; <sup>1</sup>H NMR (500 MHz, CDCl<sub>3</sub>, 2:1 mixture of anomers)  $\delta$  7.36–7.27 (m, 15H, both isomers), 6.77 (d, *J* = 5.6 Hz, 1H, major isomer), 6.65 (d, *J* = 5.5 Hz, 1H, minor isomer), 5.46 (s, 1H, major isomer), 5.22 (s, 1H, minor isomer), 5.01 (d, *J* = 2.4 Hz, 1H, minor isomer), 5.00–4.98 (m, 2H, minor isomer), 4.96 (d, *J* = 3.5 Hz, minor isomer), 4.95–4.83 (m, 2H, both isomers), 4.82–4.78 (m, 1H, both isomers), 4.68 (d, *J* = 4.9 Hz, 1H, minor isomer), 4.64 (d, *J* = 4.3 Hz, 1H, major isomer), 4.64–4.59 (m, 2H, both isomers), 4.57–4.55 (m, 1H, major isomer), 4.34–4.30 (m, 2H, minor isomer), 4.27–4.22 (m, 2H, both isomers), 4.19–4.17 (m, 1H, both isomers), 4.03–3.98 (m, 1H, major isomer), 3.87–3.81 (m, 1H, both isomers), 3.78–3.74 (m, 1H,

major isomer), 3.70–3.63 (m, 2H, minor isomers), 3.58–3.48 (m, 3H, 2H major isomer, 1H minor isomer), 3.37 (s, 3H, major isomer), 3.35 (s, 3H, minor isomer), 2.10 (s, 3H, major isomer), 2.08 (s, 3H, major isomer), 2.07 (s, 3H, minor isomer), 1.98 (s, 3H, minor isomer);  $^{13}\text{C}$  NMR (125 MHz,  $\text{CDCl}_3$ , 2:1 mixture of anomers)  $\delta$  170.7, 170.6, 170.2, 138.7–127.7 (ArC), 102.4, 101.1, 99.5, 98.2, 98.1, 94.9, 84.5, 82.4, 82.0, 79.9, 79.5, 76.8, 75.8, 75.2, 75.1, 75.0, 73.5, 73.4, 70.9, 70.7, 66.6, 66.3, 65.8, 65.7, 65.2, 62.5, 62.4, 62.2, 57.4, 21.1, 20.8; HRMS calcd for  $\text{C}_{38}\text{H}_{47}\text{INO}_{11}$   $[\text{M} + \text{NH}_4]^+$  820.2194, found 820.2193.

**(*E*)-methyl 3-((5*S*,6*R*)-5-acetoxy-6-(acetoxymethyl)-2-methoxy-5,6-dihydro-2*H*-pyran-3-yl)acrylate (**30**)**

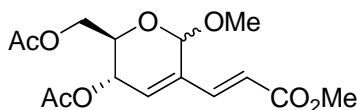

To a stirred solution of **24** (50 mg, 0.135 mmol) in DMF (2.0 mL), were added  $\text{Pd}(\text{OAc})_2$  (3.0 mg, 0.013 mmol),  $\text{PPh}_3$  (5.4 mg, 0.027 mmol), methyl acrylate (0.024 mL, 0.270 mmol) followed by  $\text{K}_2\text{CO}_3$  (37.2 mg, 0.270 mmol) under  $\text{N}_2$  atmosphere. The reaction mixture was stirred for 0.5 h at 80  $^\circ\text{C}$ . After confirmation of the completion of the reaction by TLC, the mixture diluted with water and extracted from diethyl ether ( $2 \times 10$  mL), and the combined organic extracts were washed with water ( $1 \times 10$  mL), brine ( $1 \times 10$  mL), and then dried over  $\text{Na}_2\text{SO}_4$ . Concentration in *vacuo* gave a crude residue which was purified by silica gel column chromatography (10–15% of EtOAc/hexane) to obtain **30** (34 mg, 79%) as a colorless oil.  $R_f$  0.20 (hexane:ethyl acetate, 3:1); IR (neat)  $\nu_{\text{max}}$  2953, 1745, 1647, 1623, 1436, 1371, 1288, 1234, 1178, 1078  $\text{cm}^{-1}$ ;  $^1\text{H}$  NMR (500 MHz,  $\text{CDCl}_3$ , 4:1 mixture of anomers)  $\delta$  7.15–7.12 (m, 1H, both anomers), 6.21 (d,  $J = 4.3$  Hz, 1H, minor anomer), 6.11 (d,  $J = 1.8$  Hz, 1H, major anomer), 6.05

(d,  $J = 16.5$  Hz, 1H, minor anomer), 5.91 (d,  $J = 16.4$  Hz, 1H, major isomer), 5.42 (d,  $J = 7.9$  Hz, 1H, major anomer), 5.25 (t,  $J = 4.2$  Hz, 1H, minor anomer), 5.18 (s, 1H, minor anomer), 5.05 (s, 1H, major anomer), 4.26–4.19 (m, 3H, major anomer) 4.14–4.11 (m, 3H, minor anomer), 3.74 (s, 3H, both anomers), 3.50 (s, 3H, major anomer), 3.47 (s, 3H, minor anomer), 2.08 (s, 6H, major anomer), 2.07 (s, 6H, minor anomer);  $^{13}\text{C}$  NMR (125 MHz,  $\text{CDCl}_3$ , 4:1 mixture of anomers)  $\delta$  170.7, 170.2, 166.9, 140.9, 136.6, 136.0, 134.1, 130.9, 121.0, 120.0, 95.6, 72.6, 66.9, 65.6, 64.6, 63.2, 62.7, 55.9, 55.0, 51.8, 20.9, 20.8; HRMS calcd for  $\text{C}_{15}\text{H}_{20}\text{NaO}_8$   $[\text{M} + \text{Na}]^+$  351.1056, found 351.1052.

**(*E*)-methyl 3-((2*S*,5*R*,6*R*)-5-acetoxy-6-(acetoxymethyl)-2-methoxy-5,6-dihydro-2*H*-pyran-3-yl)acrylate (**31**)**

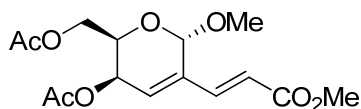

To a stirred solution of **27** (50 mg, 0.135 mmol) in DMF (2.0 mL), were added  $\text{Pd}(\text{OAc})_2$  (3.0 mg, 0.013 mmol),  $\text{PPh}_3$  (5.4 mg, 0.027 mmol), methyl acrylate (0.024 mL, 0.270 mmol) followed by  $\text{K}_2\text{CO}_3$  (37.2 mg, 0.270 mmol) under  $\text{N}_2$  atmosphere. The reaction mixture was stirred for 0.5 h at 80 °C. After confirmation of the completion of the reaction by TLC, the mixture diluted with water and extracted from diethyl ether ( $2 \times 10$  mL), and the combined organic extracts were washed with water ( $1 \times 10$  mL), brine ( $1 \times 10$  mL), and then dried over  $\text{Na}_2\text{SO}_4$ . Concentration in *vacuo* gave a crude residue which was purified by silica gel column chromatography (10–15% of EtOAc/hexane) to obtain **31** (36 mg, 81%) as a colorless oil.  $R_f$  0.40 (hexane:ethyl acetate, 3:1);  $[\alpha]_D^{28} = -150.0$  ( $c$  0.55,  $\text{CH}_2\text{Cl}_2$ ); IR (neat)  $\nu_{\text{max}}$  2953, 2832, 1741, 1647, 1621, 1436, 1370, 1227, 1173, 1043  $\text{cm}^{-1}$ ;  $^1\text{H}$  NMR (500 MHz,  $\text{CDCl}_3$ )  $\delta$  7.18 (d,  $J$

= 15.9 Hz, 1H), 6.28 (d,  $J$  = 5.5 Hz, 1H), 5.98 (d,  $J$  = 15.9 Hz, 1H), 5.16 (d,  $J$  = 5.4 Hz, 1H), 5.10 (s, 1H), 4.34–4.24 (m, 3H), 3.76 (s, 3H), 3.50 (s, 3H), 2.08 (s, 3H), 2.07 (s, 3H);  $^{13}\text{C}$  NMR (125 MHz,  $\text{CDCl}_3$ )  $\delta$  170.6, 170.3, 166.8, 141.2, 137.6, 129.8, 120.6, 95.2, 66.4, 63.4, 62.6, 55.6, 51.9, 20.8; HRMS calcd for  $\text{C}_{15}\text{H}_{20}\text{NaO}_8$   $[\text{M} + \text{Na}]^+$  351.1056, found 351.1050.

**((5*S*,6*R*)-5-acetoxy-3-methylene-3,5,6,7a-tetrahydro-2*H*-furo[2,3-*b*]pyran-6-yl)methyl acetate (**32**)**

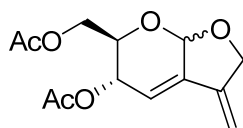

To a stirred solution of **25** (50 mg, 0.126 mmol) in DMF (2.0 mL), were added  $\text{Pd}(\text{OAc})_2$  (2.8 mg, 0.012 mmol),  $\text{PPh}_3$  (6.6 mg, 0.025 mmol) followed by  $\text{K}_2\text{CO}_3$  (34.8 mg, 0.252 mmol) under  $\text{N}_2$  atmosphere. The reaction mixture was stirred for 2 h at 80 °C. After confirmation of the completion of the reaction by TLC, the mixture diluted with water and extracted from diethyl ether ( $2 \times 10$  mL), and the combined organic extracts were washed with water ( $1 \times 10$  mL), brine ( $1 \times 10$  mL), and then dried over  $\text{Na}_2\text{SO}_4$ . Concentration in *vacuo* gave a crude residue which was purified by silica gel column chromatography (5–10% of EtOAc/hexane) to obtain **32** (26 mg, 78%) as a colorless oil.  $R_f$  0.30 (hexane:ethyl acetate, 3:1); IR (neat)  $\nu_{\text{max}}$  2920, 2852, 1740, 1371, 1230, 1153, 1034  $\text{cm}^{-1}$ ;  $^1\text{H}$  NMR (500 MHz,  $\text{CDCl}_3$ , 5:1 mixture of diastereomers)  $\delta$  6.11 (d,  $J$  = 4.0 Hz, 1H, minor isomer), 6.03 (s, 1H, major isomer), 5.47–5.42 (m, 2H, both isomers), 5.05 (s, 1H, minor isomer), 4.99 (s, 1H, major isomer), 4.64–4.58 (m, 1H, both isomers), 4.47–4.35 (m, 1H, both isomers), 4.34 (dd,  $J$  = 5.7, 12.0 Hz, 1H, major isomer), 4.27–4.21 (m, 3H, 1H major isomer, 2H minor isomer), 4.03–4.00 (m, 1H, minor isomer), 3.96–3.93 (m, 1H, major isomer), 2.11 (s, 3H, major isomer), 2.08 (m, 9H, 3H major isomer, 6H minor isomer);  $^{13}\text{C}$

NMR (125 MHz, CDCl<sub>3</sub>, 5:1 mixture of diastereomers)  $\delta$  170.8, 170.3, 140.0, 138.3, 120.1, 106.5, 105.4, 100.5, 97.8, 72.0, 70.6, 69.7, 66.4, 65.8, 63.5, 62.4, 21.0, 20.9; HRMS calcd for C<sub>13</sub>H<sub>16</sub>NaO<sub>6</sub> [M + Na]<sup>+</sup> 291.0845, found 291.0841.

**(E)-methyl 3-((5S,6R)-5-acetoxy-6-(acetoxymethyl)-2-(((2R,3R,4S,5R,6S)-3,4,5-tris(benzyloxy)-6-methoxytetrahydro-2H-pyran-2-yl)methoxy)-5,6-dihydro-2H-pyran-3-yl)acrylate (33)**

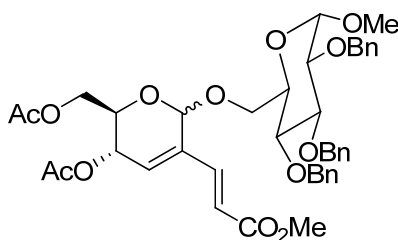

To a stirred solution of **26** (100 mg, 0.124 mmol) in DMF (3.0 mL), were added Pd(OAc)<sub>2</sub> (2.7 mg, 0.012 mmol), PPh<sub>3</sub> (6.5 mg, 0.024 mmol), methyl acrylate (0.022 mL, 0.249 mmol) followed by K<sub>2</sub>CO<sub>3</sub> (34.3 mg, 0.249 mmol) under N<sub>2</sub> atmosphere. The reaction mixture was stirred for 1 h at 80 °C. After confirmation of the completion of the reaction by TLC, the mixture diluted with water and extracted from diethyl ether (2 × 20 mL), and the combined organic extracts were washed with water (1 × 10 mL), brine (1 × 10 mL), and then dried over Na<sub>2</sub>SO<sub>4</sub>. Concentration in *vacuo* gave a crude residue which was purified by silica gel column chromatography (20–25% of EtOAc/hexane) to obtain **33** (84 mg, 89%) as a colorless oil. *R<sub>f</sub>* 0.20 (hexane:ethyl acetate, 3:1); IR (neat)  $\nu_{\text{max}}$  2923, 2853, 1744, 1646, 1454, 1369, 1230, 1072, 1028 cm<sup>-1</sup>; <sup>1</sup>H NMR (400 MHz, CDCl<sub>3</sub>, 10:2 mixture of anomers)  $\delta$  7.38–7.24 (m, 15H, both isomers), 7.14–7.13 (m, 1H, minor isomer), 7.13 (d, *J* = 16.0 Hz, 1H, major isomer), 6.36 (d, *J* = 16.0 Hz, 1H, major isomer), 6.27 (d, *J* = 16.0 Hz, 1H, minor isomer), 6.20 (d, *J* = 4.12 Hz, 1H,



minor isomer), 6.03 (m, 1H, major isomer), 5.42 (d,  $J = 7.2$  Hz, 1H, major isomer), 5.24 (s, 1H, both isomers), 4.99–4.98 (m, 1H, minor isomer), 4.94 (d,  $J = 11.0$  Hz, 1H, major isomer), 4.88 (d,  $J = 11.4$  Hz, 1H, minor isomer), 4.87 (d,  $J = 11.0$  Hz, 1H, major isomer), 4.84–4.76 (m, 4H, both isomers), 4.70 (d,  $J = 11.4$  Hz, 1H, major isomer), 4.67–4.64 (m, 1H, minor isomer), 4.61 (d,  $J = 11.4$  Hz, 1H, major isomer), 4.58–4.56 (m, 1H, minor isomer), 4.22 (d,  $J = 5.4$  Hz, 1H, minor isomer), 4.19 (d,  $J = 5.0$  Hz, 1H, major isomer), 4.15 (d,  $J = 2.2$  Hz, 1H, major isomer), 4.13 (d,  $J = 2.2$  Hz, 1H, minor isomer), 4.09–3.95 (m, 3H, both isomers), 3.81–3.78 (m, 1H, both isomers), 3.75–3.73 (m, 1H, both isomers), 3.68 (s, 3H, major isomer), 3.64 (s, 3H, minor isomer), 3.62–3.51 (m, 2H, both isomers), 3.39 (s, 3H, major isomer), 3.36–3.35 (m, 1H, both isomers), 3.31 (s, 3H, minor isomer), 2.10 (s, 3H, major isomer), 2.08 (s, 3H, minor isomer), 2.02 (s, 3H, major isomer), 1.99 (s, 3H, minor isomer),  $^{13}\text{C}$  NMR (100 MHz,  $\text{CDCl}_3$ , 10:2 mixture of anomers)  $\delta$  170.7, 170.2, 167.1, 141.0–120.9 (ArC), 98.0, 97.7, 95.5, 95.1, 82.1, 81.9, 80.8, 80.1, 80.0, 78.1, 75.8, 75.2, 74.9, 73.4, 73.3, 72.6, 70.7, 70.2, 69.6, 68.0, 67.0, 66.9, 65.6, 64.7, 63.3, 62.7, 56.3, 56.2, 51.7, 21.0, 20.8; HRMS calcd for  $\text{C}_{42}\text{H}_{52}\text{NO}_{13}$   $[\text{M} + \text{NH}_4]^+$  778.3439, found 778.3439.

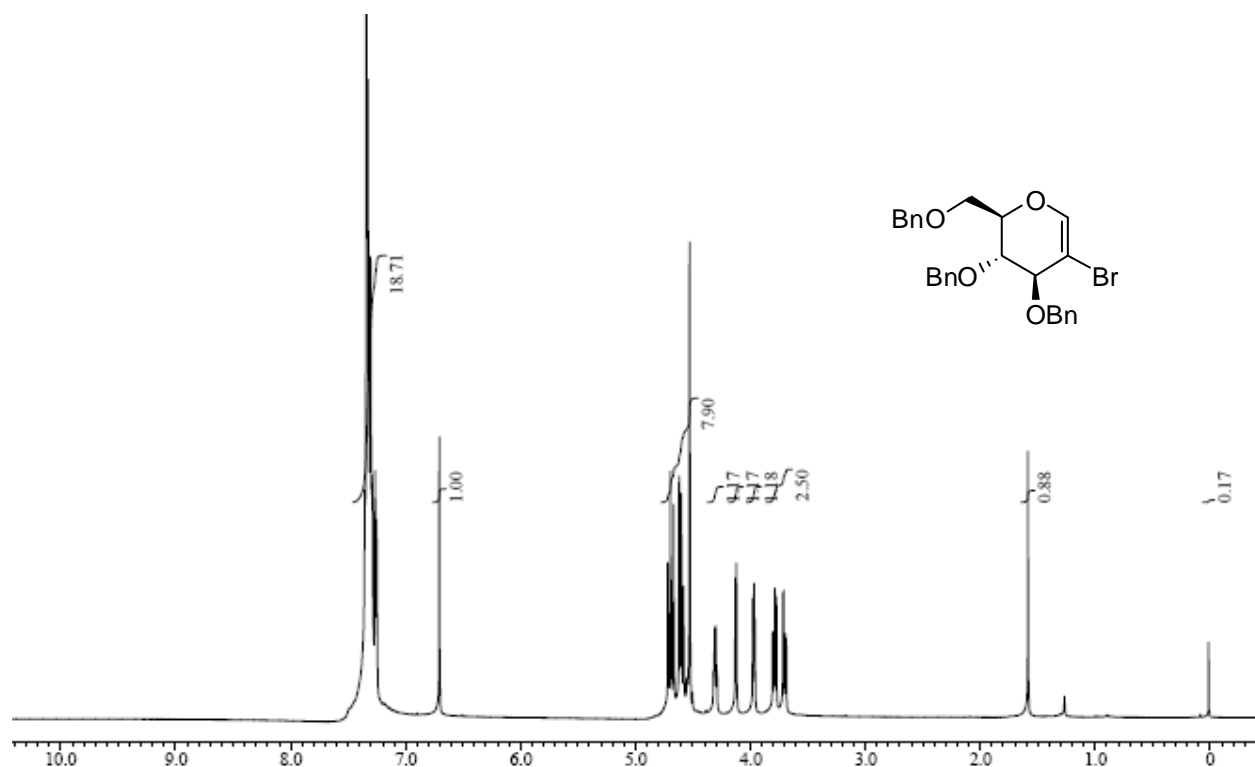

**Figure 1.1:**  $^1\text{H}$  NMR (500 MHz,  $\text{CDCl}_3$ ) Spectrum of Compound **2b**

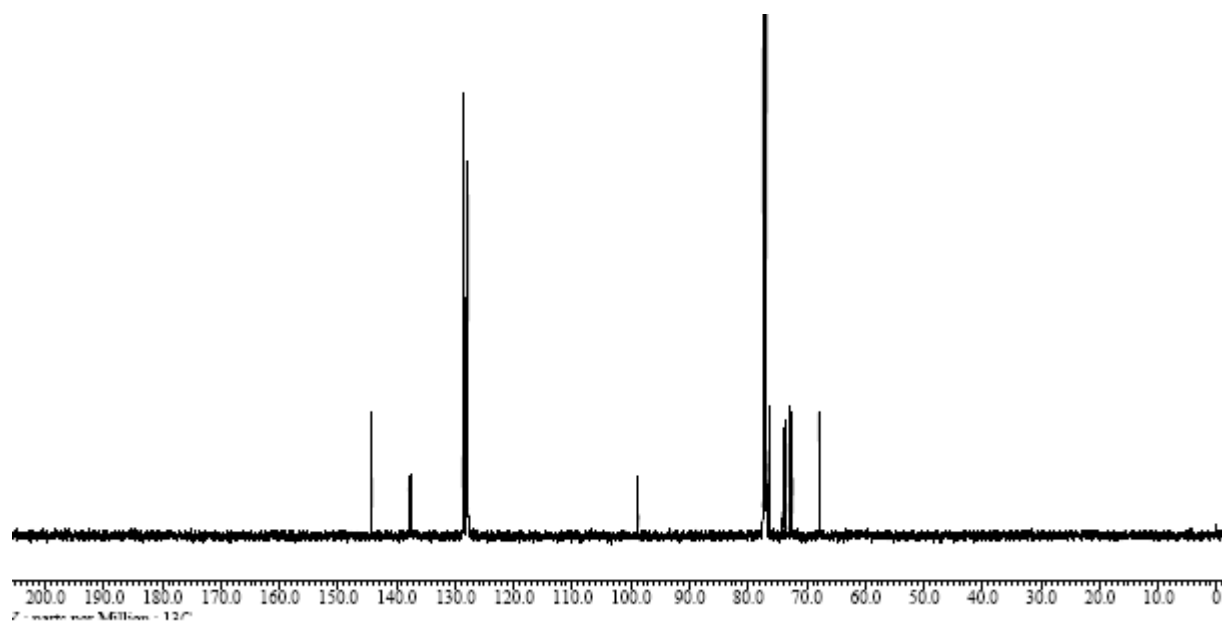

**Figure 1.2:**  $^{13}\text{C}$  NMR (125 MHz,  $\text{CDCl}_3$ ) Spectrum of Compound **2b**

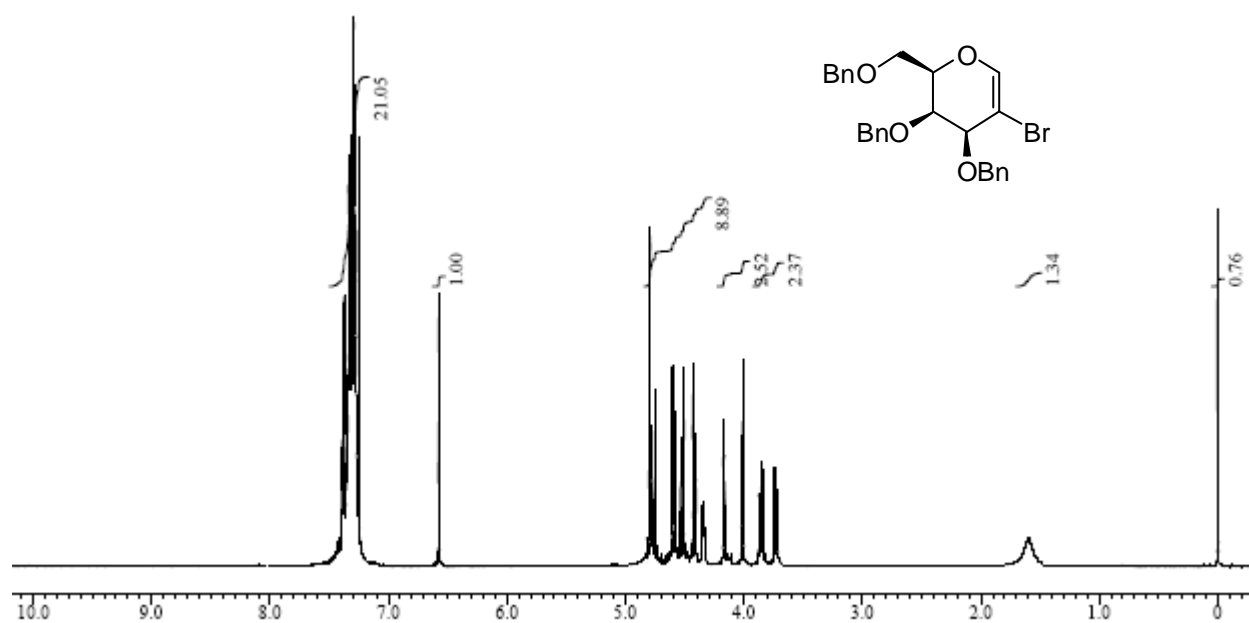

**Figure 2.1:**  $^1\text{H}$  NMR (500 MHz,  $\text{CDCl}_3$ ) Spectrum of Compound **4b**

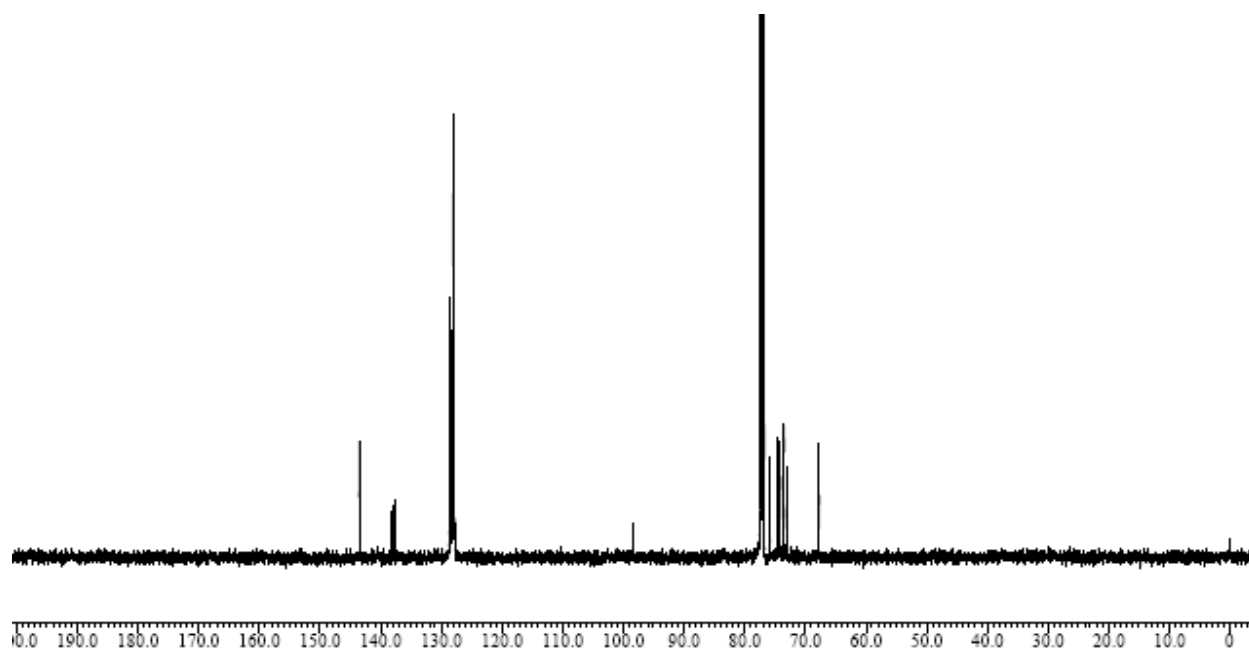

**Figure 2.2:**  $^{13}\text{C}$  NMR (125 MHz,  $\text{CDCl}_3$ ) Spectrum of Compound **4b**

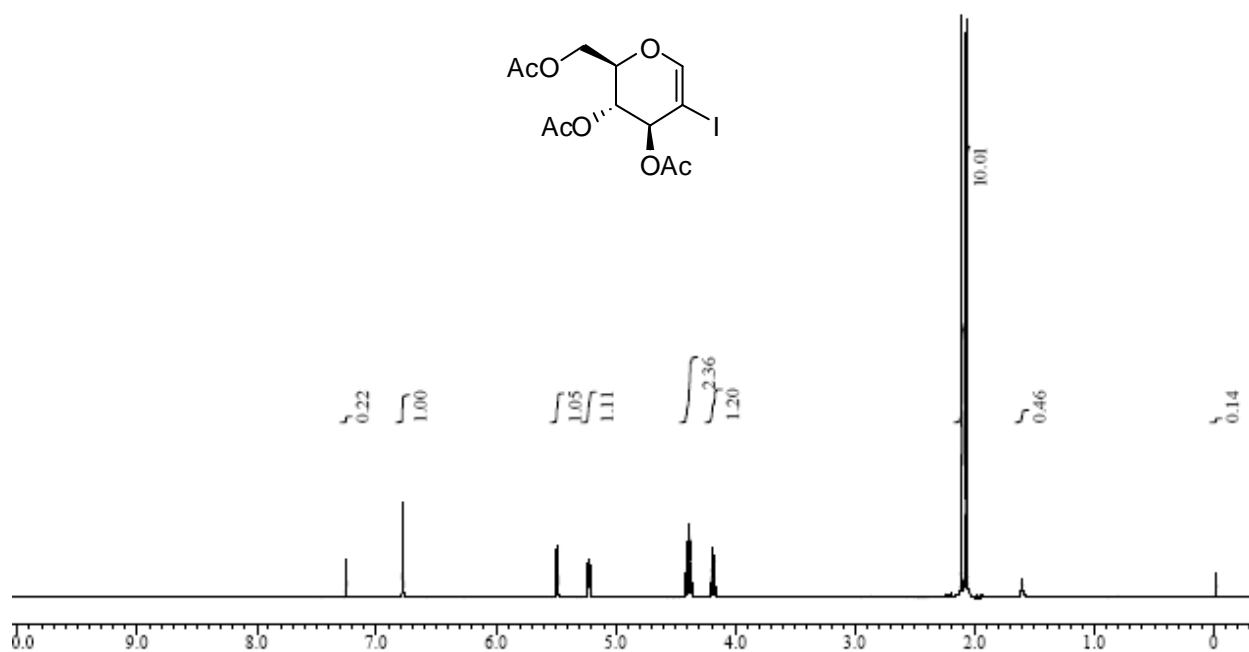

**Figure 3.1:** <sup>1</sup>H NMR (500 MHz, CDCl<sub>3</sub>) Spectrum of Compound **5a**

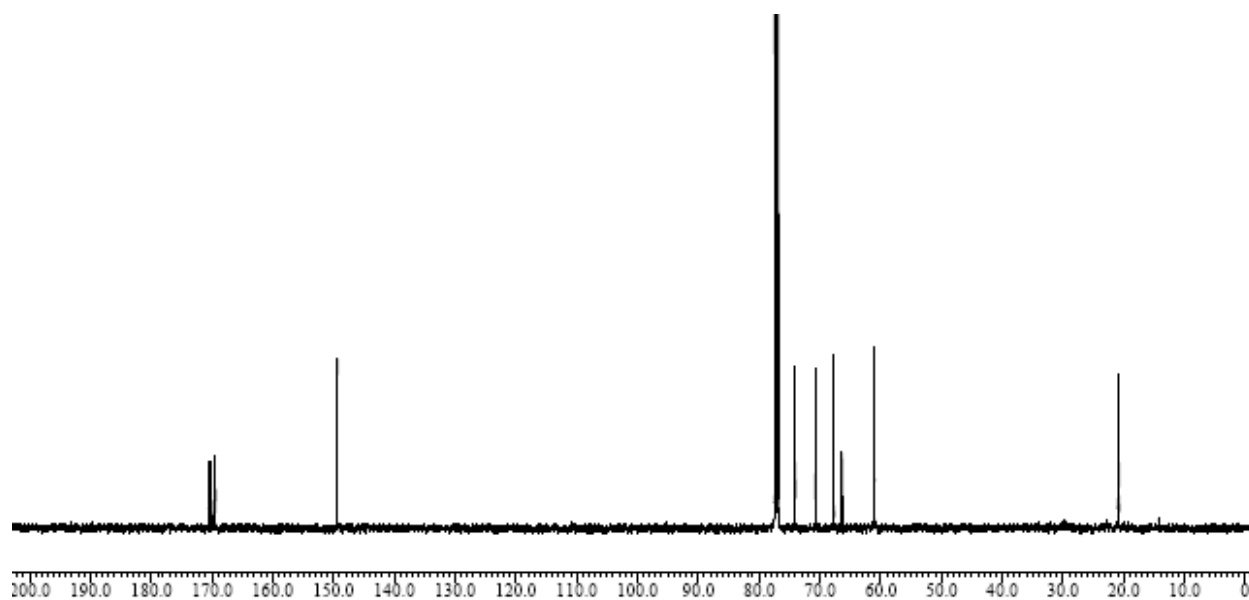

**Figure 3.2:** <sup>13</sup>C NMR (125 MHz, CDCl<sub>3</sub>) Spectrum of Compound **5a**

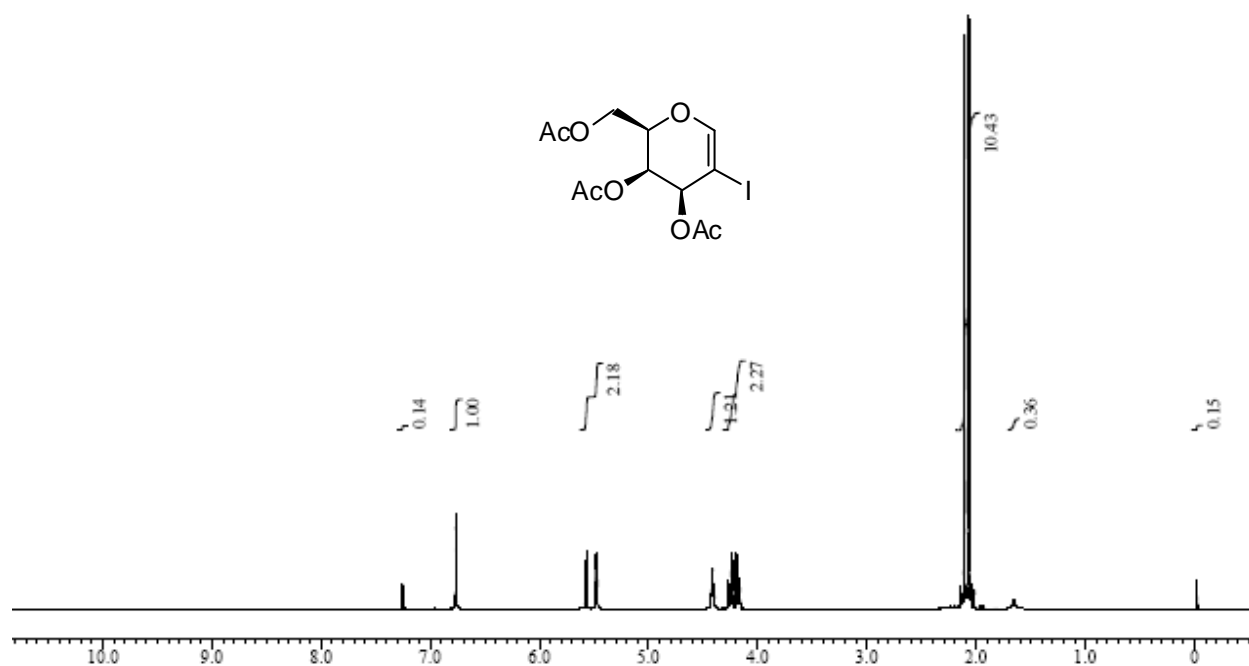

**Figure 4.1:** <sup>1</sup>H NMR (500 MHz, CDCl<sub>3</sub>) Spectrum of Compound 6a

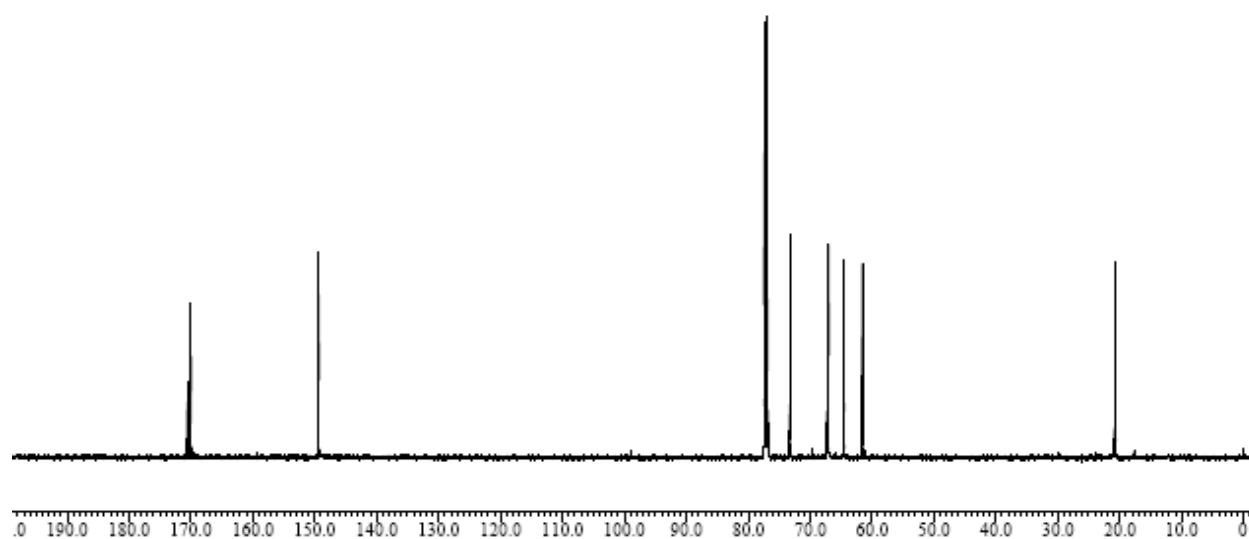

**Figure 4.2:** <sup>13</sup>C NMR (125 MHz, CDCl<sub>3</sub>) Spectrum of Compound 6a

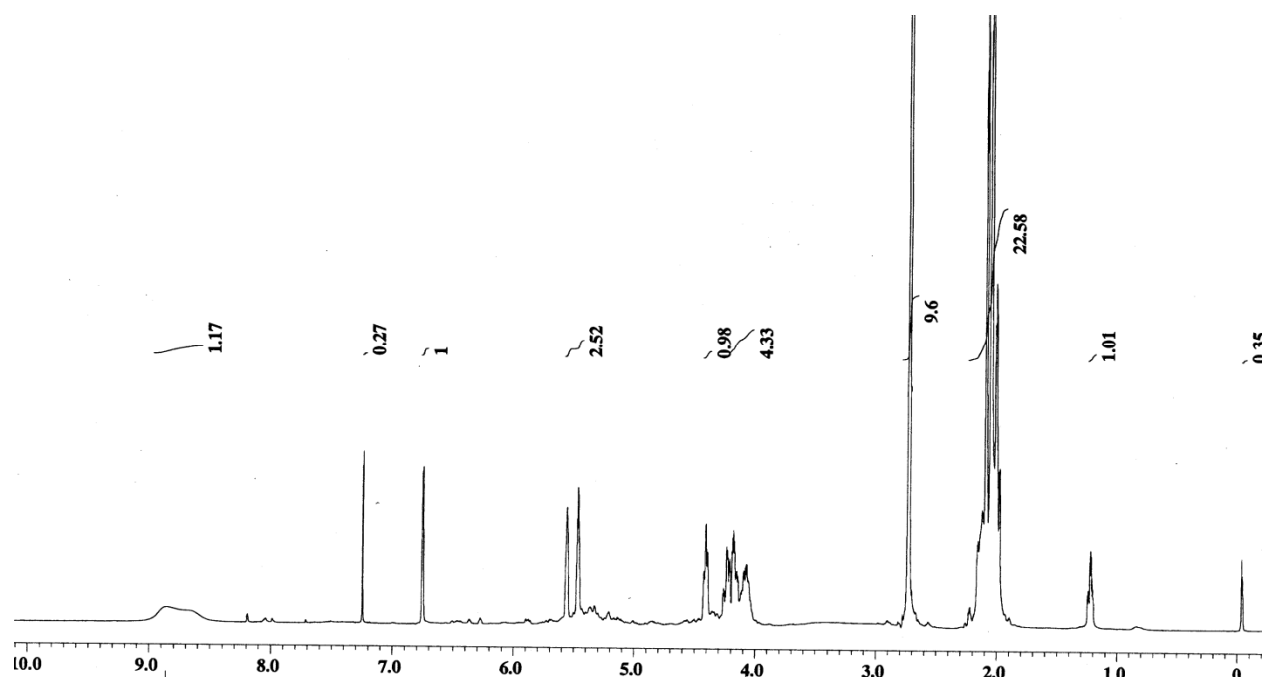

**Figure 4.3:** Crude  $^1\text{H}$  NMR (400 MHz,  $\text{CDCl}_3$ ) Spectrum of Compound 6a

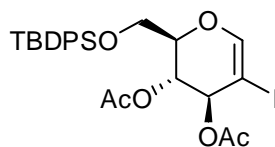

**Figure 5.2:**  $^{13}\text{C}$  NMR (125 MHz,  $\text{CDCl}_3$ ) Spectrum of Compound **7a**

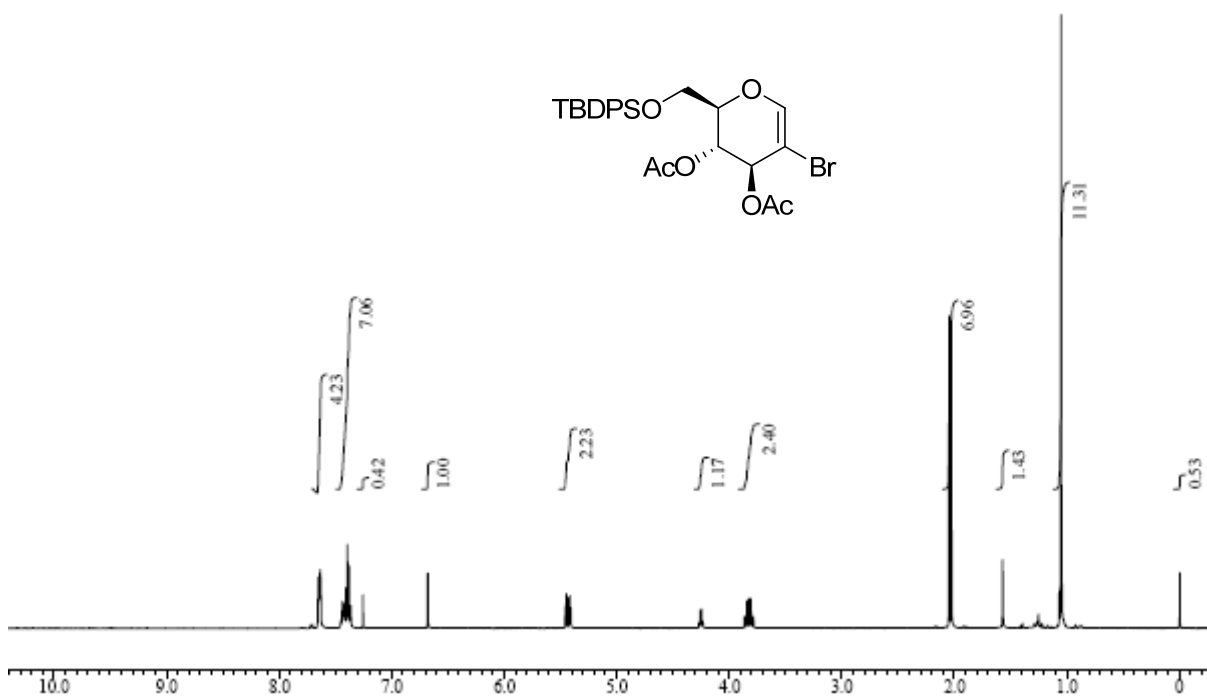

**Figure 6.1:** <sup>1</sup>H NMR (500 MHz, CDCl<sub>3</sub>) Spectrum of Compound **7b**

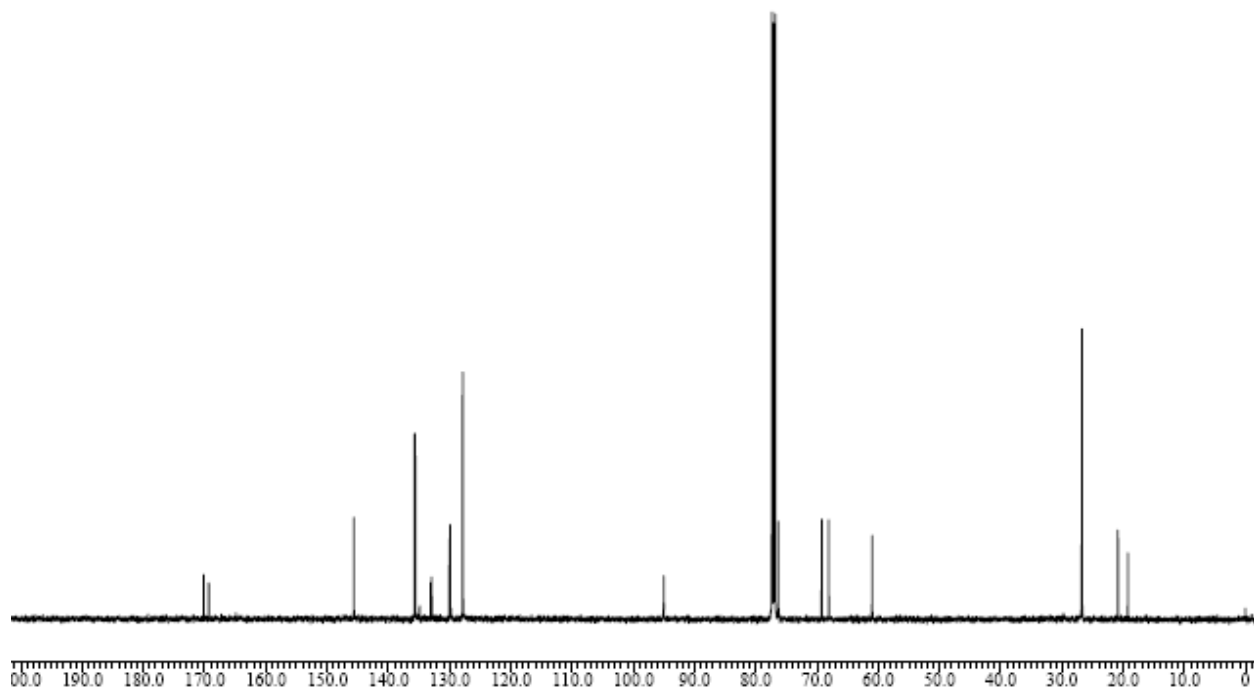

**Figure 6.2:** <sup>13</sup>C NMR (125 MHz, CDCl<sub>3</sub>) Spectrum of Compound **7b**



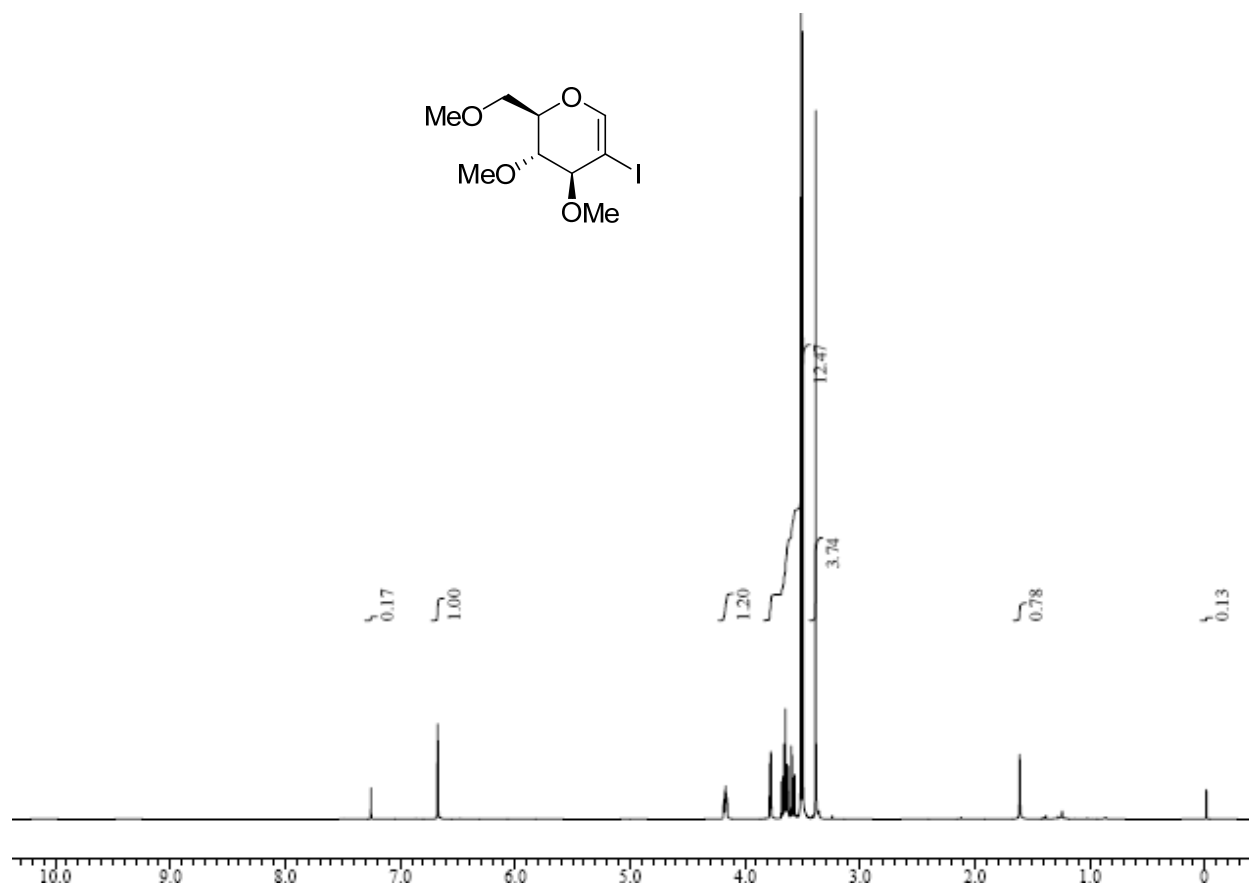

**Figure 7.1:** <sup>1</sup>H NMR (500 MHz, CDCl<sub>3</sub>) Spectrum of Compound 8a

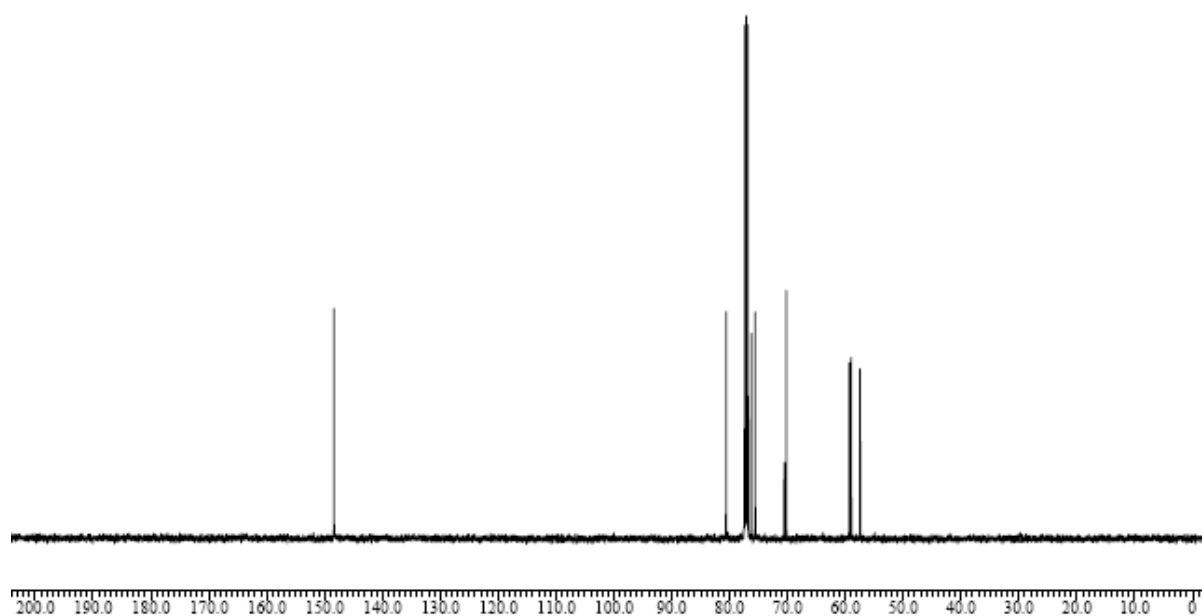

**Figure 7.2:** <sup>13</sup>C NMR (125 MHz, CDCl<sub>3</sub>) Spectrum of Compound 8a

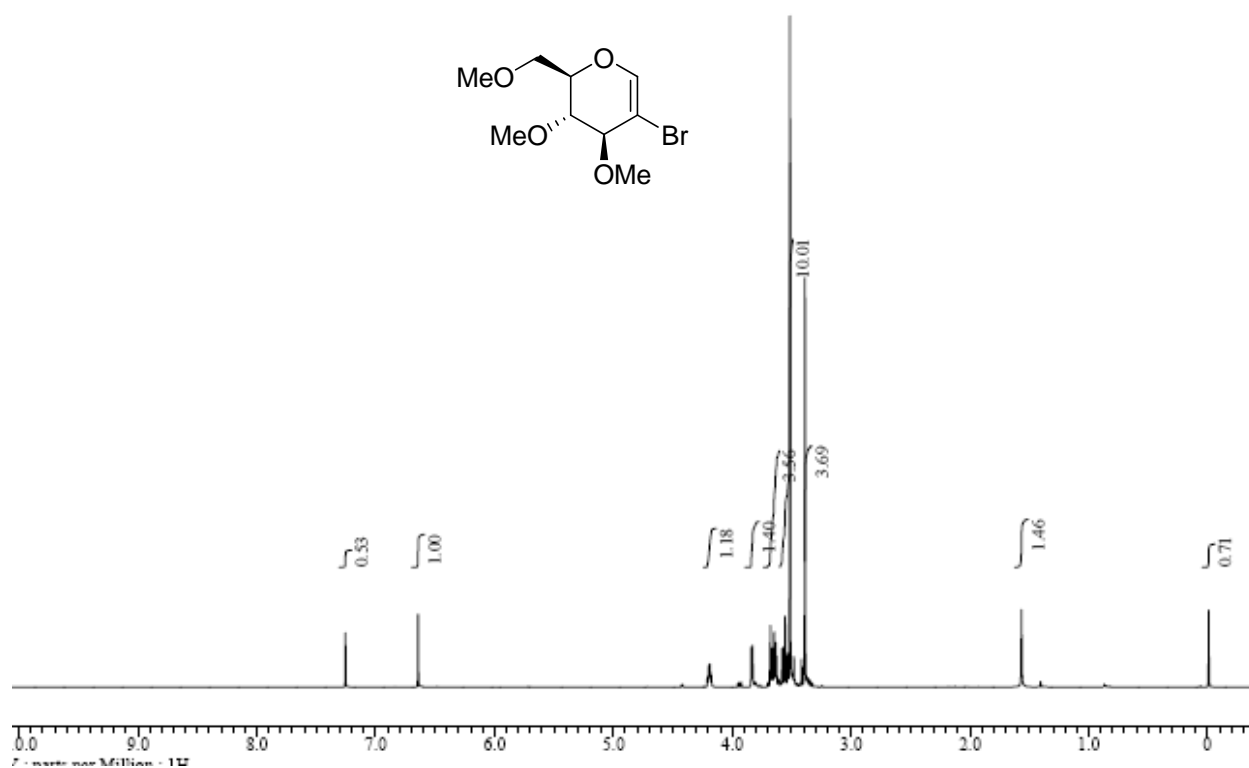

**Figure 8.1:** <sup>1</sup>H NMR (500 MHz, CDCl<sub>3</sub>) Spectrum of Compound 8b

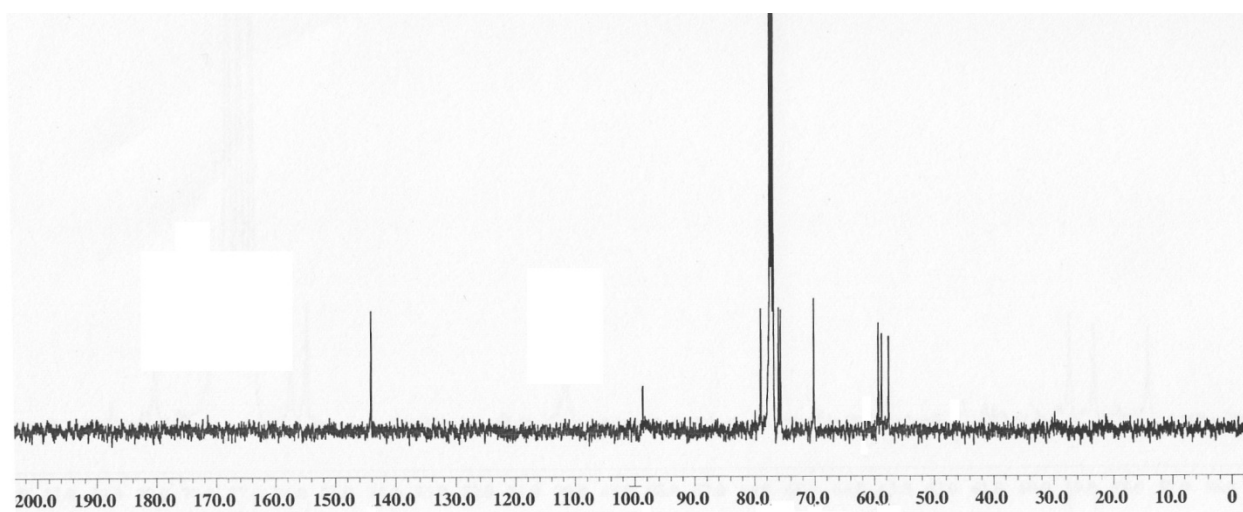

**Figure 8.2:** <sup>13</sup>C NMR (125 MHz, CDCl<sub>3</sub>) Spectrum of Compound 8b

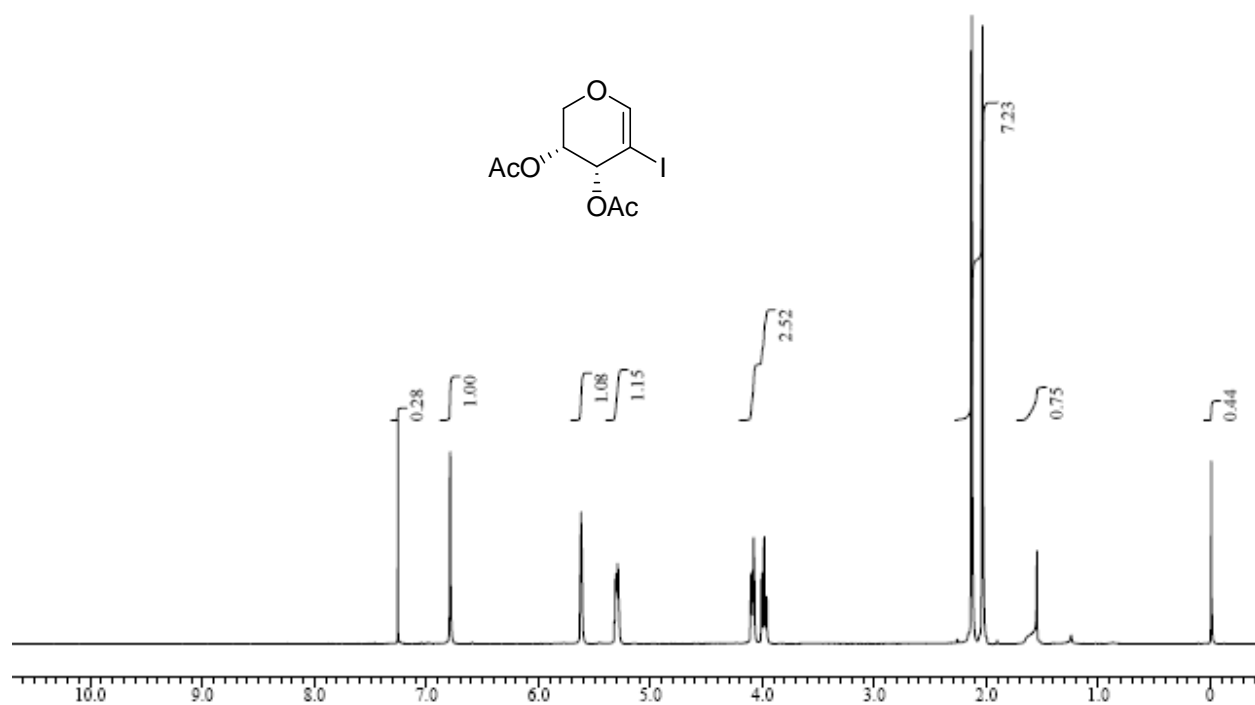

**Figure 9.1:** <sup>1</sup>H NMR (500 MHz, CDCl<sub>3</sub>) Spectrum of Compound 9a

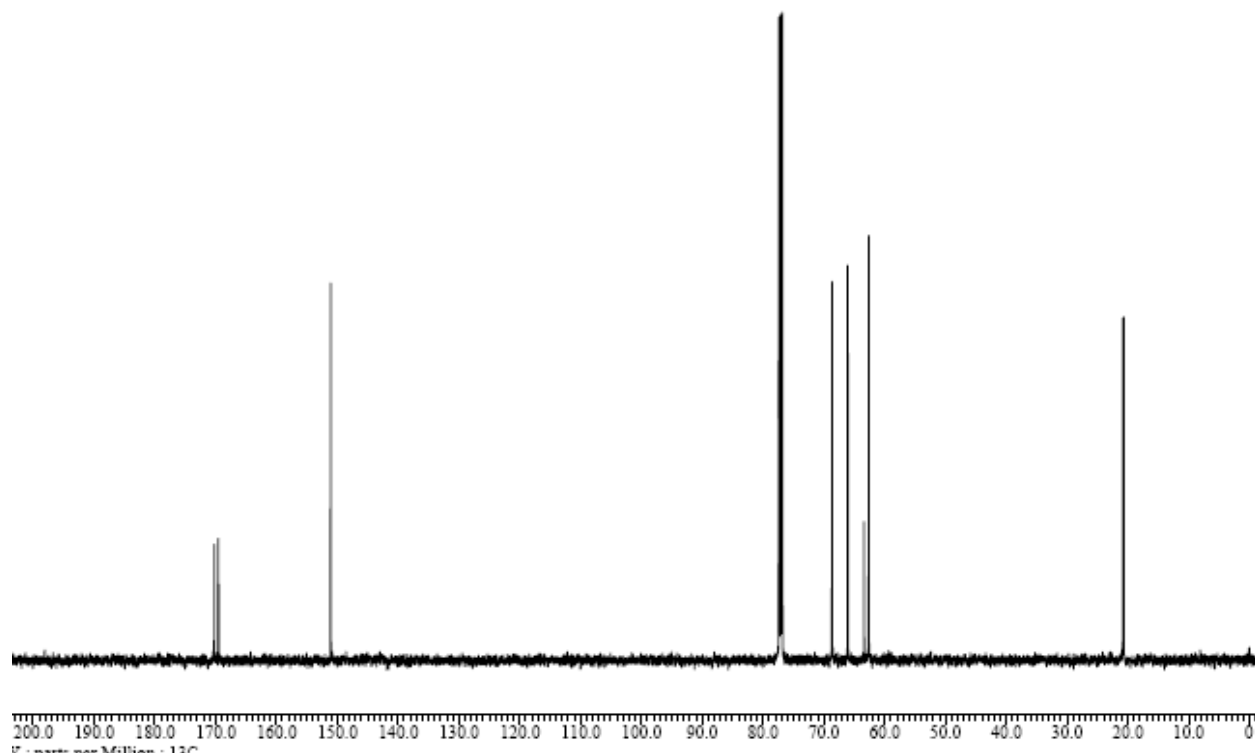

**Figure 9.2:** <sup>13</sup>C NMR (125 MHz, CDCl<sub>3</sub>) Spectrum of Compound 9a

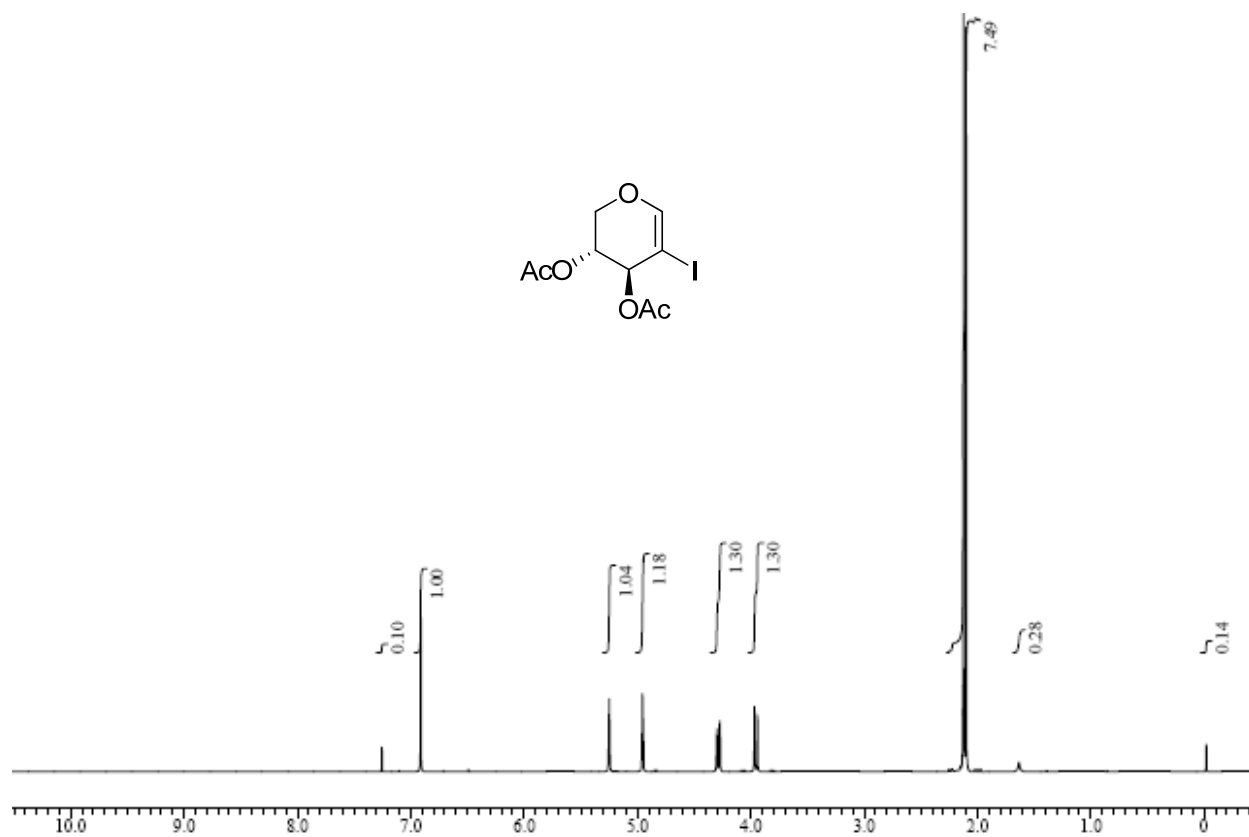

**Figure 10.1:** <sup>1</sup>H NMR (500 MHz, CDCl<sub>3</sub>) Spectrum of Compound 10a

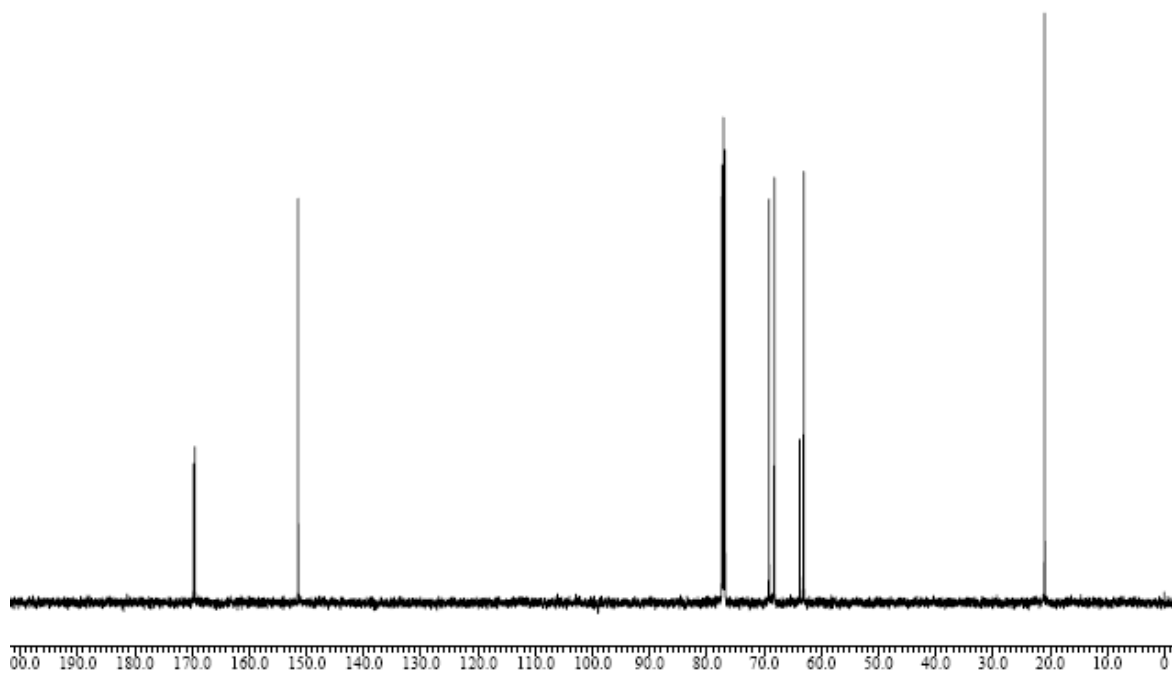

**Figure 10.2:** <sup>13</sup>C NMR (125 MHz, CDCl<sub>3</sub>) Spectrum of Compound 10a

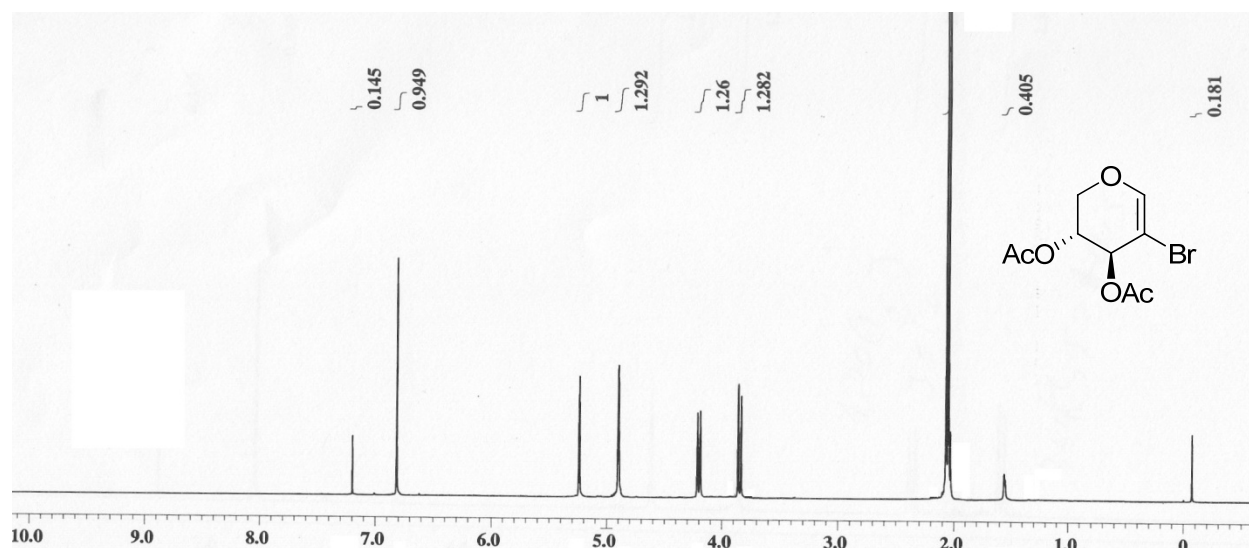

**Figure 11.1:**  $^1\text{H}$  NMR (500 MHz) ,  $\text{CDCl}_3$  Spectrum of Compound **10b**

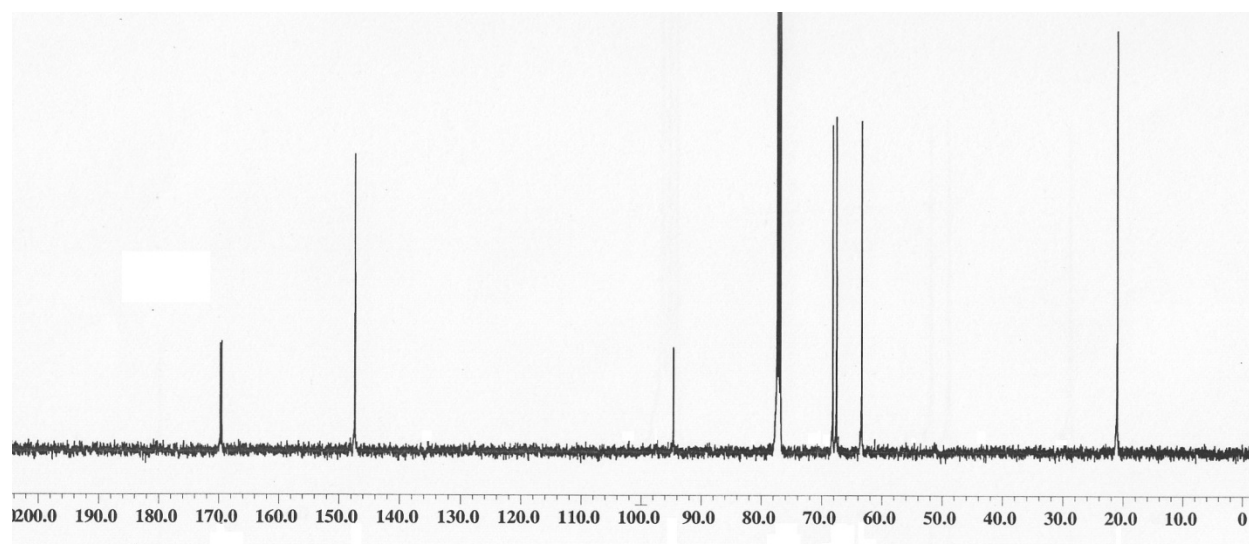

**Figure 11.2:**  $^{13}\text{C}$  NMR (125 MHz,  $\text{CDCl}_3$ ) Spectrum of Compound **10b**

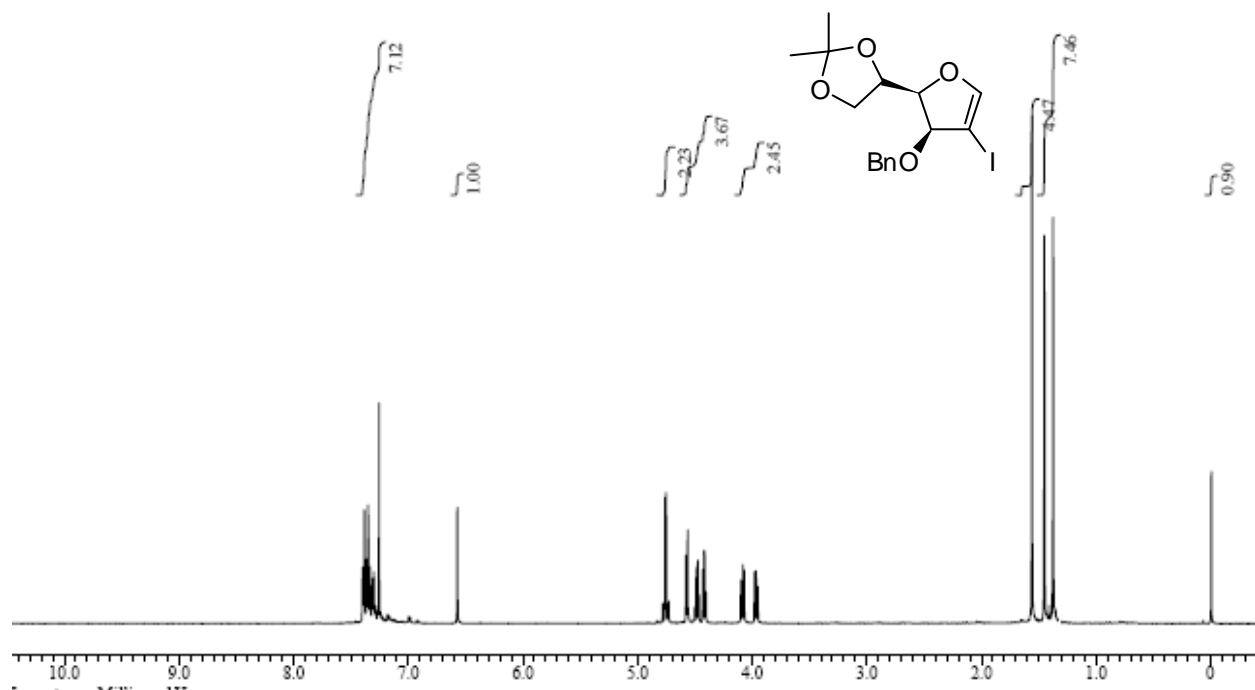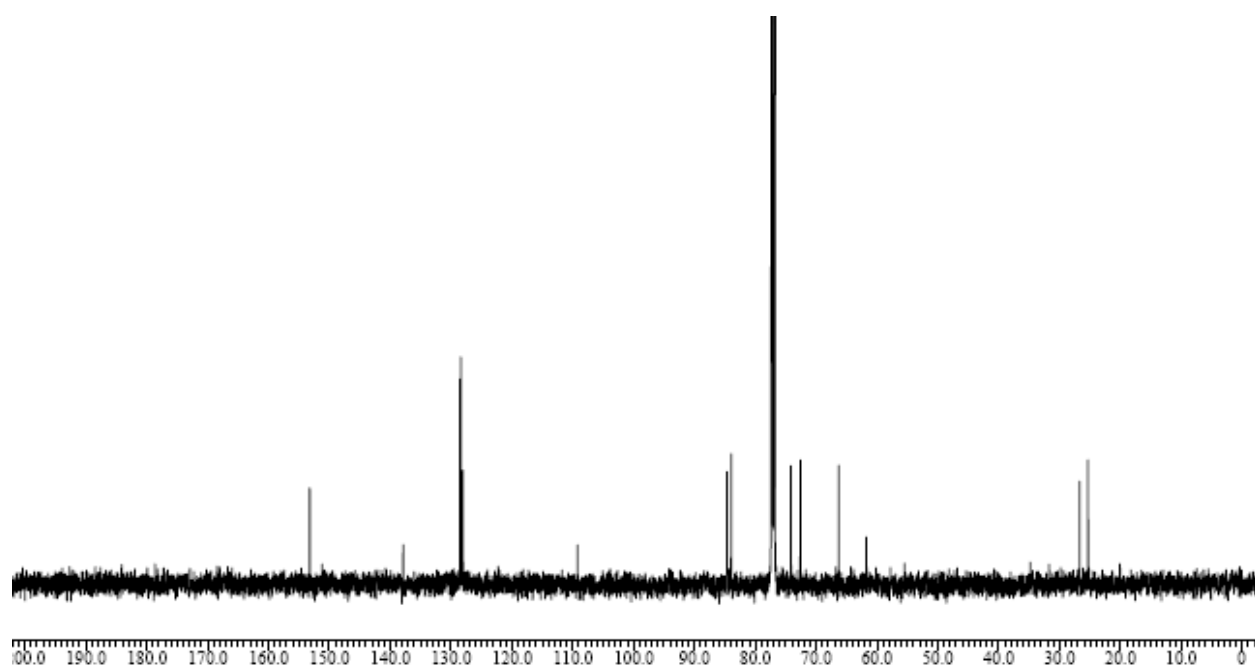

**Figure 12.2:** <sup>13</sup>C NMR (125 MHz, CDCl<sub>3</sub>) Spectrum of Compound 11a

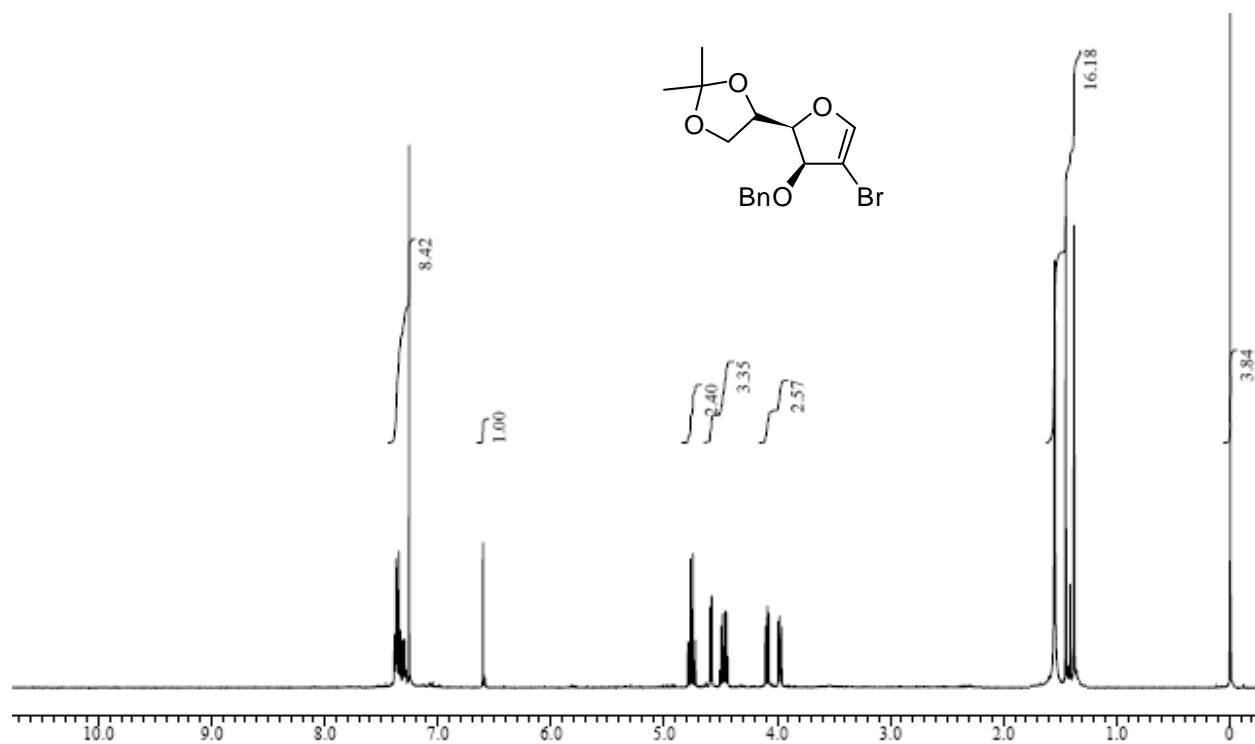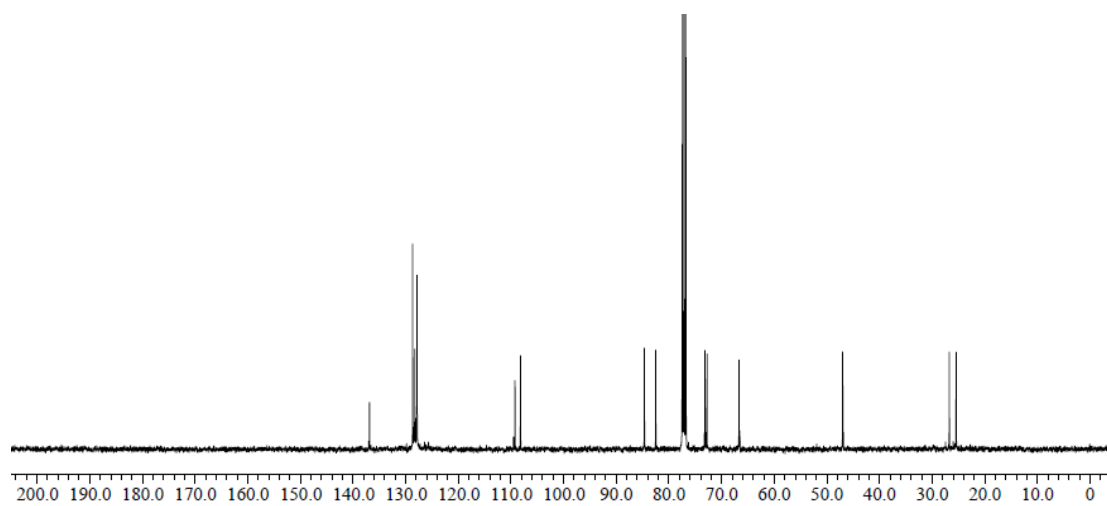

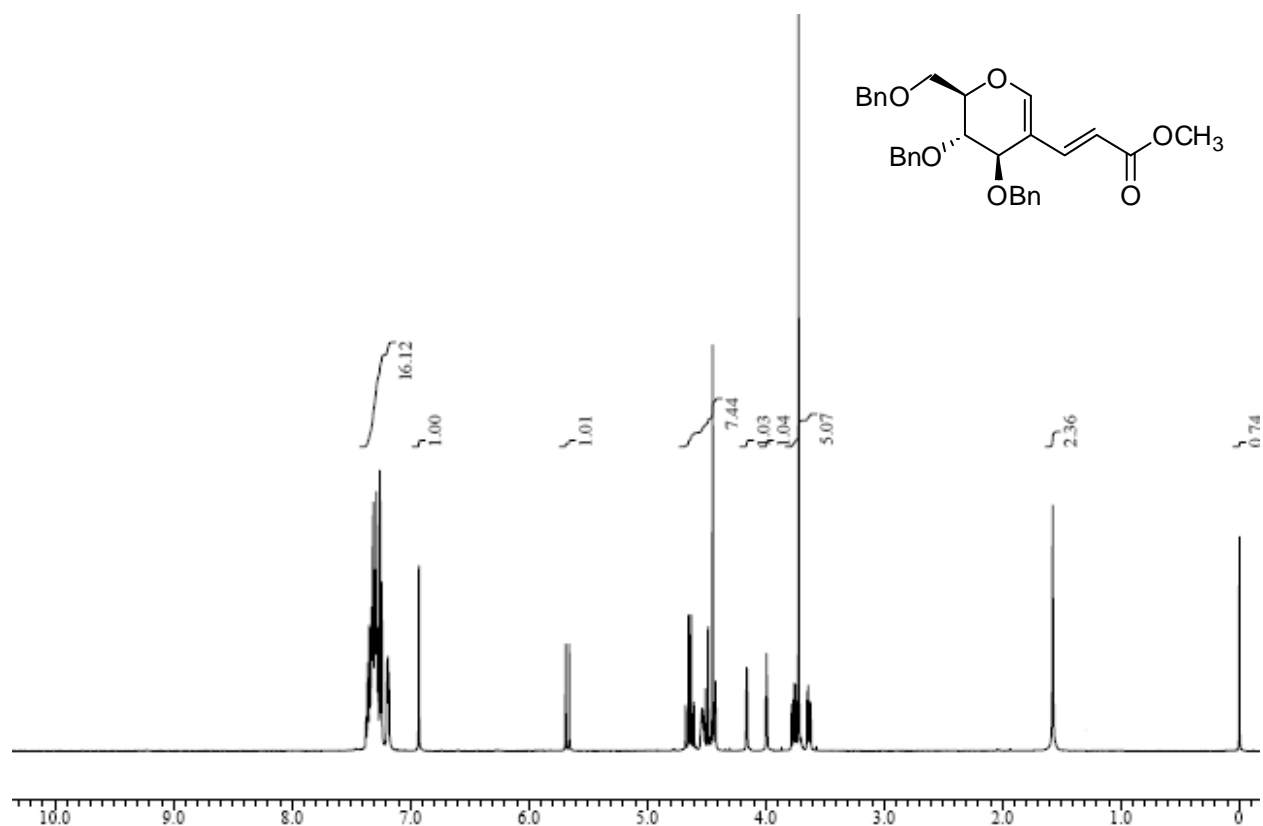

**Figure 14.1:** <sup>1</sup>H NMR (500 MHz, CDCl<sub>3</sub>) Spectrum of Compound 12

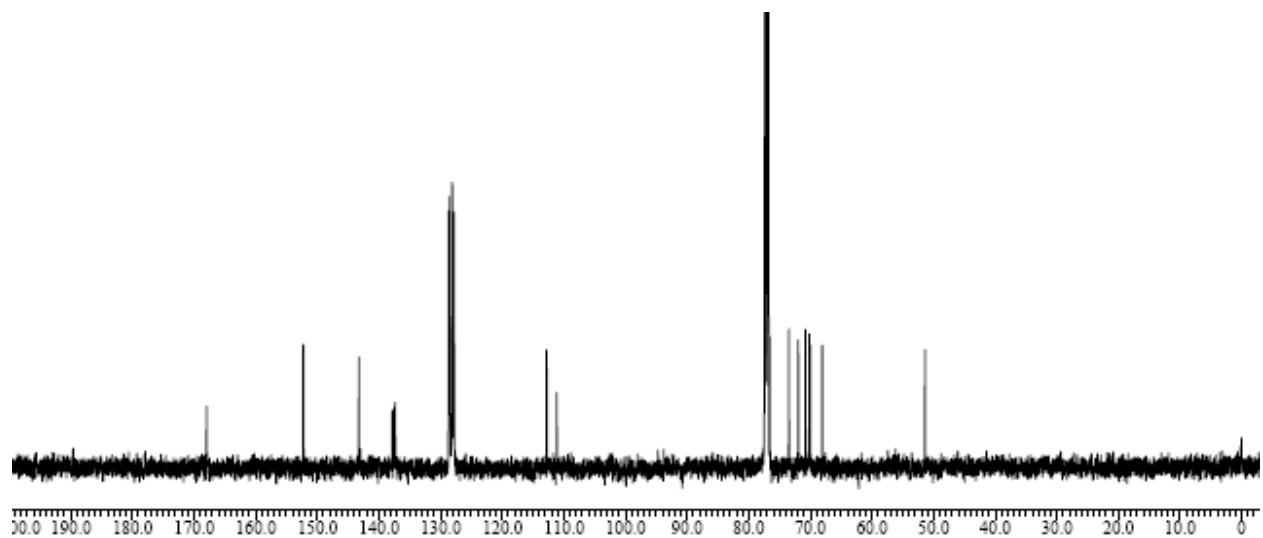

**Figure 14.2:** <sup>13</sup>C NMR (125 MHz, CDCl<sub>3</sub>) Spectrum of Compound 12



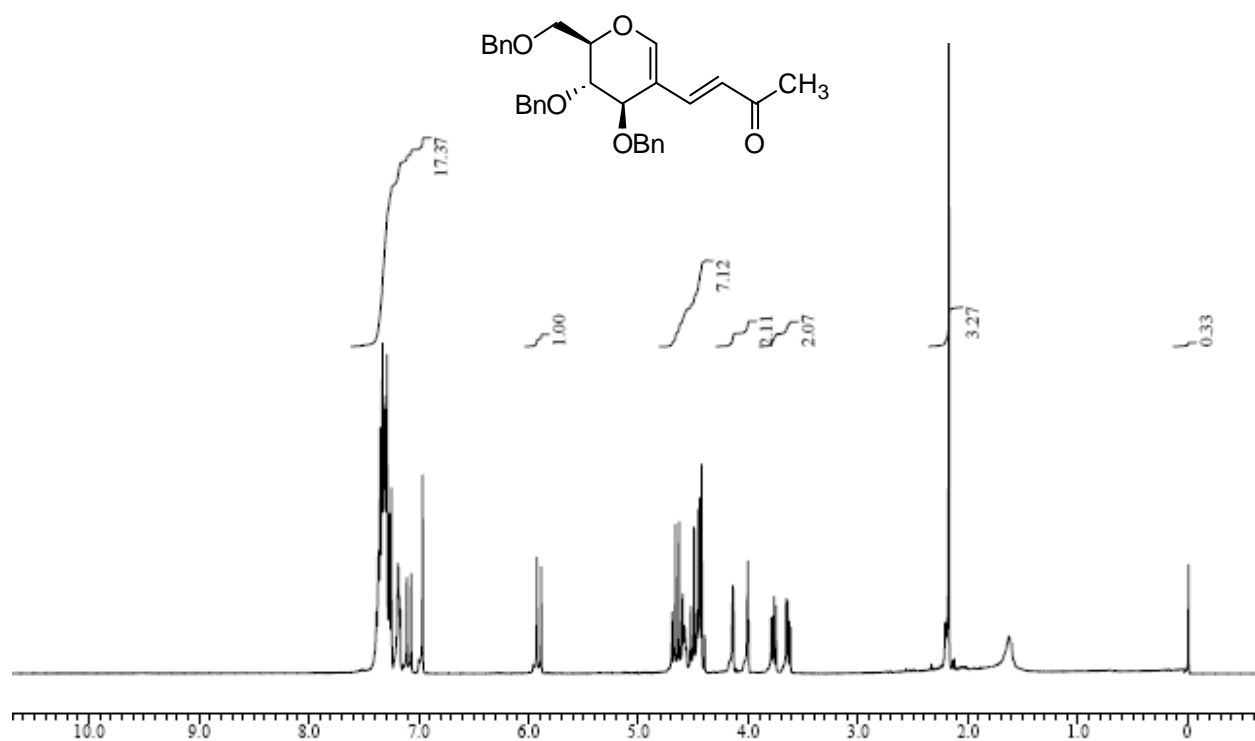

**Figure 15.1:** <sup>1</sup>H NMR (400 MHz, CDCl<sub>3</sub>) Spectrum of Compound 13

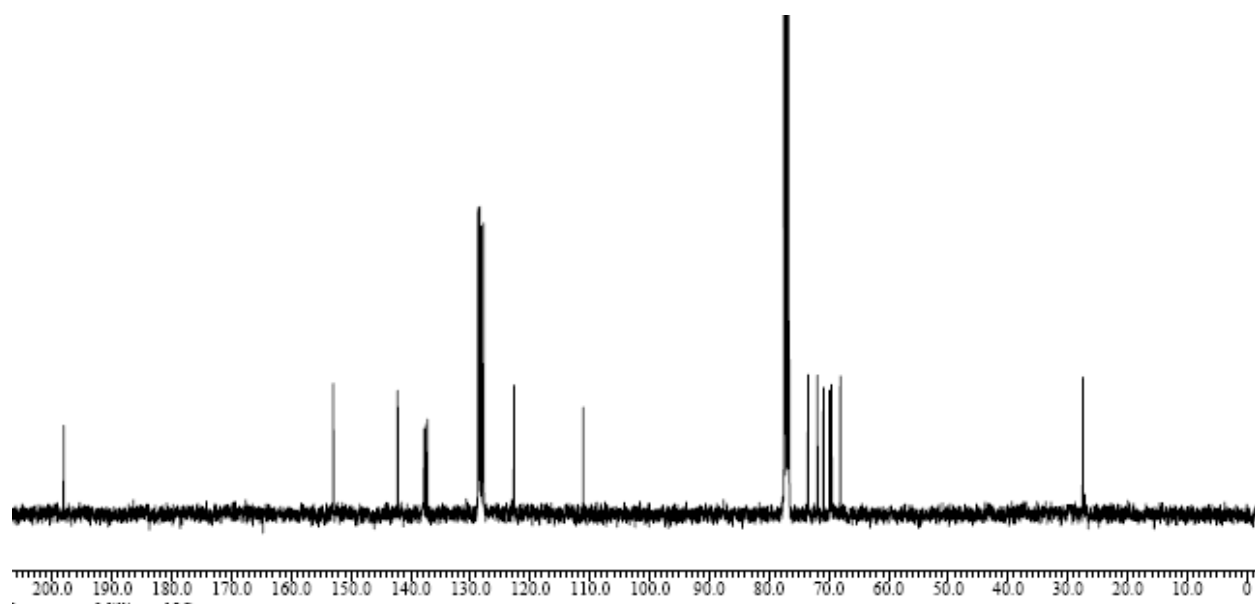

**Figure 15.2:** <sup>13</sup>C NMR (100 MHz, CDCl<sub>3</sub>) Spectrum of Compound 13

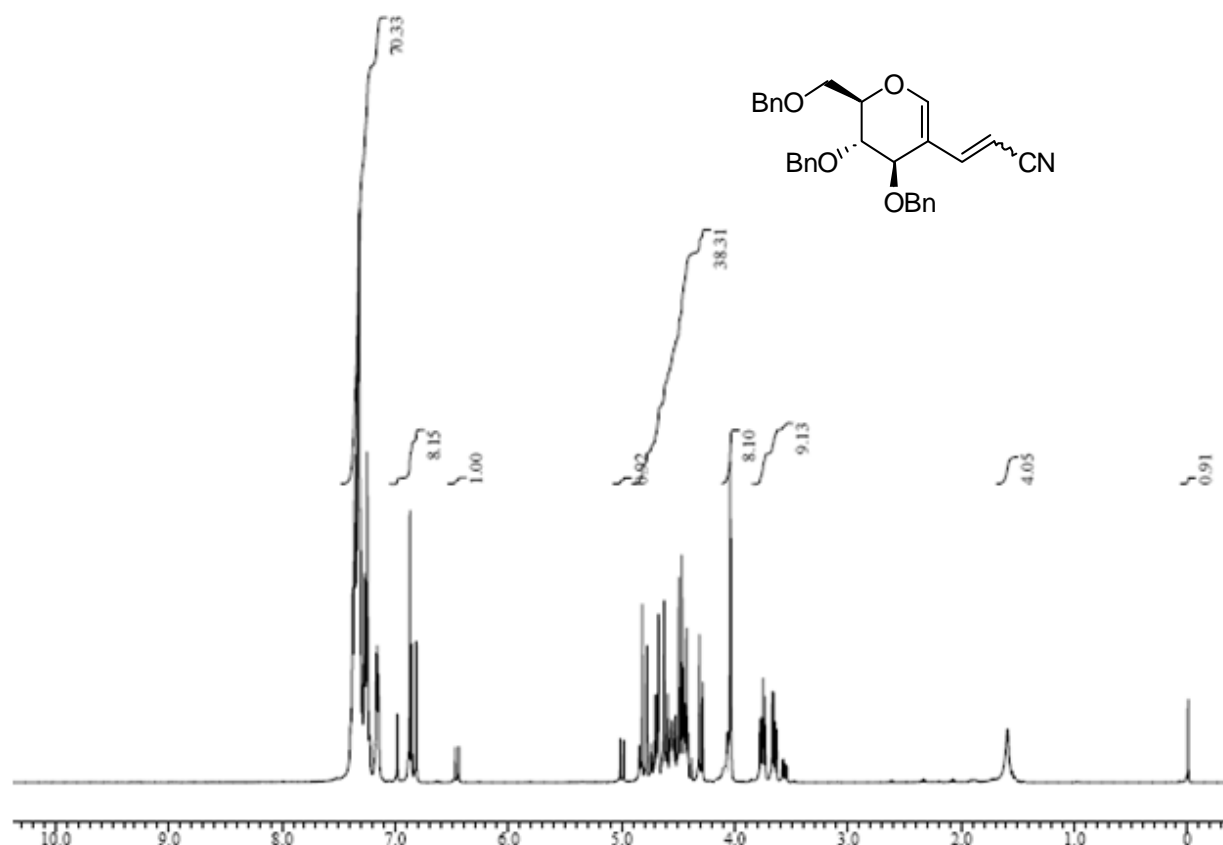

**Figure 16.1:** <sup>1</sup>H NMR (400 MHz, CDCl<sub>3</sub>) Spectrum of Compound 14

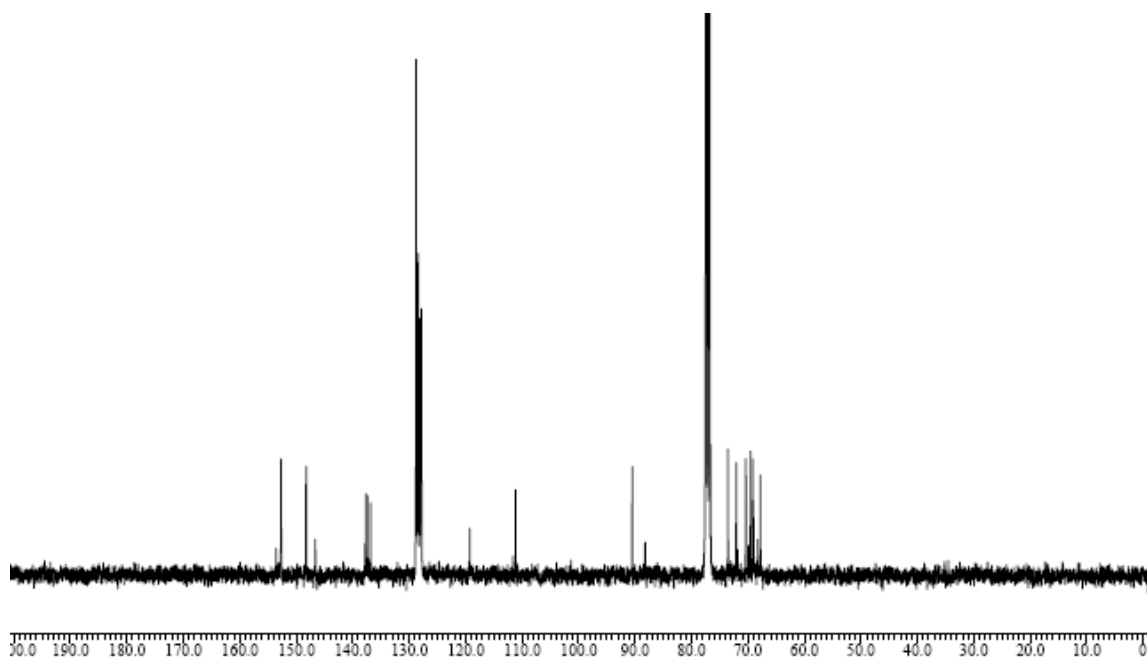

**Figure 16.2:** <sup>13</sup>C NMR (100 MHz, CDCl<sub>3</sub>) Spectrum of Compound 14

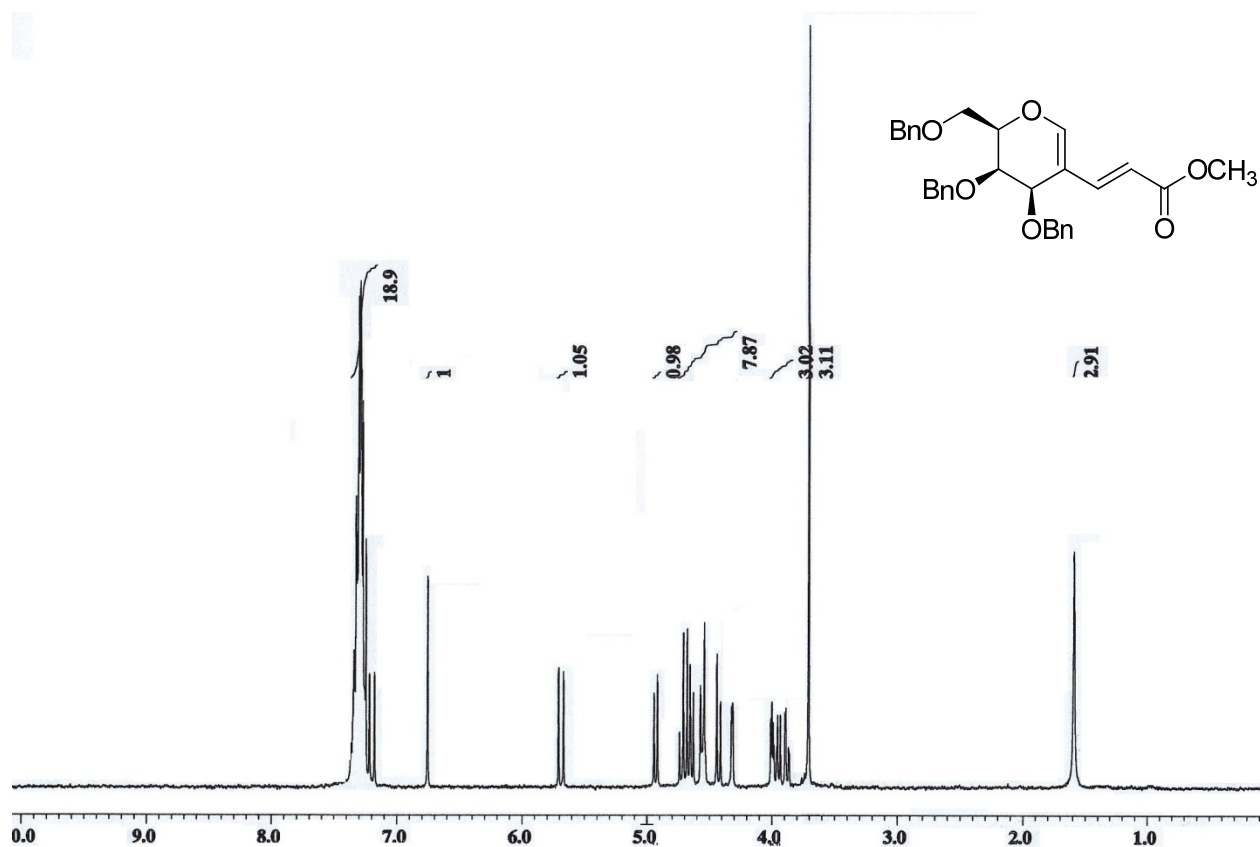

Figure 17.1: <sup>1</sup>H NMR (400 MHz, CDCl<sub>3</sub>) Spectrum of Compound 15

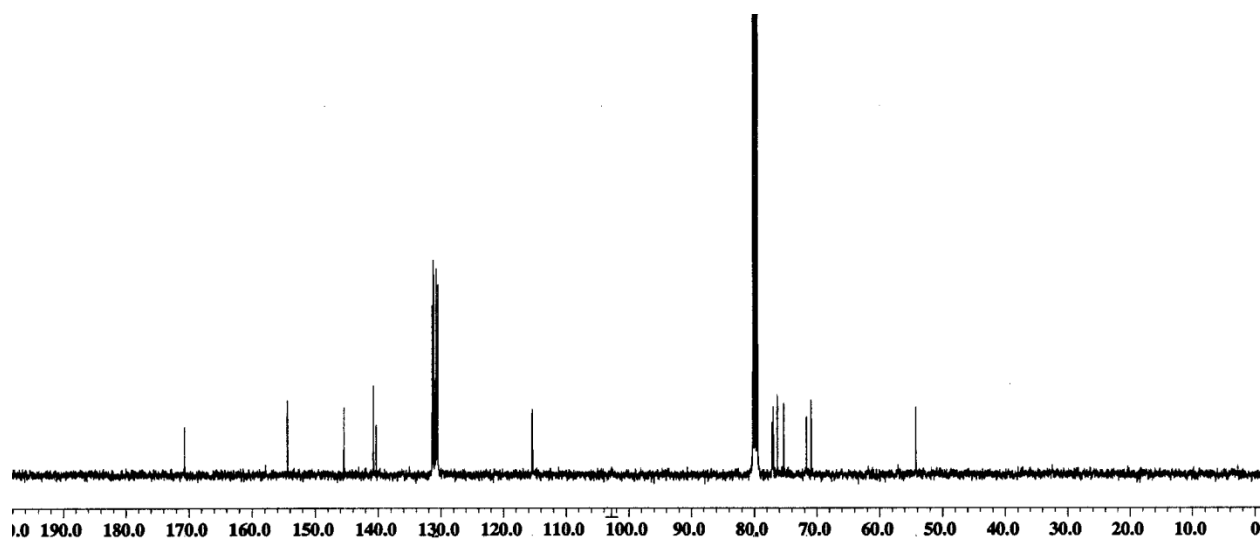

Figure 17.2: <sup>13</sup>C NMR (125 MHz, CDCl<sub>3</sub>) Spectrum of Compound 15

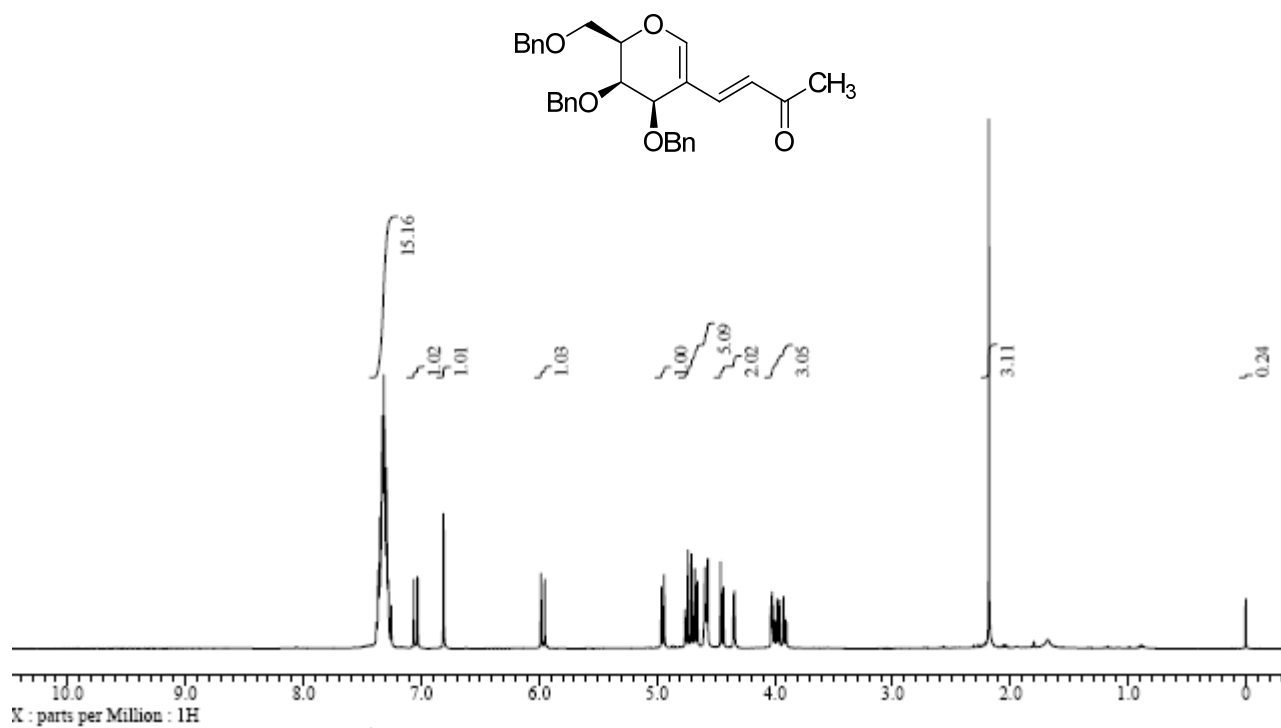

**Figure 18.1:** <sup>1</sup>H NMR (500 MHz, CDCl<sub>3</sub>) Spectrum of Compound 16

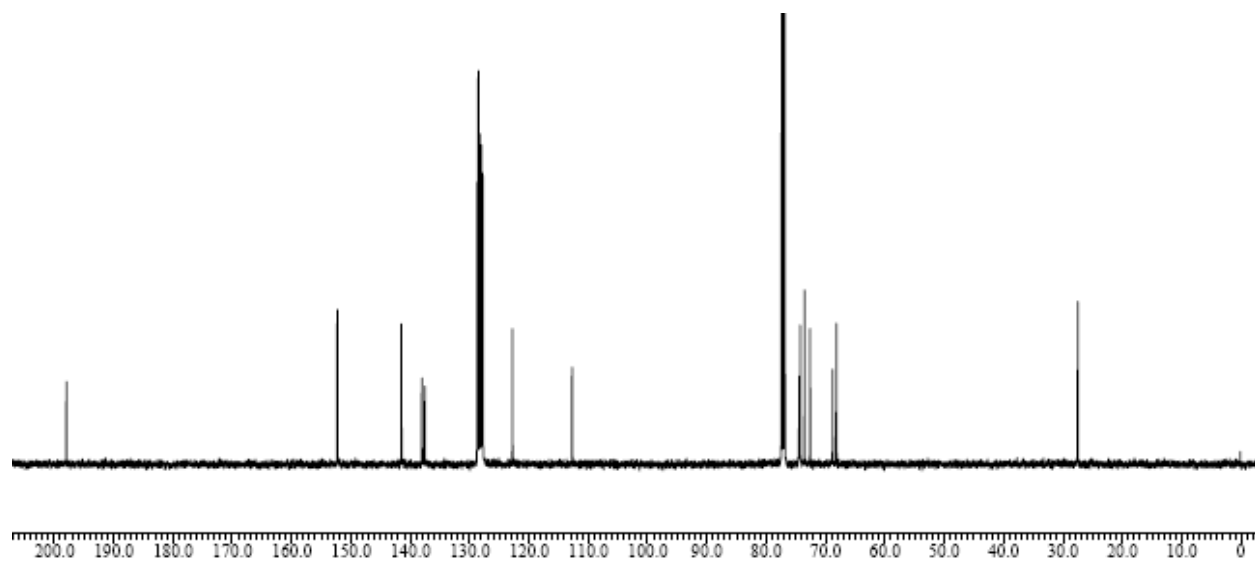

**Figure 18.2:** <sup>13</sup>C NMR (125 MHz, CDCl<sub>3</sub>) Spectrum of Compound 16

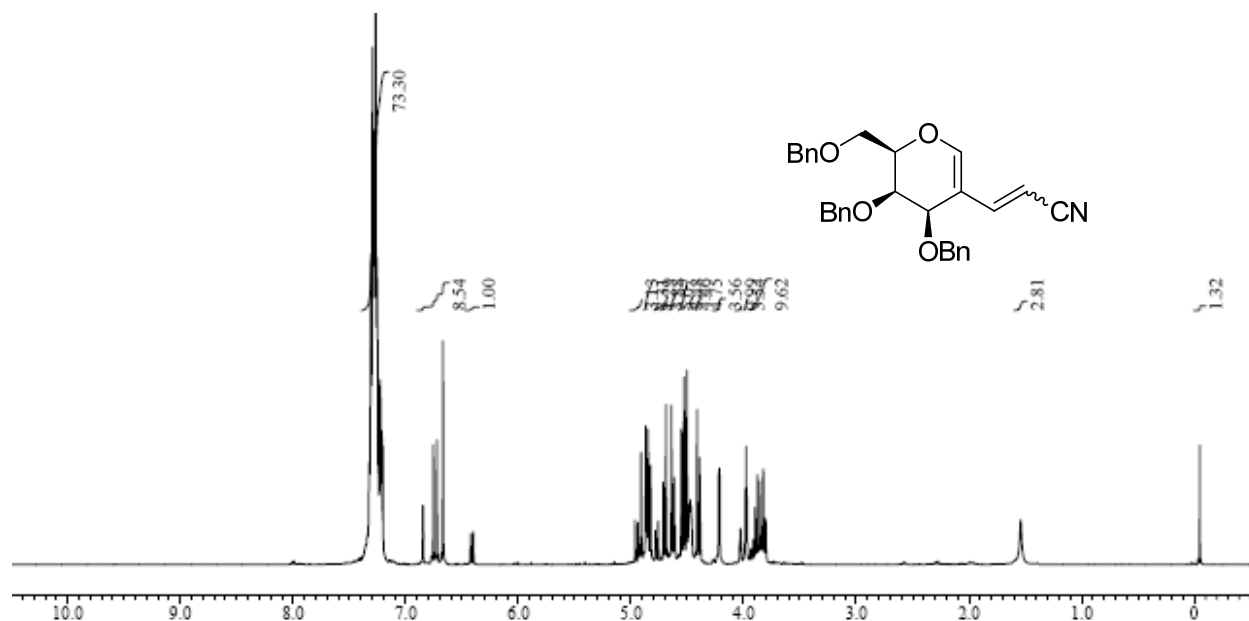

**Figure 19.1:** <sup>1</sup>H NMR (500 MHz, CDCl<sub>3</sub>) Spectrum of Compound 17

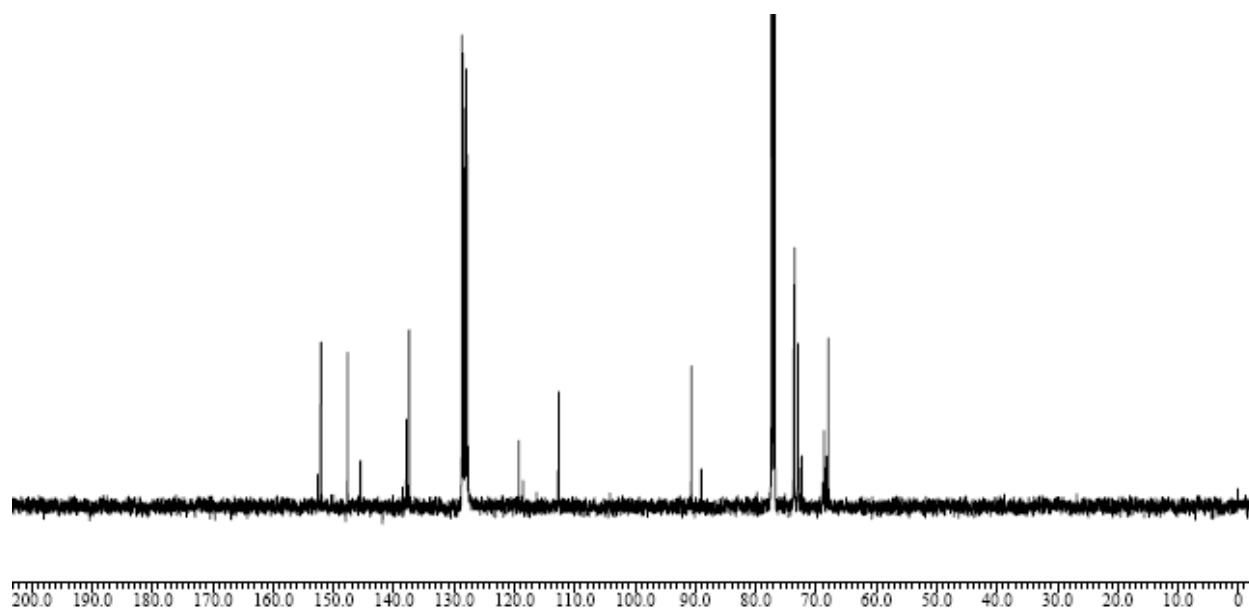

**Figure 19.2:** <sup>13</sup>C NMR (125 MHz, CDCl<sub>3</sub>) Spectrum of Compound 17

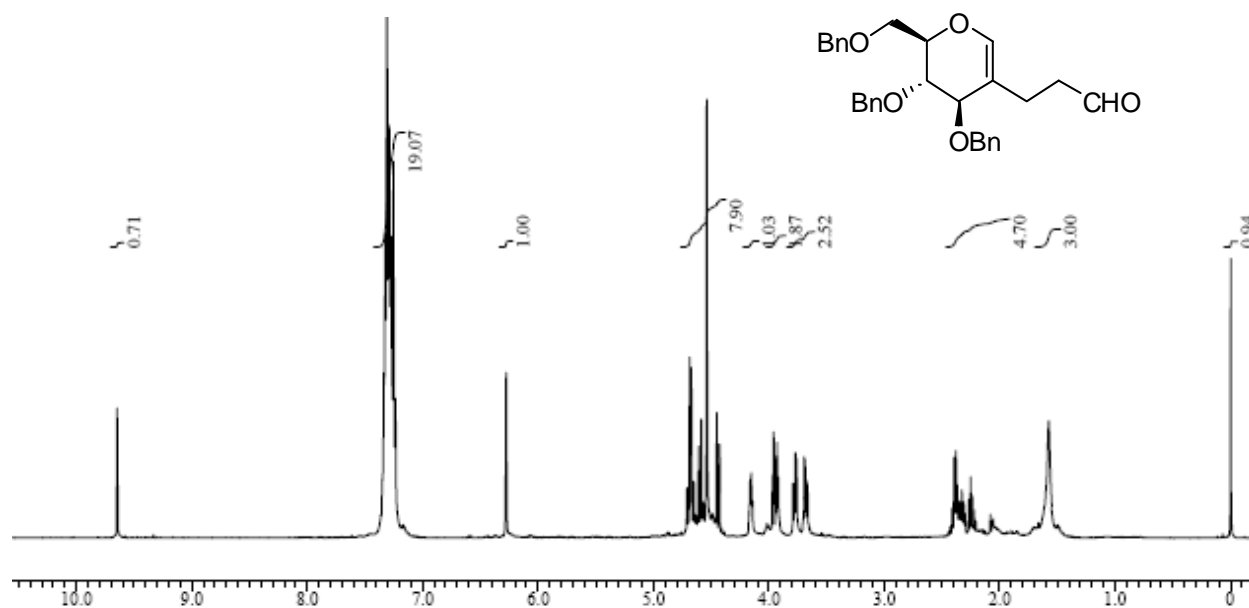

**Figure 20.1:** <sup>1</sup>H NMR (500 MHz, CDCl<sub>3</sub>) Spectrum of Compound 18

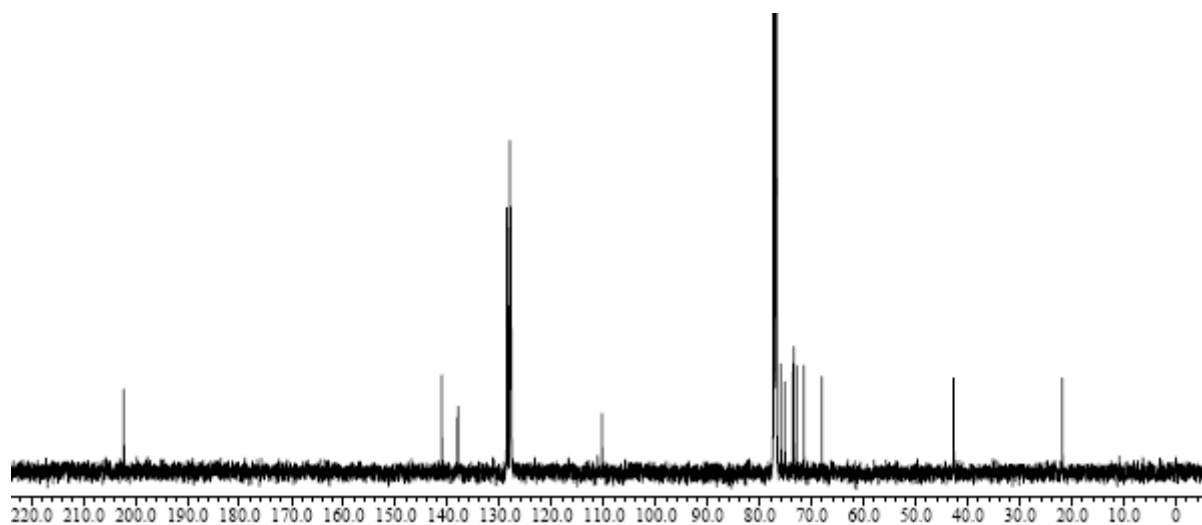

**Figure 20.2:** <sup>13</sup>C NMR (125 MHz, CDCl<sub>3</sub>) Spectrum of Compound 18

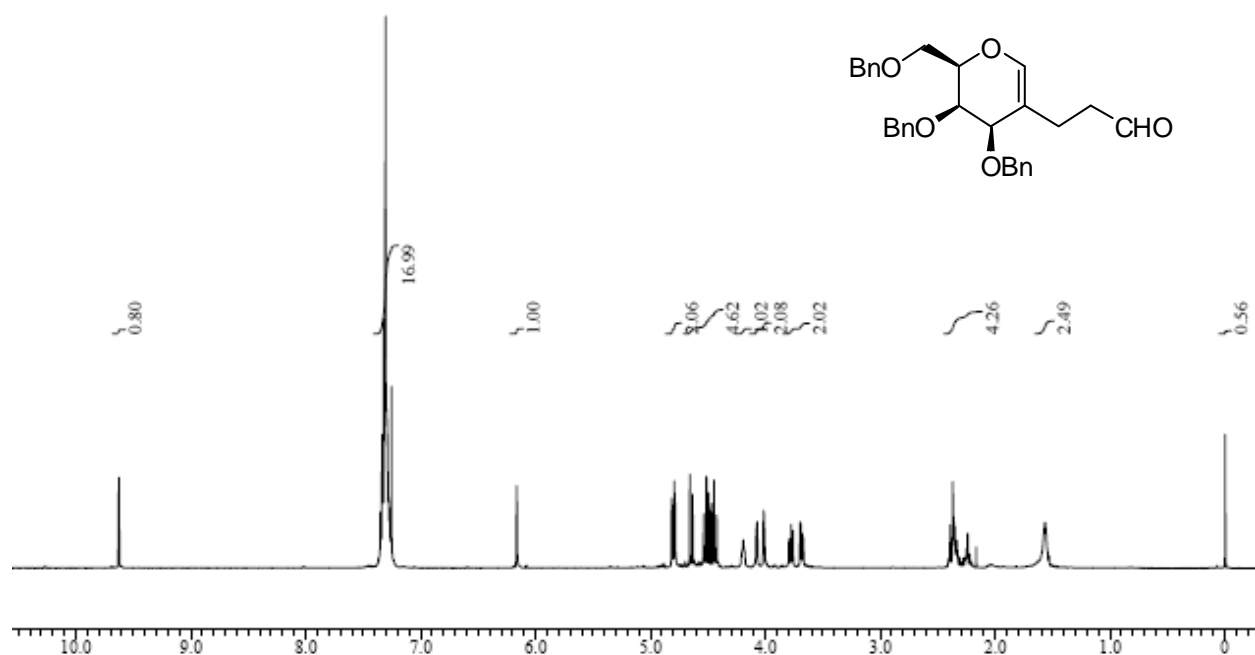

**Figure 21.1:** <sup>1</sup>H NMR (500 MHz, CDCl<sub>3</sub>) Spectrum of Compound 19

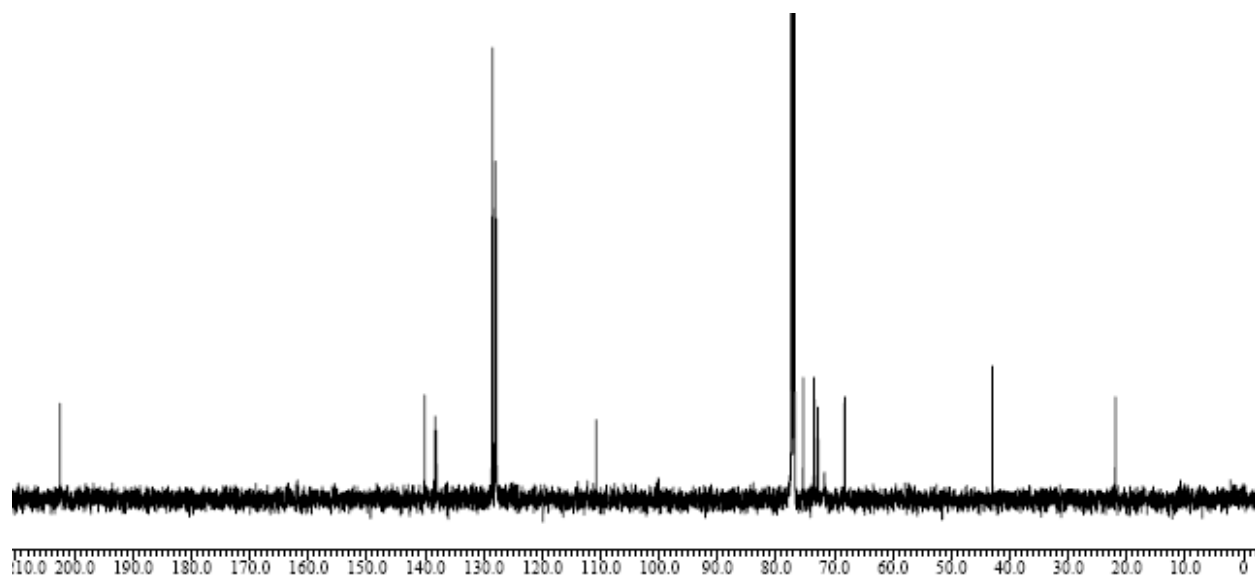

**Figure 21.2:** <sup>13</sup>C NMR (125 MHz, CDCl<sub>3</sub>) Spectrum of Compound 19

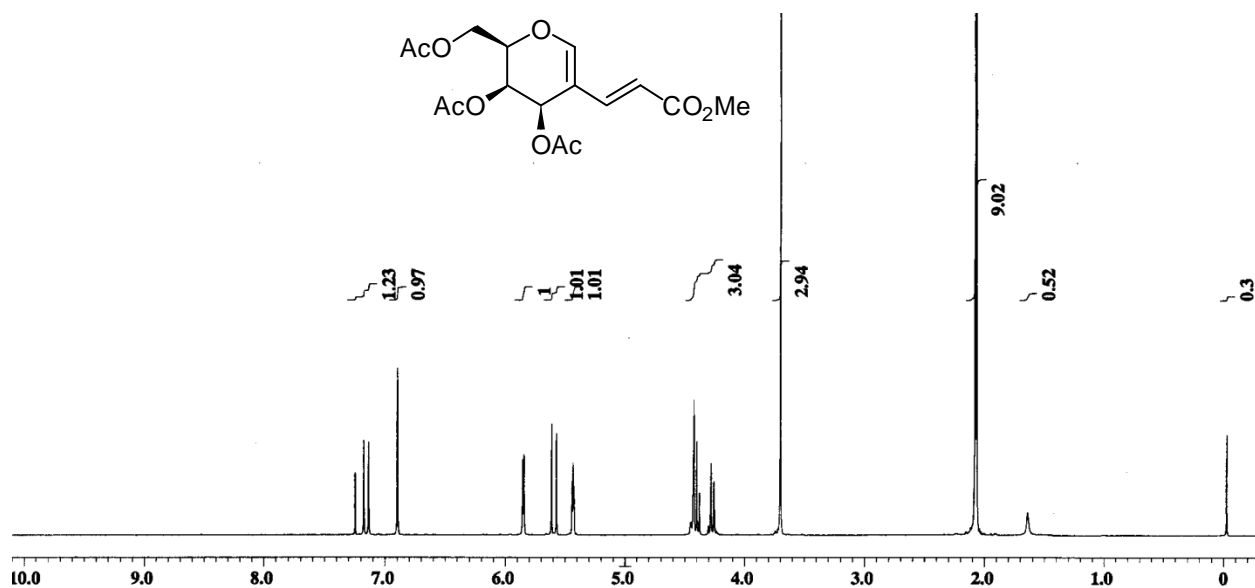

Figure 22.1: <sup>1</sup>H NMR (400 MHz, CDCl<sub>3</sub>) Spectrum of Compound 20

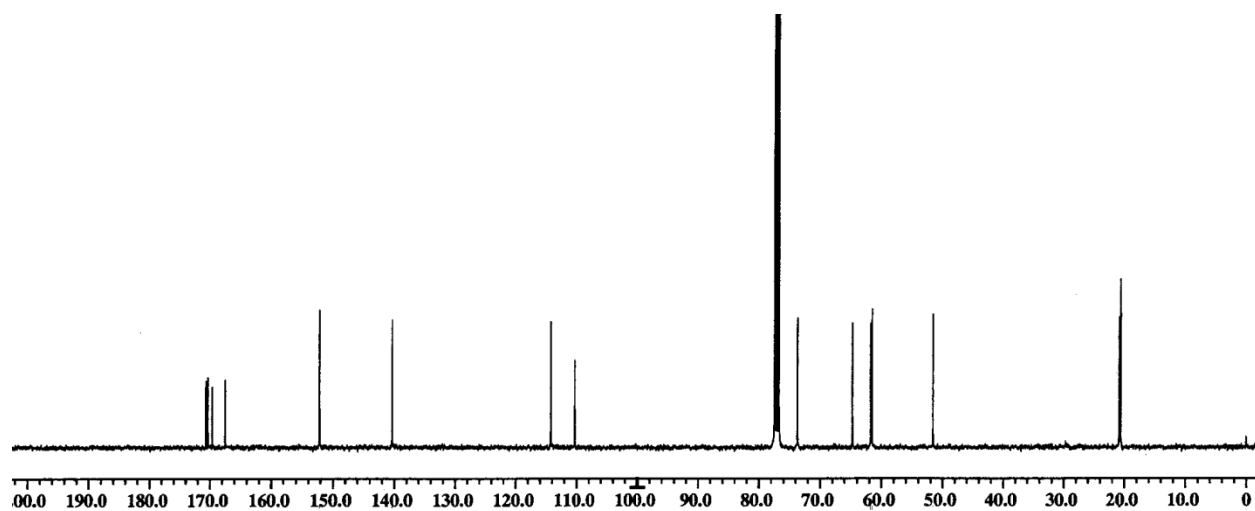

Figure 22.2: <sup>13</sup>C NMR (100 MHz, CDCl<sub>3</sub>) Spectrum of Compound 20



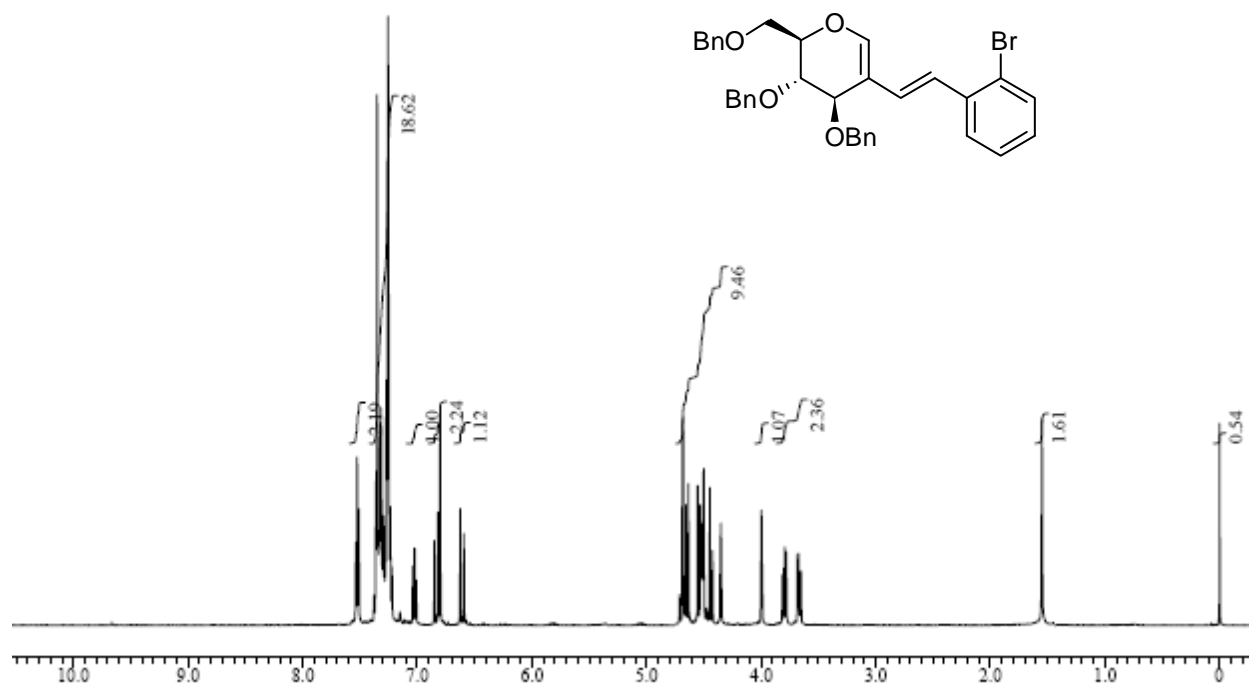

**Figure 23.1:** <sup>1</sup>H NMR (500 MHz, CDCl<sub>3</sub>) Spectrum of Compound 21

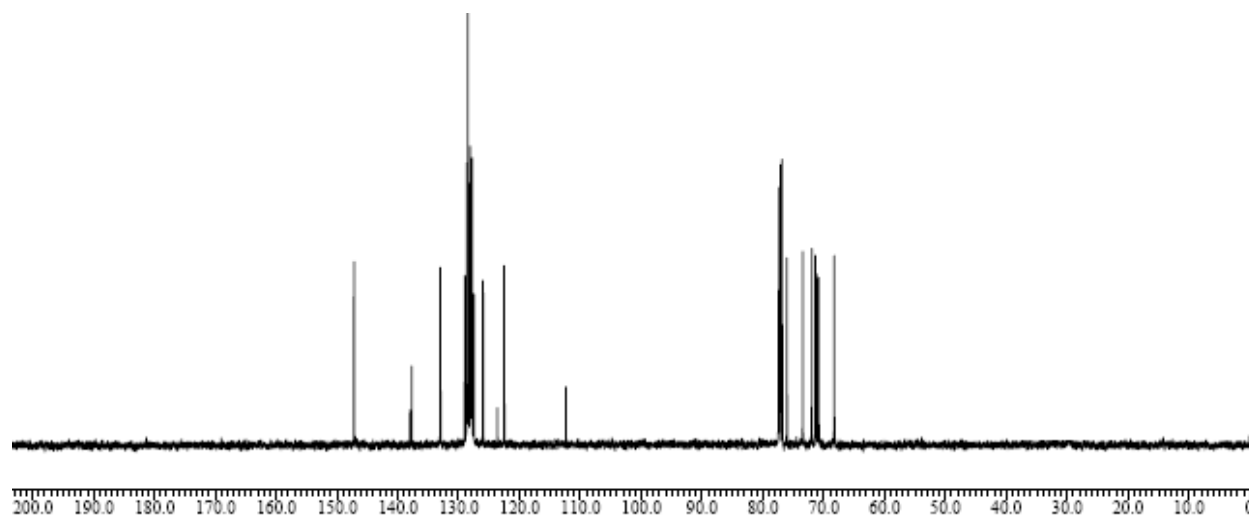

**Figure 23.2:** <sup>13</sup>C NMR (125 MHz, CDCl<sub>3</sub>) Spectrum of Compound 21

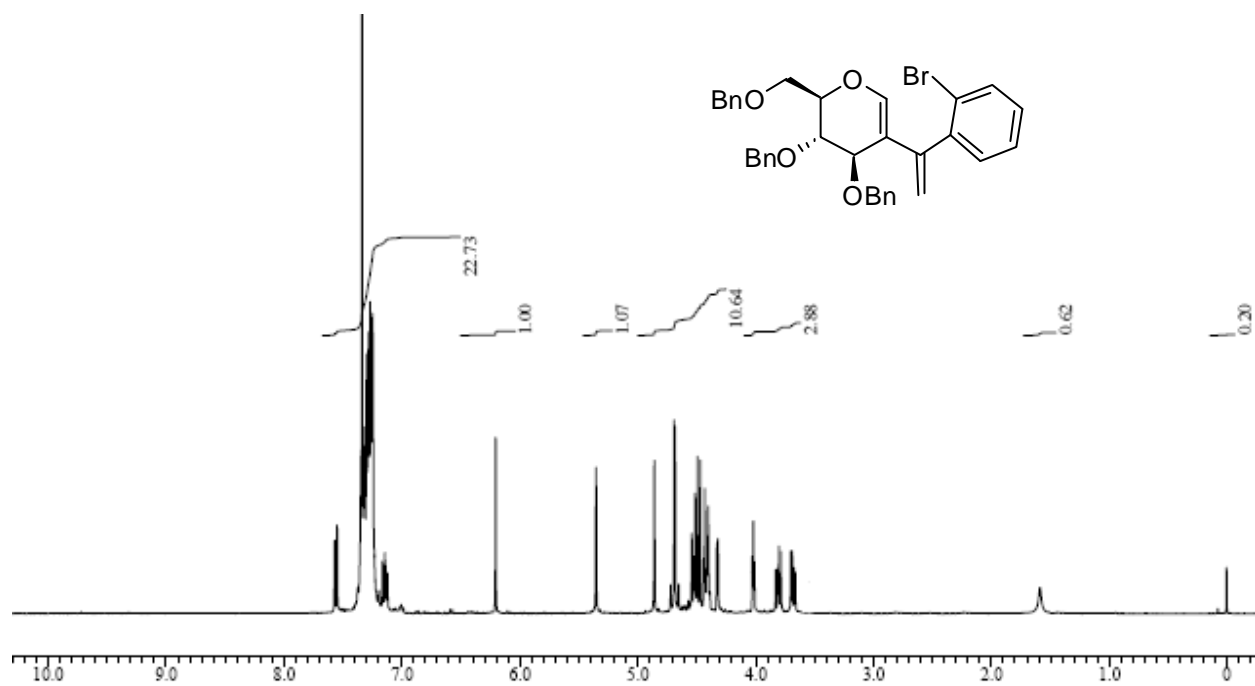

**Figure 24.1:** <sup>1</sup>H NMR (400 MHz, CDCl<sub>3</sub>) Spectrum of Compound 22

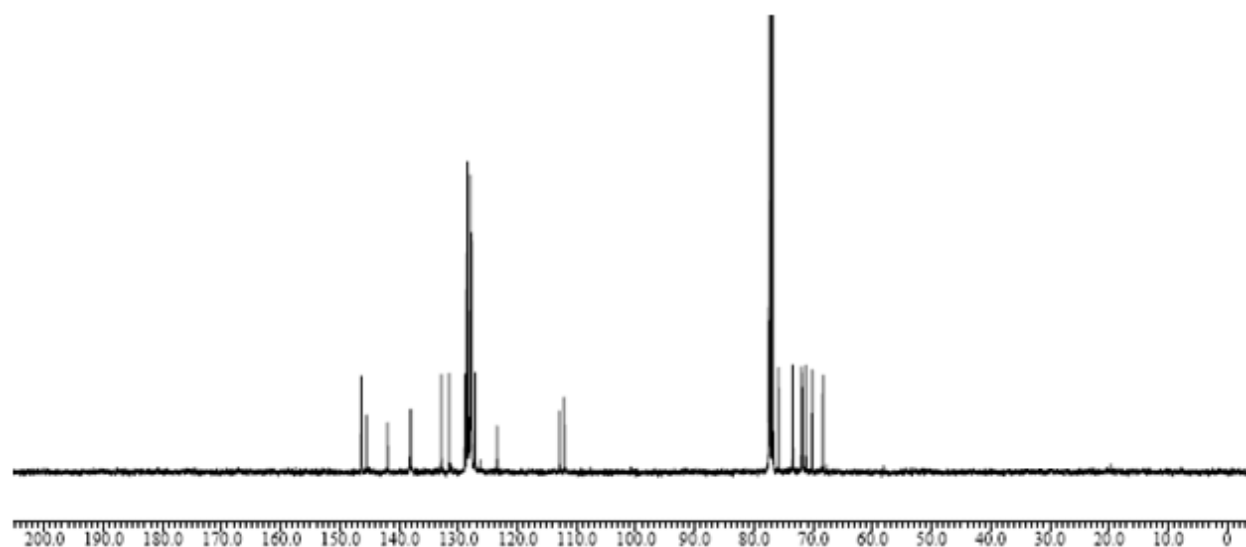

**Figure 24.2:** <sup>13</sup>C NMR (100 MHz, CDCl<sub>3</sub>) Spectrum of Compound 22

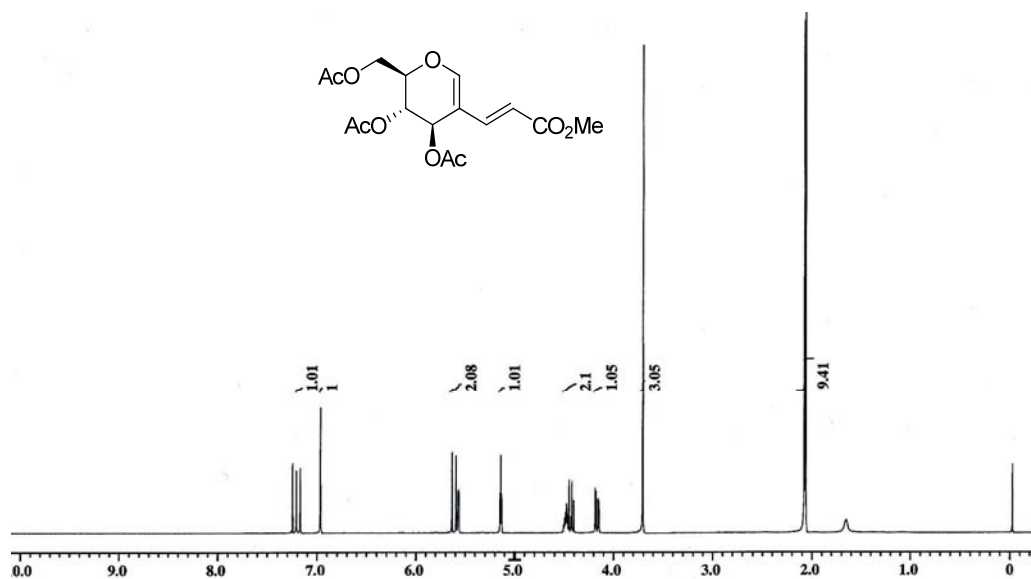

**Figure 25.1:**  $^1\text{H}$  NMR (400 MHz,  $\text{CDCl}_3$ ) Spectrum of Compound 23

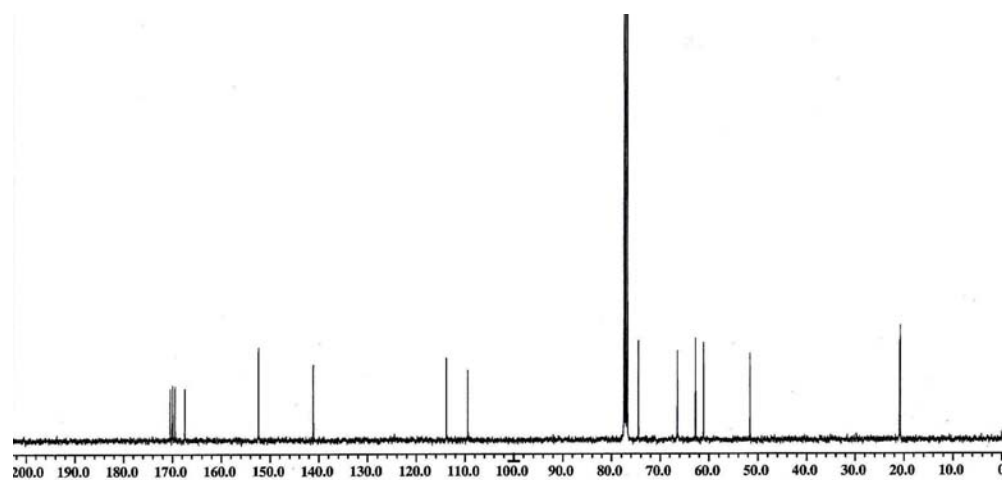

**Figure 25.2:**  $^{13}\text{C}$  NMR (100 MHz,  $\text{CDCl}_3$ ) Spectrum of Compound 23

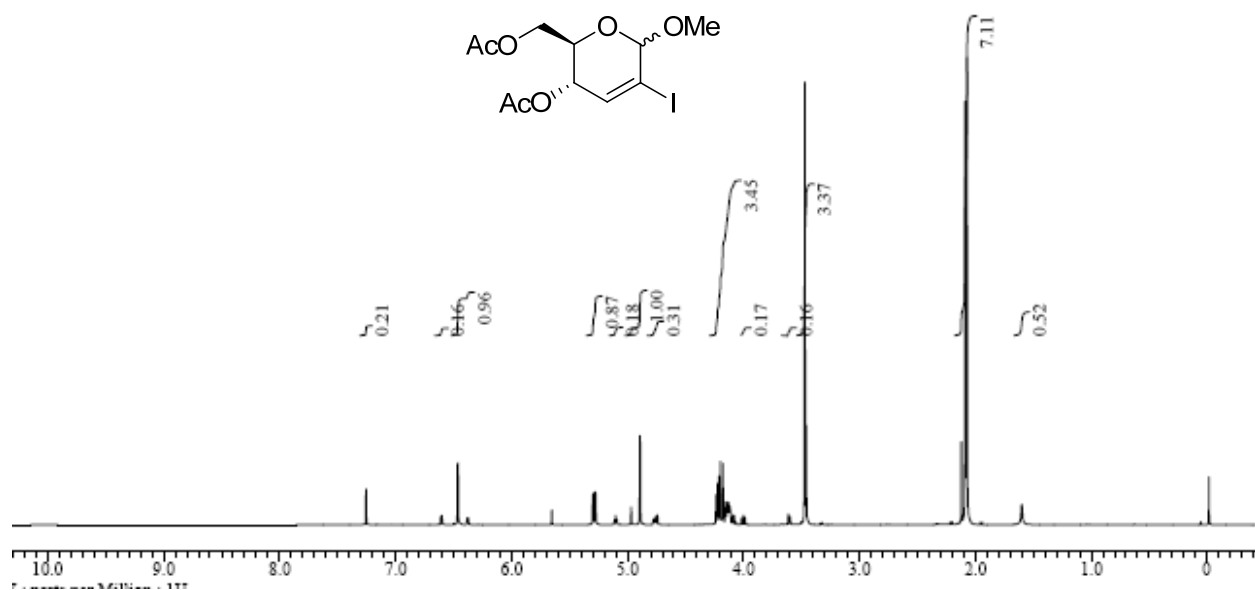

**Figure 26.1:** <sup>1</sup>H NMR (400 MHz, CDCl<sub>3</sub>) Spectrum of Compound 24

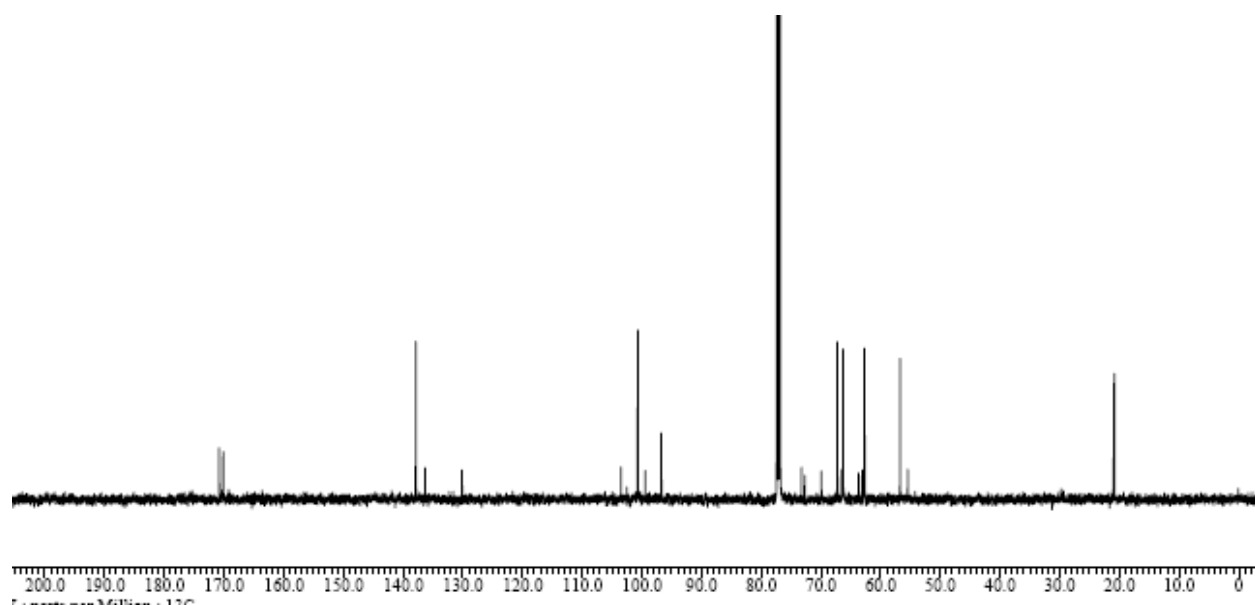

**Figure 26.2:** <sup>13</sup>C NMR (100 MHz, CDCl<sub>3</sub>) Spectrum of Compound 24

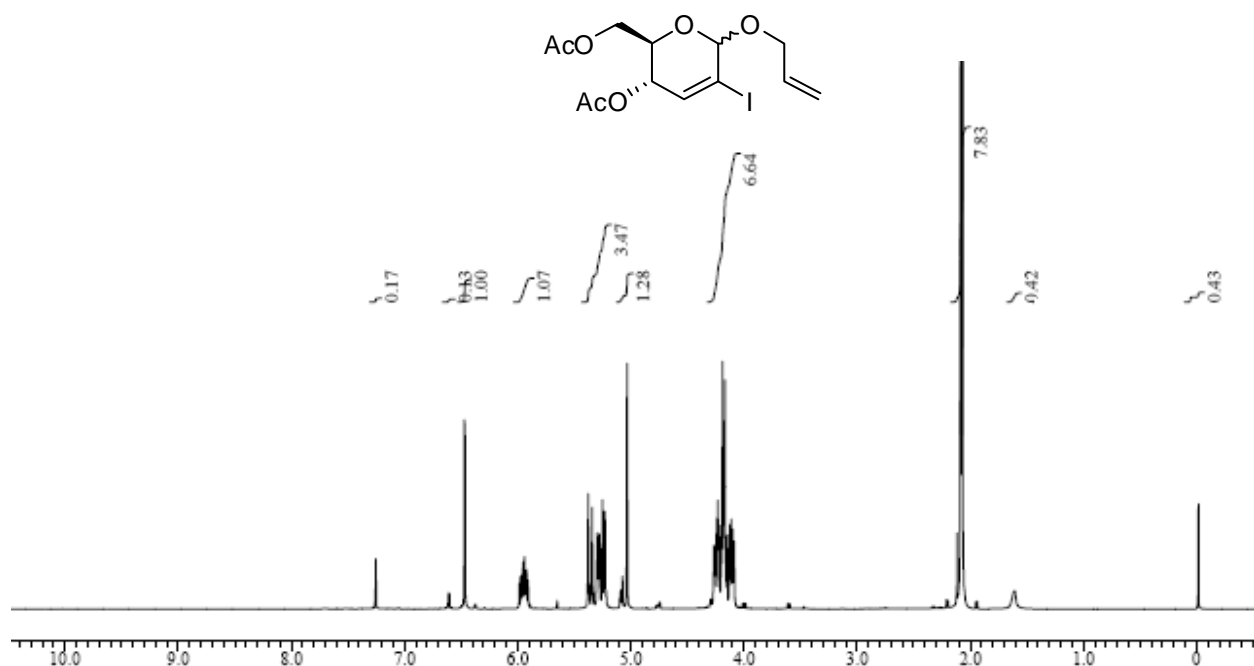

**Figure 27.1:** <sup>1</sup>H NMR (500 MHz, CDCl<sub>3</sub>) Spectrum of Compound 25

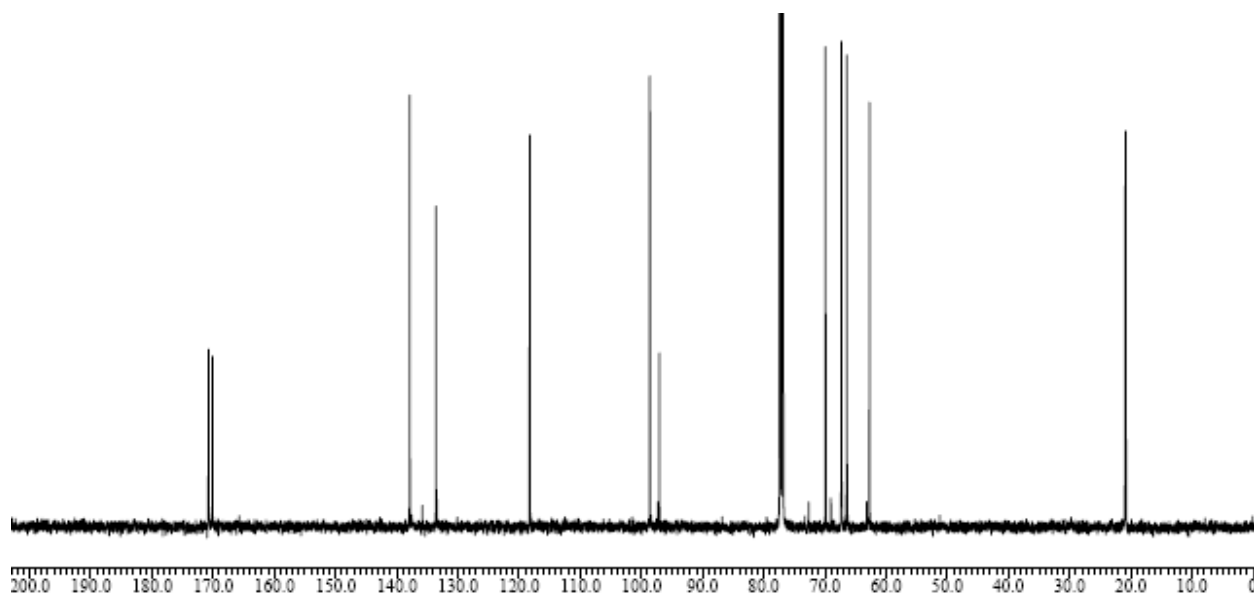

**Figure 27.2:** <sup>13</sup>C NMR (100 MHz, CDCl<sub>3</sub>) Spectrum of Compound 25

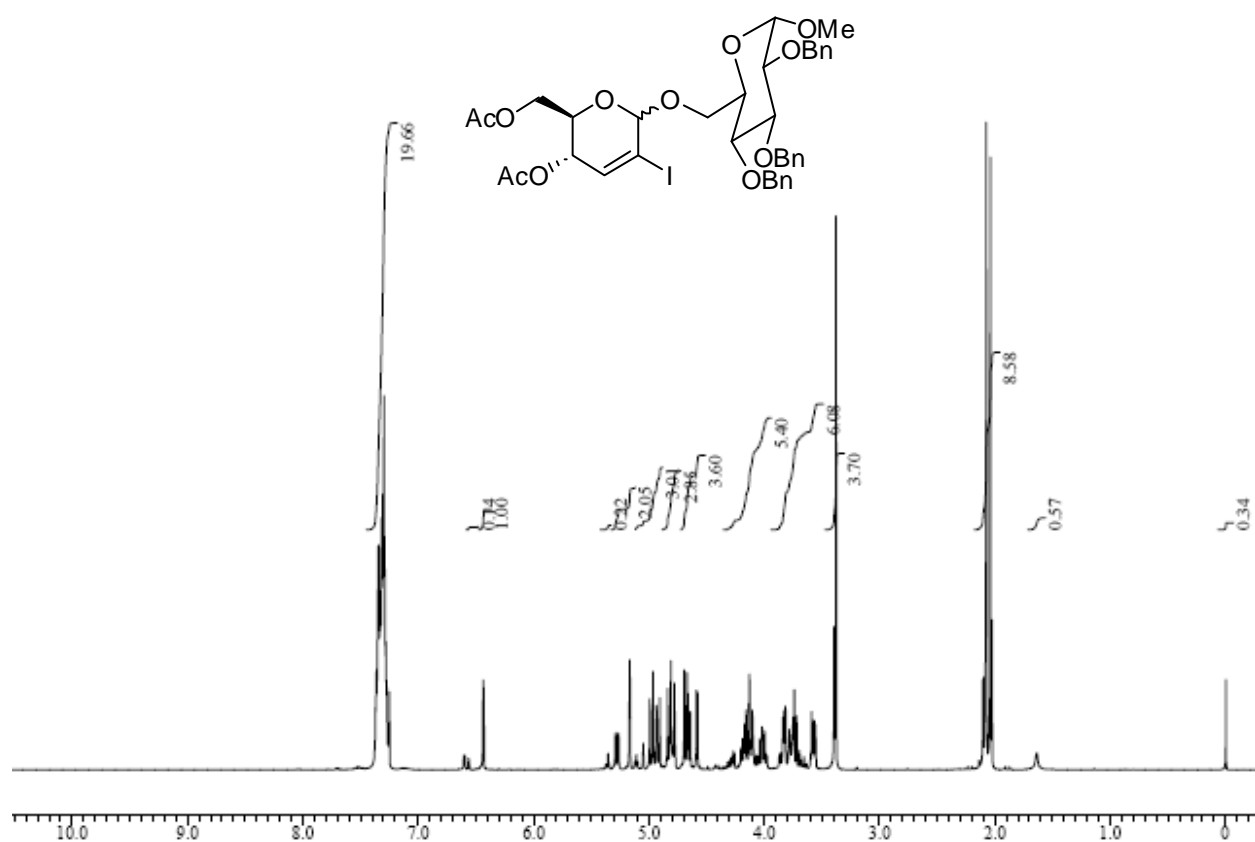

**Figure 28.1:**  $^1\text{H}$  NMR (400 MHz,  $\text{CDCl}_3$ ) Spectrum of Compound 26

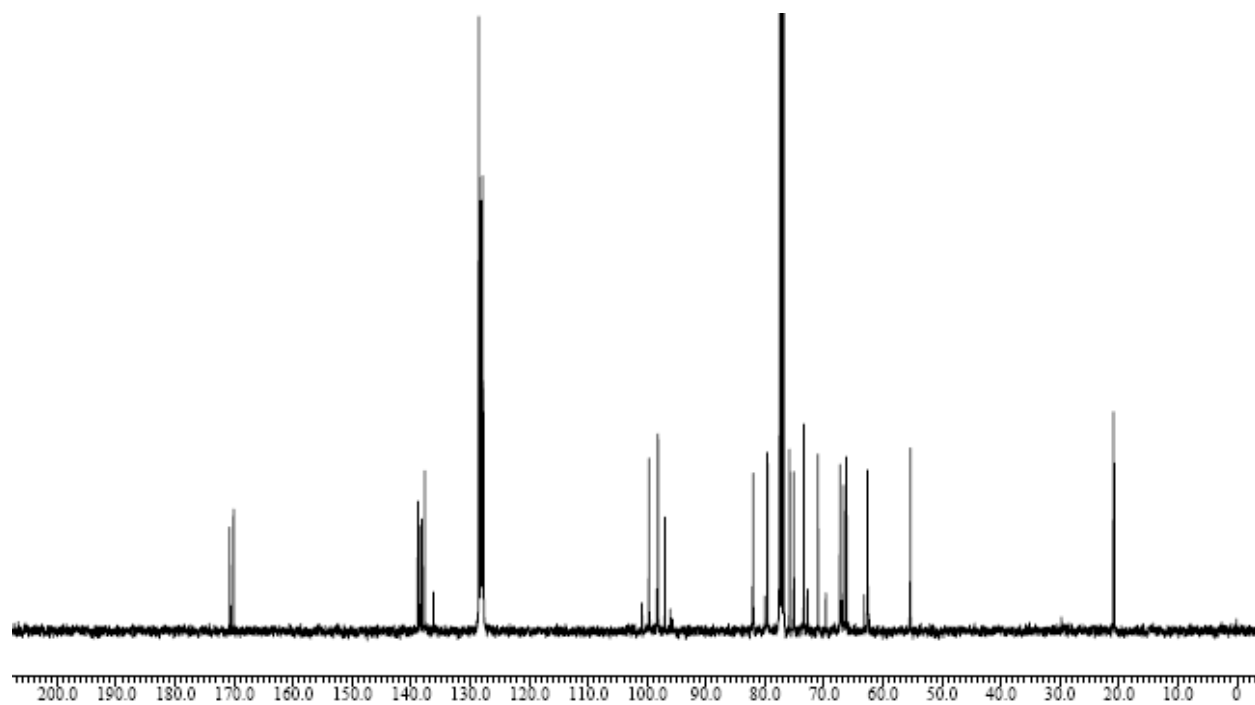

**Figure 28.2:**  $^{13}\text{C}$  NMR (100 MHz,  $\text{CDCl}_3$ ) Spectrum of Compound 26

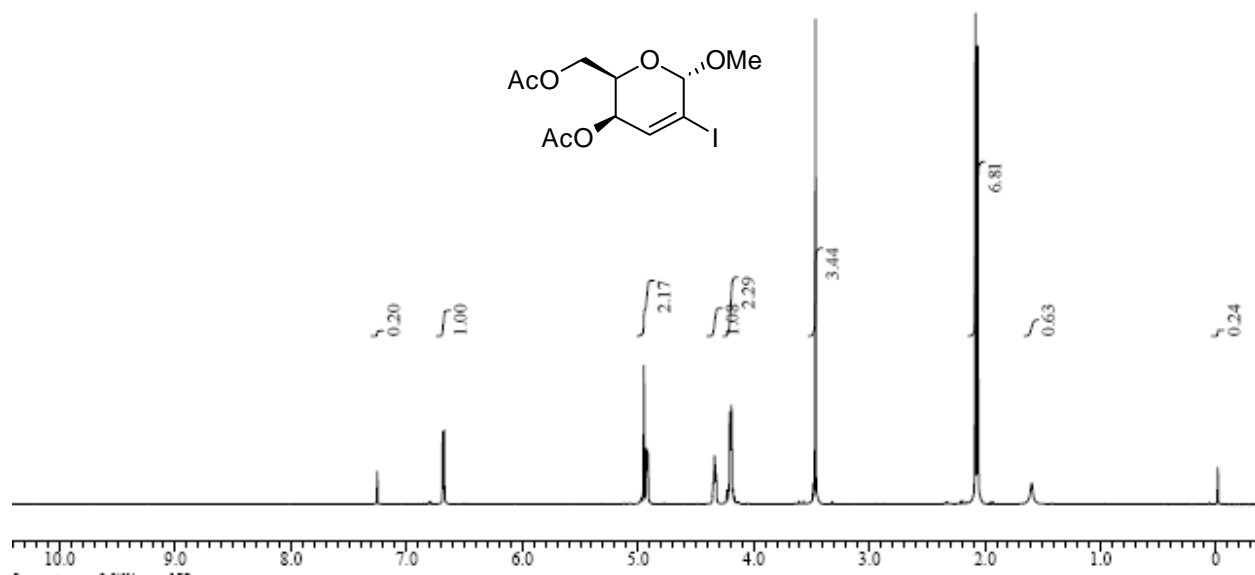

**Figure 29.1:** <sup>1</sup>H NMR (500 MHz, CDCl<sub>3</sub>) Spectrum of Compound 27

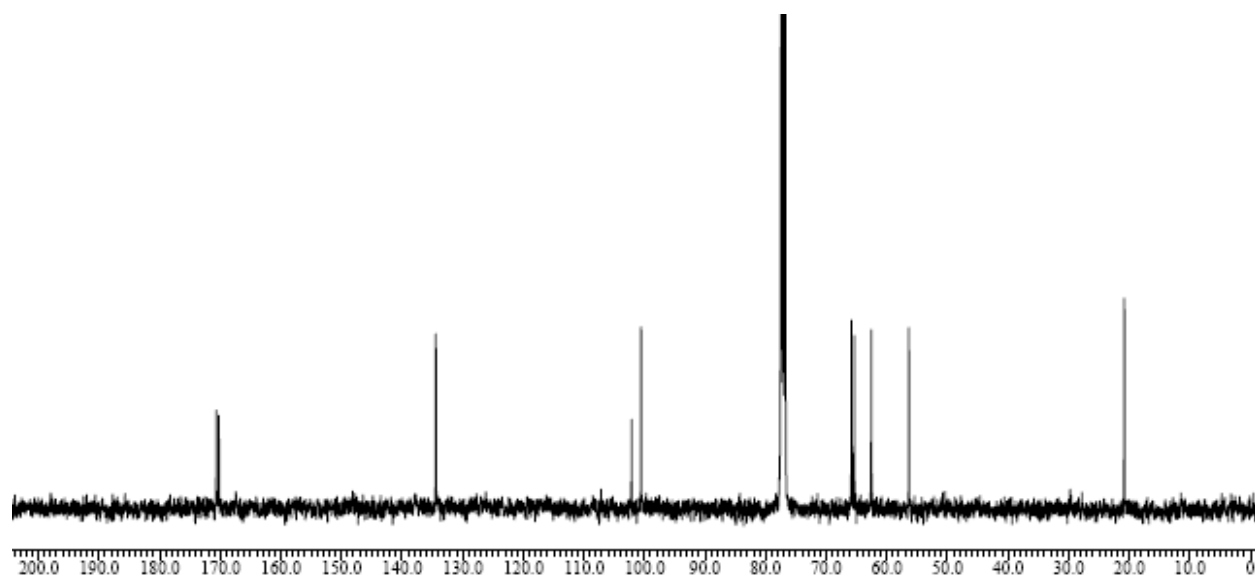

**Figure 29.2:** <sup>13</sup>C NMR (100 MHz, CDCl<sub>3</sub>) Spectrum of Compound 27

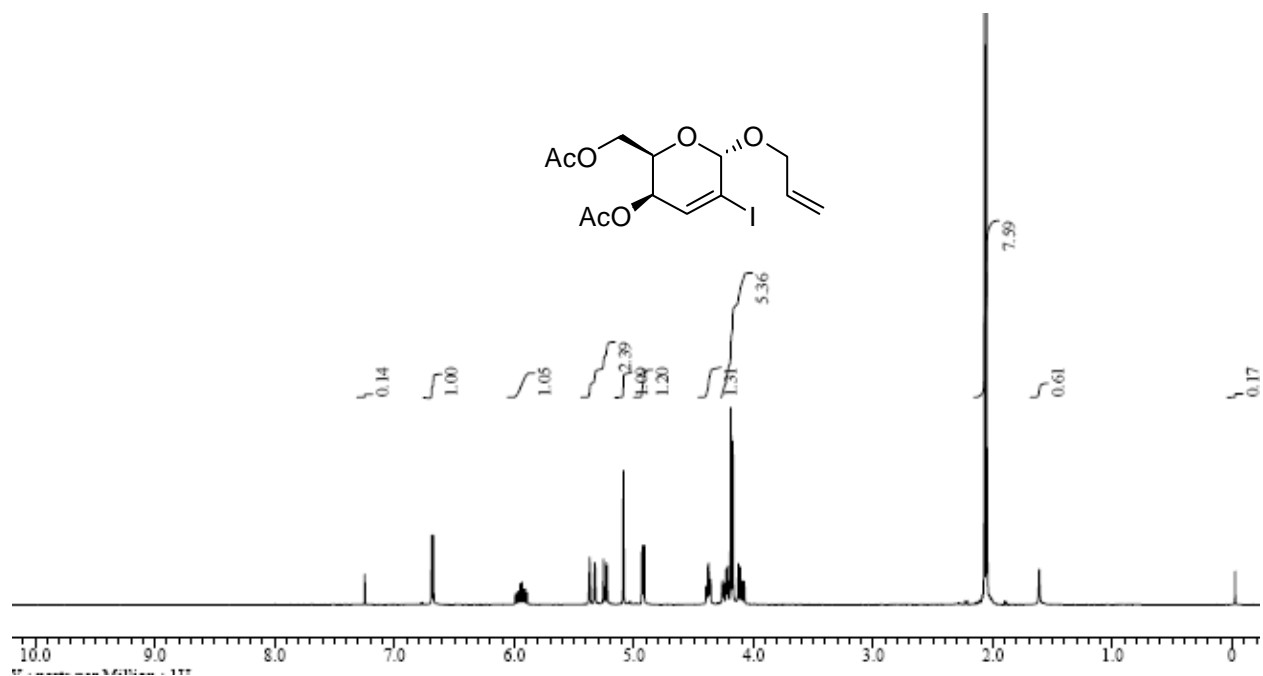

**Figure 30.1:** <sup>1</sup>H NMR (400 MHz, CDCl<sub>3</sub>) Spectrum of Compound 28

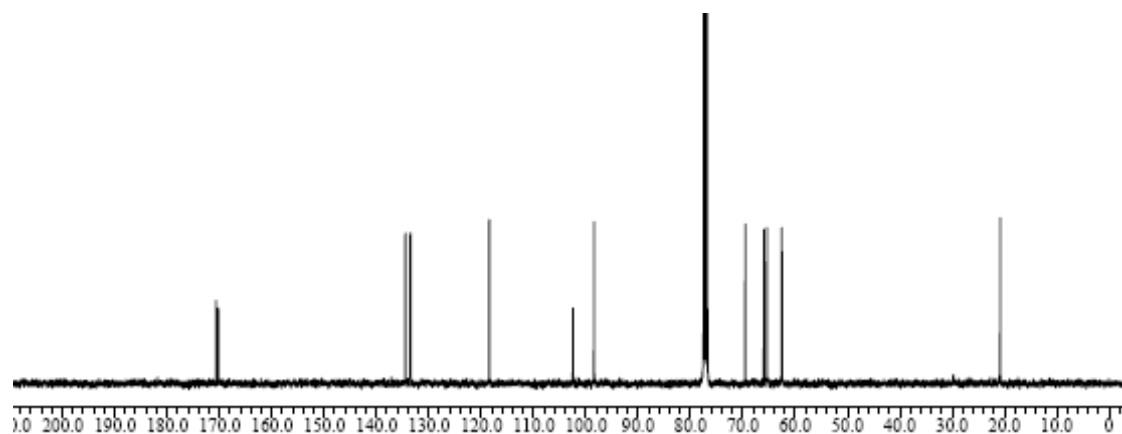

**Figure 30.2:** <sup>13</sup>C NMR (100 MHz, CDCl<sub>3</sub>) Spectrum of Compound 28



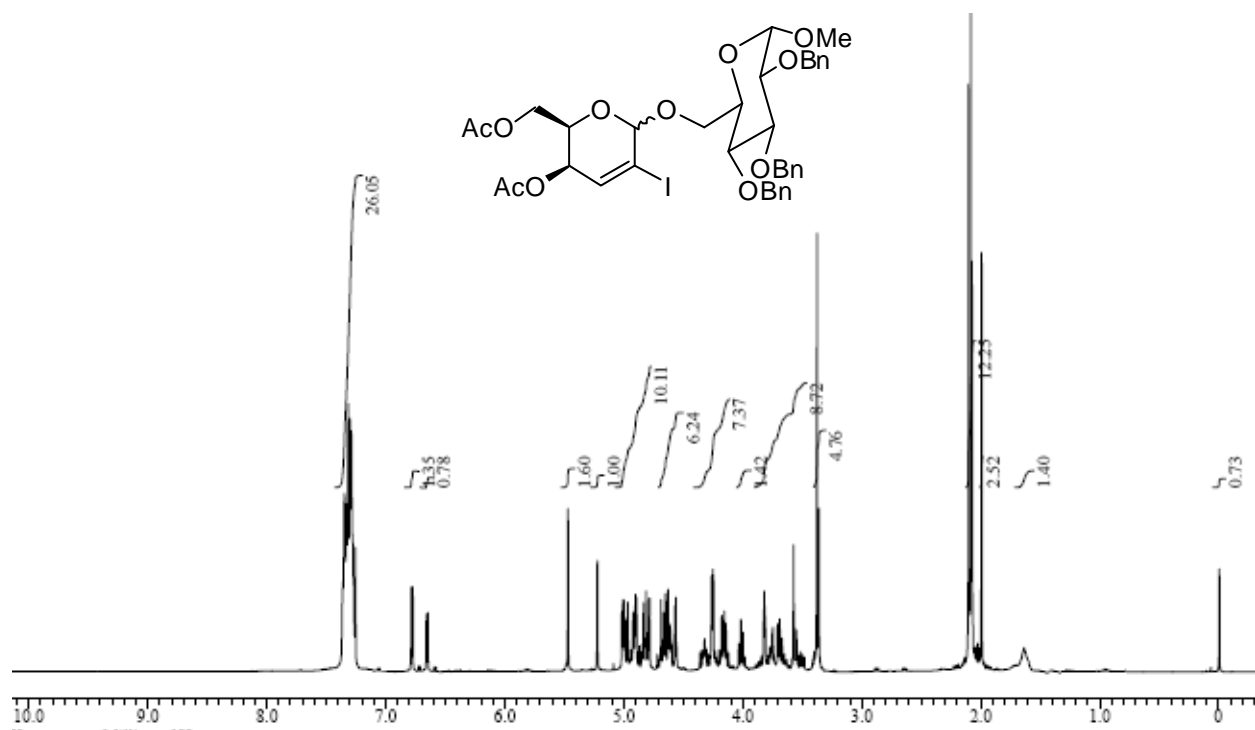

**Figure 31.1:** <sup>1</sup>H NMR (500 MHz, CDCl<sub>3</sub>) Spectrum of Compound 29

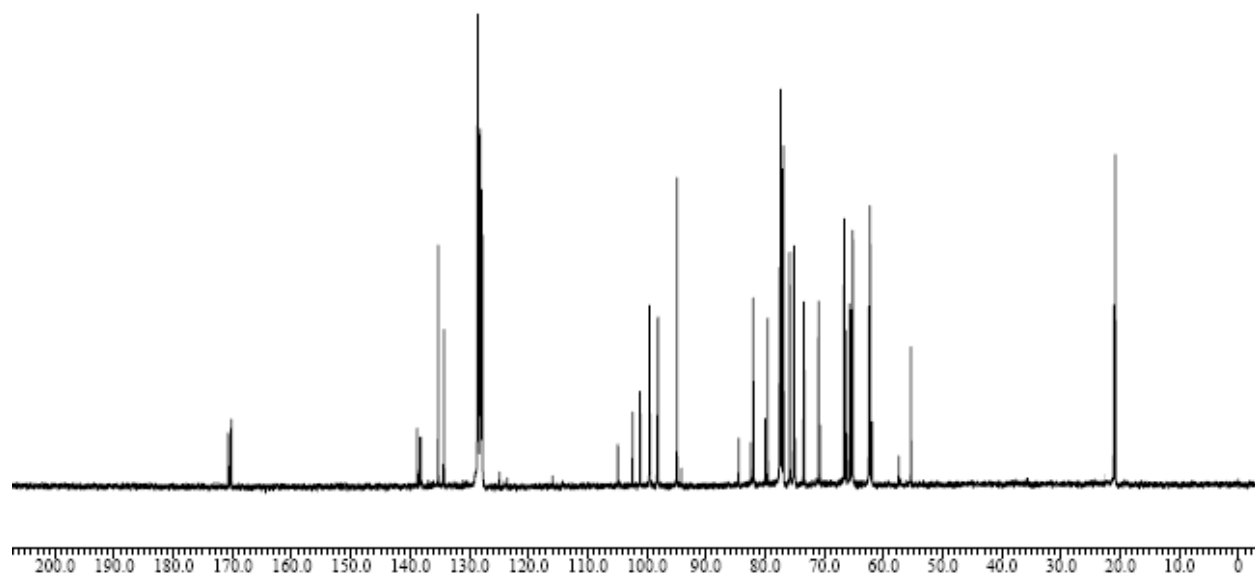

**Figure 31.2:** <sup>13</sup>C NMR (125 MHz, CDCl<sub>3</sub>) Spectrum of Compound 29

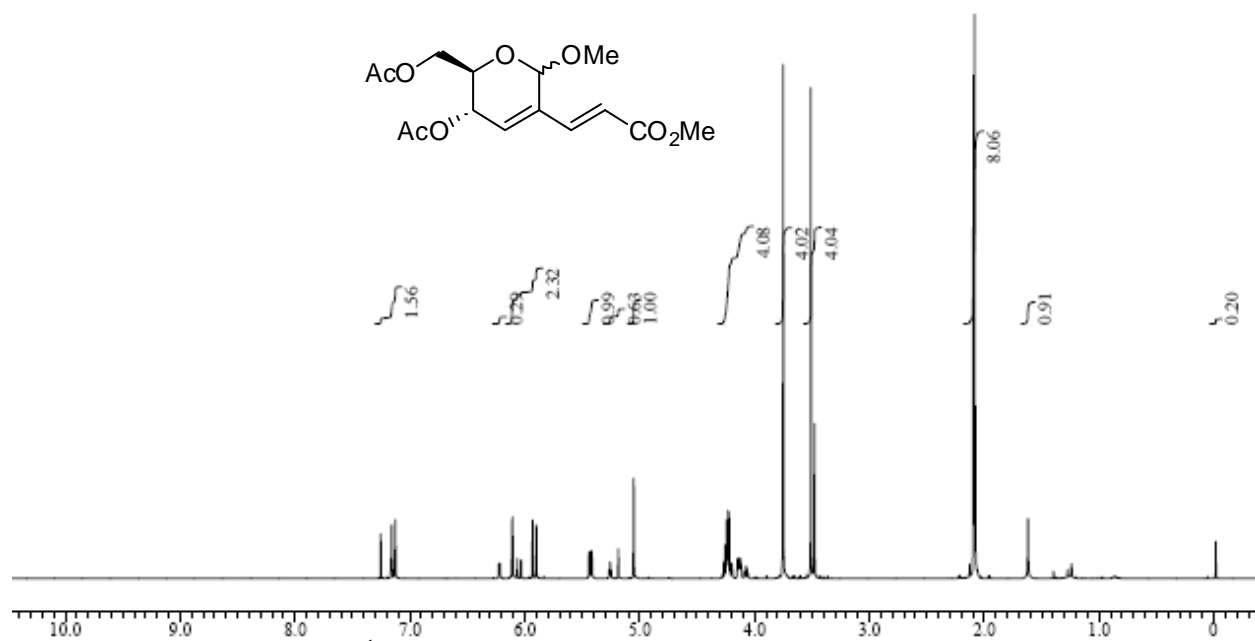

**Figure 32.1:** <sup>1</sup>H NMR (500 MHz, CDCl<sub>3</sub>) Spectrum of Compound 30

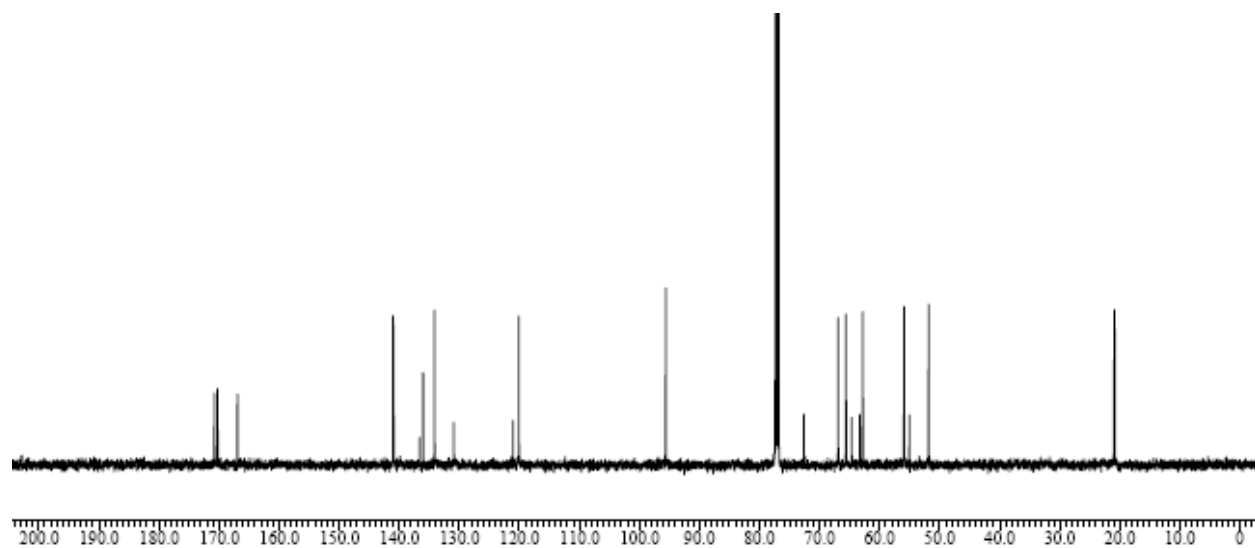

**Figure 32.2:** <sup>13</sup>C NMR (125 MHz, CDCl<sub>3</sub>) Spectrum of Compound 30

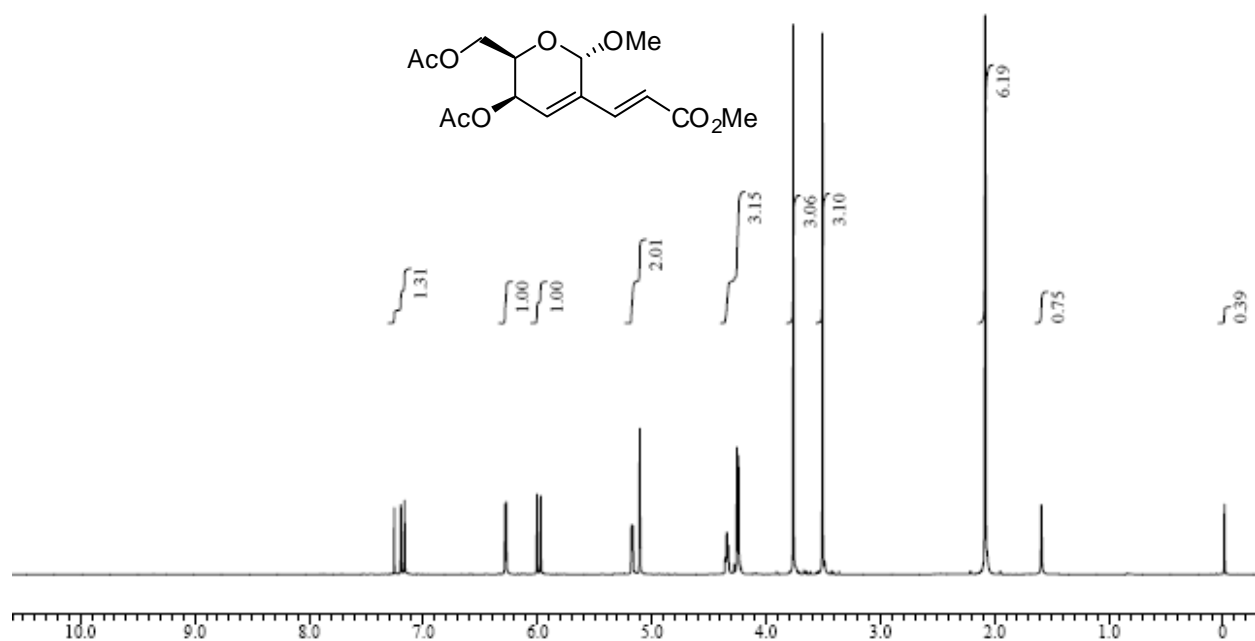

**Figure 33.1:** <sup>1</sup>H NMR (500 MHz, CDCl<sub>3</sub>) Spectrum of Compound 31

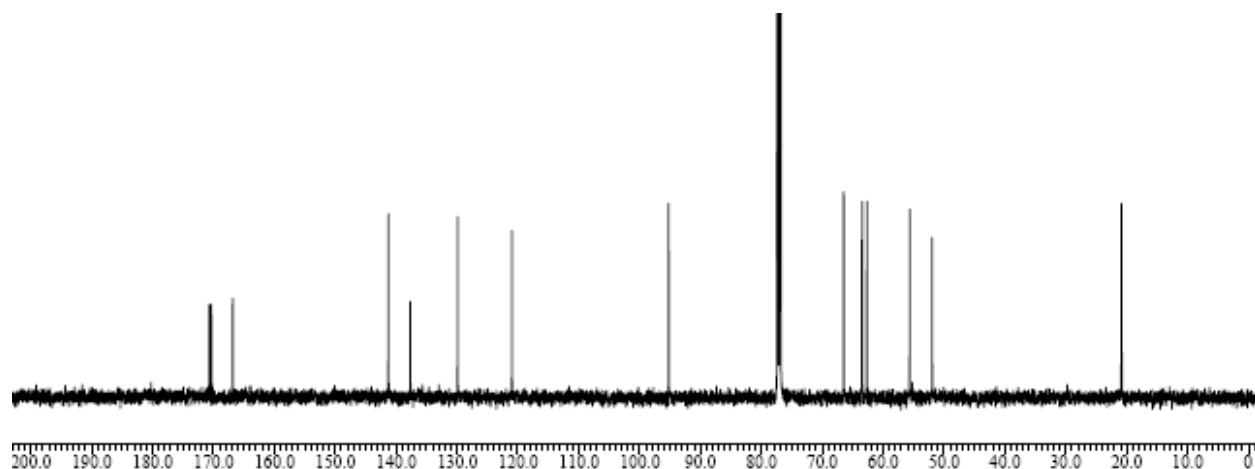

**Figure 33.2:** <sup>13</sup>C NMR (125 MHz, CDCl<sub>3</sub>) Spectrum of Compound 31

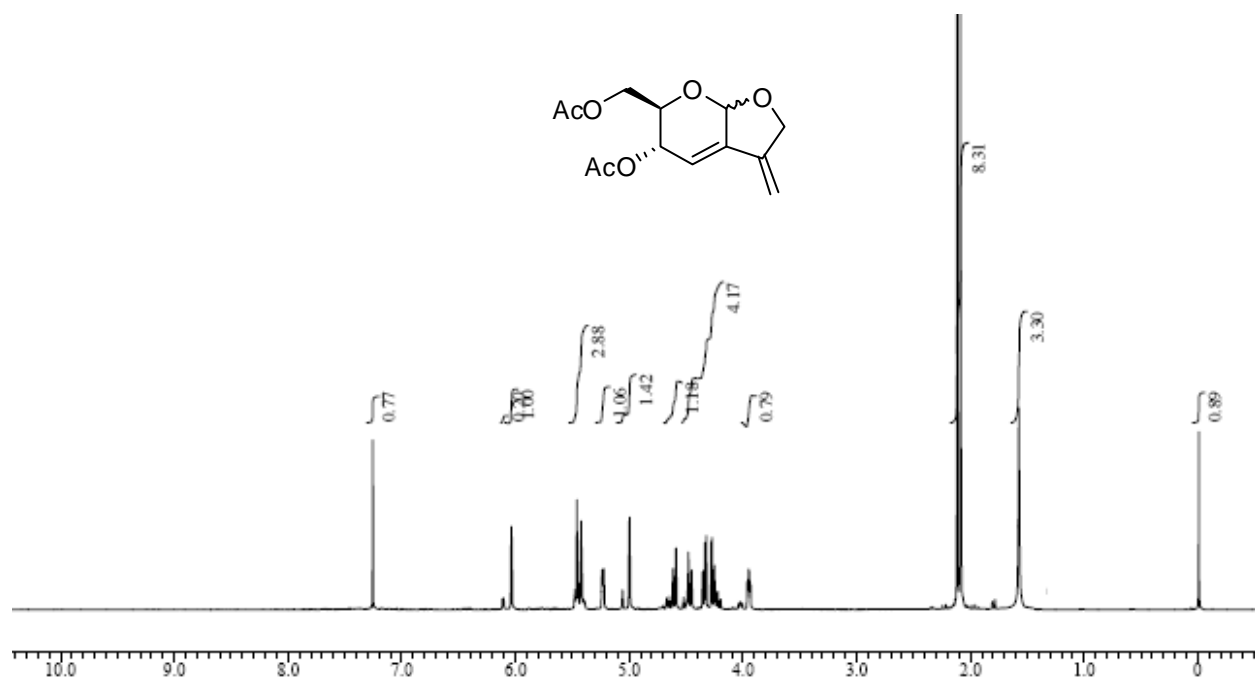

**Figure 34.1:** <sup>1</sup>H NMR (500 MHz, CDCl<sub>3</sub>) Spectrum of Compound 32

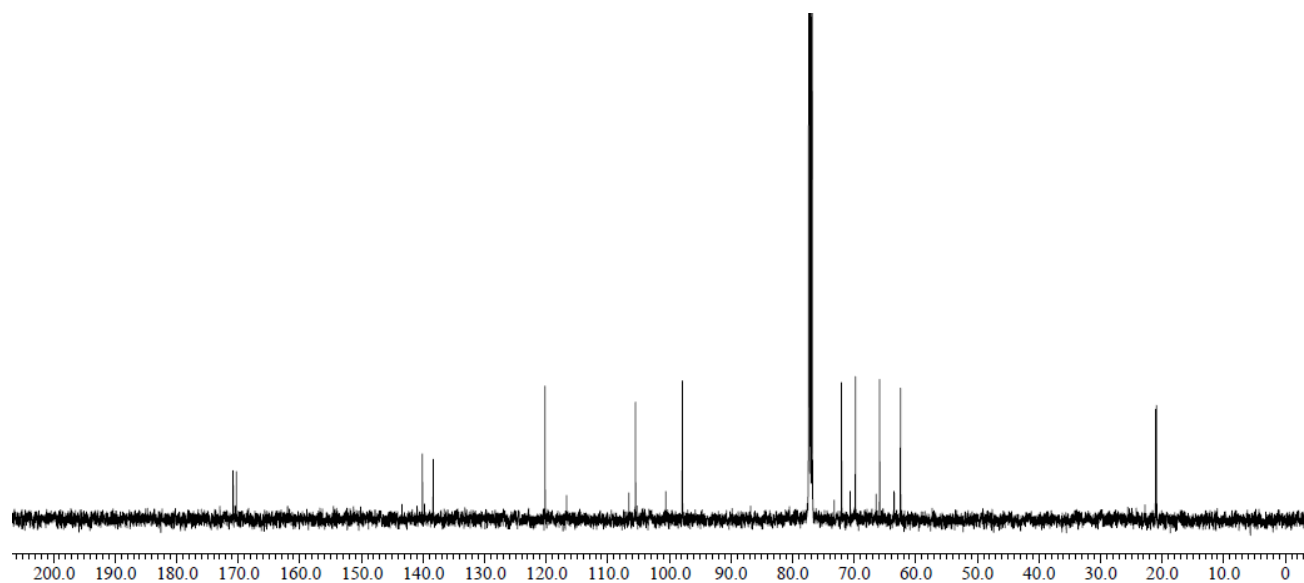

**Figure 34.2:** <sup>13</sup>C NMR (125 MHz, CDCl<sub>3</sub>) Spectrum of Compound 32

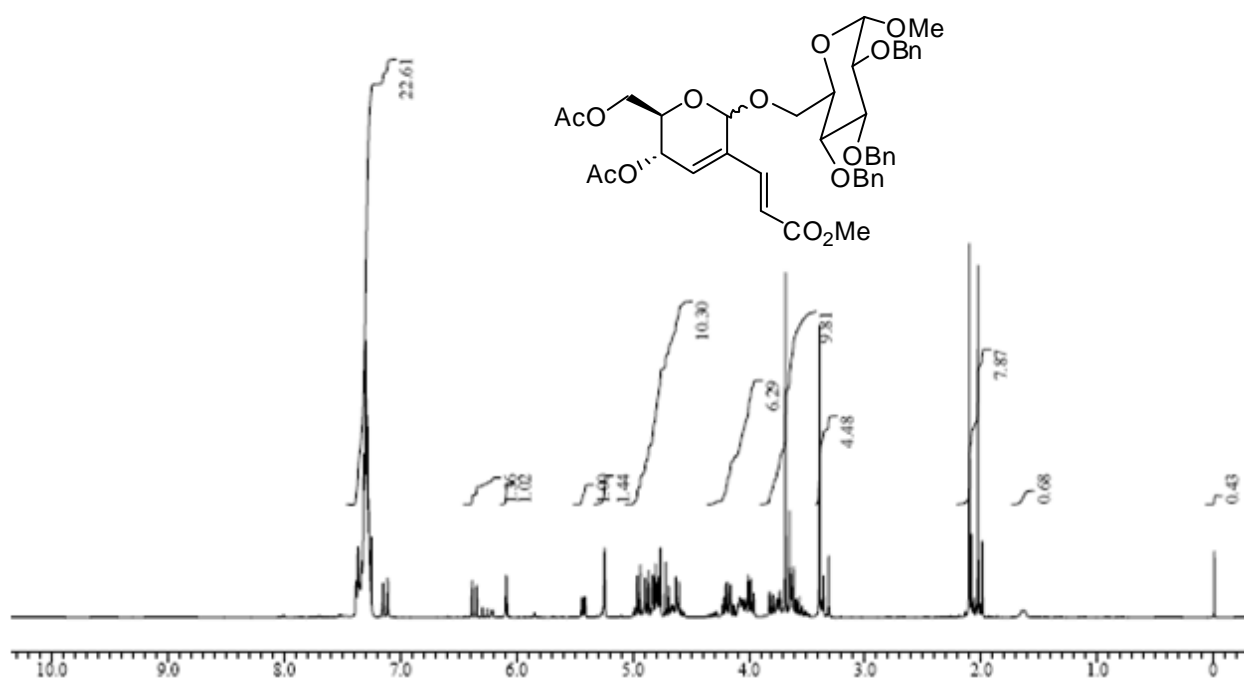

**Figure 35.1:**  $^1\text{H}$  NMR (400 MHz,  $\text{CDCl}_3$ ) Spectrum of Compound **33**

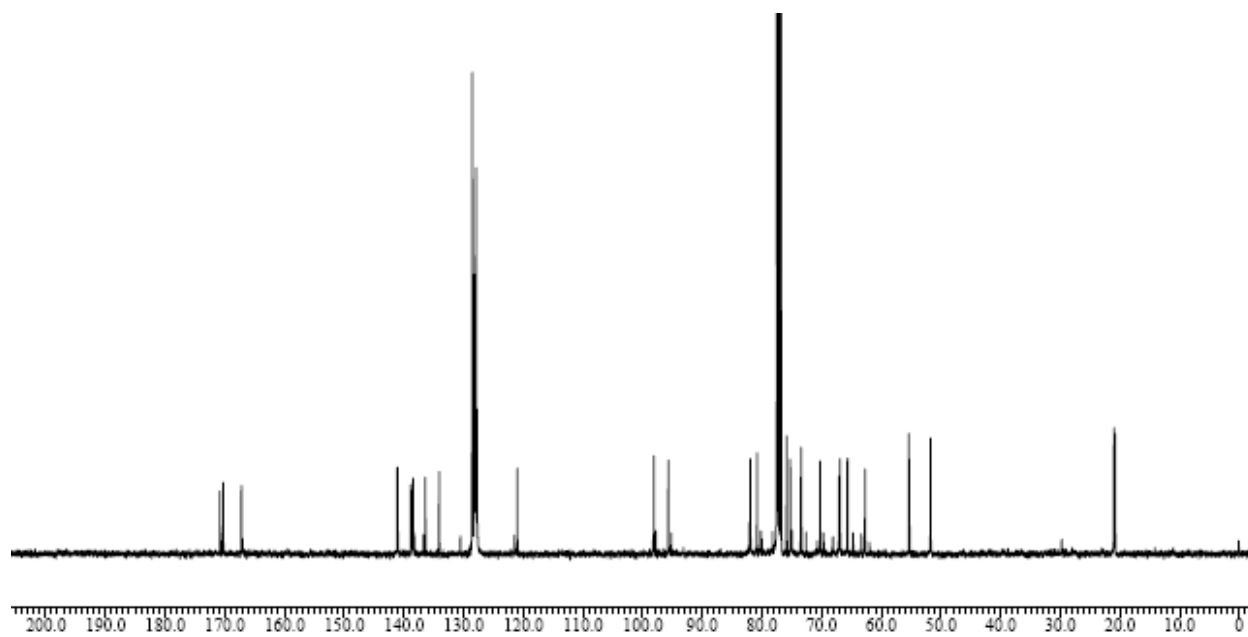

**Figure 35.2:**  $^{13}\text{C}$  NMR (100 MHz,  $\text{CDCl}_3$ ) Spectrum of Compound **33**

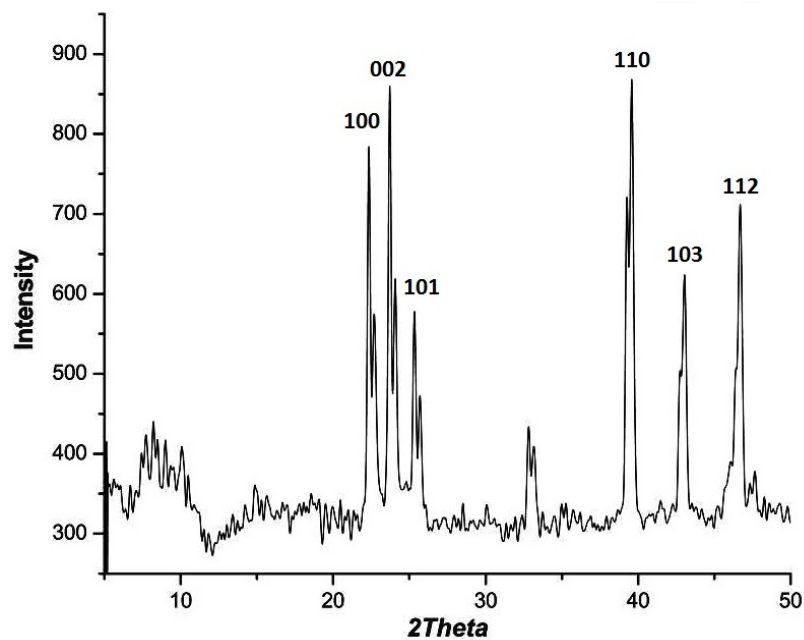

**Figure 36.1:** Powder XRD patterns of AgI

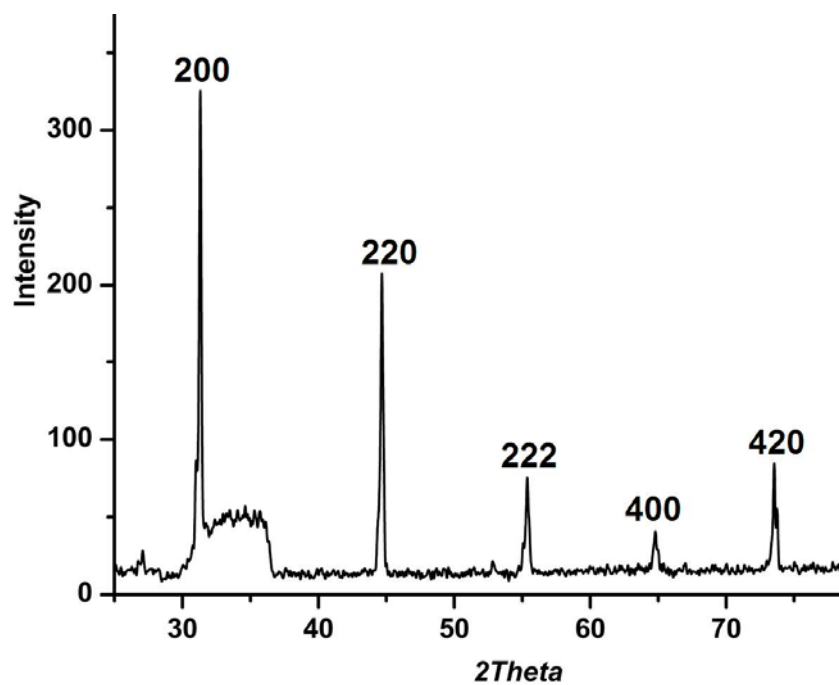

**Figure 36.2:** Powder XRD patterns of AgBr
